# Supplementary material
Source: publisher figshare collection journal article supplement (https://acs.figshare.com/ndownloader/files/3737350)
Supplement: Supplementary file 1 [file 3737350]

# Supporting Information

## Synthesis of Highly Substituted Racemic and Enantioenriched Allenylsilanes via Copper-Catalyzed Hydrosilylation of (Z)-2-Alken-4-ynoates with Silylboronate

Min Wang,<sup>†a</sup> Zheng-Li Liu,<sup>†a</sup> Xiang Zhang,<sup>a</sup> Pan-Pan Tian,<sup>a</sup>  
Yun-He Xu<sup>a\*</sup> and Teck-Peng Loh<sup>a,b\*</sup>

<sup>a</sup>*Hefei National Laboratory for Physical Sciences at the Microscale and Department of Chemistry, University of Science and Technology of China, Hefei, 230026, China*

<sup>b</sup>*Division of Chemistry and Biological Chemistry, School of Physical and Mathematical Sciences, Nanyang Technological University, Singapore 637371*

|                                                                                             |      |
|---------------------------------------------------------------------------------------------|------|
| General information.....                                                                    | S-2  |
| Synthesis of the enynoates.....                                                             | S-2  |
| Synthesis of the enynoates.....                                                             | S-6  |
| Synthesis of racemic allenylsilanes.....                                                    | S-9  |
| Synthesis of enantioenriched allenylsilanes.....                                            | S-30 |
| <sup>1</sup> H NMR, <sup>13</sup> C NMR and HPLC spectra of the enynoates and products..... | S-48 |
| Determination of the absolute configuration of compound 3s* .....                           | S-96 |

## General Information:

Experiments involving moisture and/or air sensitive components were performed in oven-dried glassware under a positive pressure of argon using dry solvents. Et<sub>3</sub>N was fractionally distilled. Other reagents were commercially purchased and were used as received without further purification for the reactions

Proton nuclear magnetic resonance (<sup>1</sup>H NMR) and carbon nuclear magnetic resonance (<sup>13</sup>C NMR) spectroscopy were performed on a Bruker Advance 400M NMR spectrometers. Chemical shifts <sup>1</sup>H NMR spectra are reported as in units of parts per million (ppm) downfield from SiMe<sub>4</sub> (0.0) and relative to the signal of chloroform-*d* (*J* = 7.264, singlet). Multiplicities were given as: s (singlet); d (doublet); t (triplet); q (quartet); dd (doublet of doublets); dt (doublet of triplets); m (multiplets) and etc. The number of protons (n) for a given resonance is indicated by nH. Coupling constants are reported as a *J* value in Hz. Carbon nuclear magnetic resonance spectra (<sup>13</sup>C NMR) are reported as d in units of parts per million (ppm) downfield from SiMe<sub>4</sub> (0.0) and relative to the signal of chloroform-*d* (*J* = 77.03, triplet).

High resolution mass spectral analysis (HRMS) was performed on Water XEVO G2 Q-TOF (Waters Corporation). The enantiomeric excesses were determined by HPLC analysis on Chiral Daicel Chiralpak OD-H, IC, columns.

## 1. Experimental Procedure:

### 1.1 Procedures for synthesis of the enynones.

All (Z)-2-alken-4-ynoates were prepared according to the reported literatures.<sup>1-3</sup>

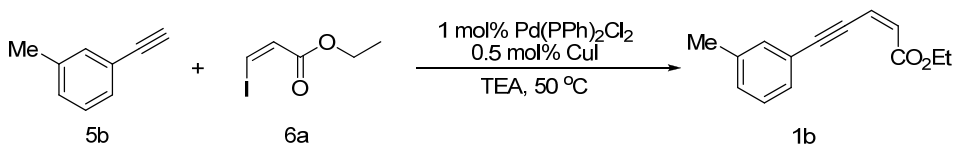

**1b** was synthesized according to the reported procedures.<sup>2</sup> To a mixture of (Z)-ethyl 3-iodoacrylate **6a** (1.13 g, 5 mmol, 1.0 equiv), PdCl<sub>2</sub>(PPh<sub>3</sub>)<sub>2</sub> (35.6 mg, 0.05 mmol, 1.0 mol%), CuI (4.9 mg, 0.025 mmol, 0.5 mol%) and TEA (20 mL) were added the corresponding alkyne **5b** (639 mg, 5.5 mmol, 1.1 equiv). The mixture was stirred at 50 °C until the starting material **6a** was completely consumed (monitored by TLC). Then the mixture was cooled to room temperature and diluted with diethyl ether (15 mL). Then the solution was washed with saturated ammonium chloride twice (10 mL×2). The aqueous layer was extracted with diethyl ether (10 mL). The combined organic layers were dried over anhydrous Na<sub>2</sub>SO<sub>4</sub> and evaporated in vacuo, the residue was purified by column chromatography (PE/EA = 97:3) to afford the product **1b** (921 mg, 86%) as colorless oil. <sup>1</sup>H NMR (400 MHz, CDCl<sub>3</sub>): δ 7.39 - 7.31 (m, 2H), 7.27 - 7.14 (m, 2H), 6.36 (d, *J* = 11.4 Hz, 1H), 6.12 (d, *J* = 11.4 Hz, 1H), 4.27 (q, *J* = 7.1 Hz, 2H), 2.34 (s, 3H), 1.34 (t, *J* = 7.1 Hz, 3H). <sup>13</sup>C NMR (100 MHz, CDCl<sub>3</sub>): δ 164.87, 138.08, 132.58, 130.11, 129.16, 128.26, 128.03, 122.95, 122.44, 101.52, 86.04, 60.43, 21.17, 14.31.

HRMS (ESI): *m/z* calculated for C<sub>14</sub>H<sub>14</sub>O<sub>2</sub>Na [M+Na]<sup>+</sup>: 237.0891, found: 237.0896.

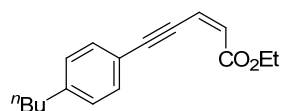

**1e**: To a mixture of (Z)-ethyl 3-iodoacrylate **6a** (1.13g, 5 mmol, 1.0 equiv), PdCl<sub>2</sub>(PPh<sub>3</sub>)<sub>2</sub> (35.6 mg, 0.05 mmol, 1.0 mol%), CuI (4.9 mg, 0.025 mmol, 0.5 mol%) and TEA (20 mL) were added the corresponding alkyne **5e** (871 mg, 5.5 mmol, 1.1 equiv). The mixture was stirred at 50 °C and dealt with according to the similar procedures as **1b** to give the product **1e** (1.06 g, 83%) as colorless oil. <sup>1</sup>H NMR (400 MHz, CDCl<sub>3</sub>): δ 7.50 - 7.42 (m, 2H), 7.20 - 7.10 (m, 2H), 6.36 (d, *J* = 11.4 Hz, 1H), 6.10 (d, *J* = 11.4 Hz, 1H), 4.26 (q, *J* = 7.1 Hz, 2H), 2.68 - 2.56 (m, 2H), 1.67 - 1.54 (m, 2H), 1.39 - 1.30 (m, 5H), 0.92 (t, *J* = 7.3 Hz, 3H). <sup>13</sup>C NMR (100 MHz, CDCl<sub>3</sub>): δ 164.93, 144.53, 132.02, 128.52, 127.70, 123.05, 119.78, 101.73, 85.99, 60.40, 35.67, 33.31, 22.30, 14.32, 13.91.

HRMS (ESI): *m/z* calculated for C<sub>17</sub>H<sub>20</sub>O<sub>2</sub>Na [M+Na]<sup>+</sup>: 279.1361, found: 279.1364.

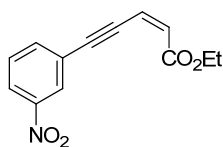

**1g**: To a mixture of (Z)-ethyl 3-iodoacrylate **6a** (1.13g, 5 mmol, 1.0 equiv), PdCl<sub>2</sub>(PPh<sub>3</sub>)<sub>2</sub> (35.6 mg, 0.05 mmol, 1.0 mol%), CuI (4.9 mg, 0.025 mmol, 0.5 mol%) and TEA (20 mL) were added the corresponding alkyne **5g** (810 mg, 5.5 mmol, 1.1 equiv). The mixture was stirred at 50 °C and dealt with according to the similar procedures as **1b** to give the product **1g** (932 mg, 76 %) as light yellow oil. <sup>1</sup>H NMR (400 MHz, CDCl<sub>3</sub>): δ 8.41 - 8.33 (m, 1H), 8.21 (ddd, *J* = 8.3, 2.2, 1.1 Hz, 1H), 7.85 - 7.82 (m, 1H), 7.59 - 7.51 (m, 1H), 6.37 (d, *J* = 11.5 Hz, 1H), 6.24 (d, *J* = 11.5 Hz, 1H), 4.28 (q, *J* = 7.1 Hz, 2H), 1.34 (t, *J* = 7.1 Hz, 3H). <sup>13</sup>C NMR (100 MHz, CDCl<sub>3</sub>): δ 164.47, 148.11, 137.59, 130.03, 129.45, 126.62, 124.46, 123.68, 121.78, 97.67, 88.24, 60.66, 14.26.

HRMS (ESI): *m/z* calculated for C<sub>13</sub>H<sub>11</sub>NO<sub>4</sub>Na [M+Na]<sup>+</sup>: 286.0586, found: 286.0582.

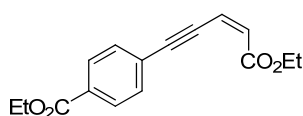

**1l**: To a mixture of (Z)-ethyl 3-iodoacrylate **6a** (1.13 g, 5 mmol, 1.0 equiv), PdCl<sub>2</sub>(PPh<sub>3</sub>)<sub>2</sub> (35.6 mg, 0.05 mmol, 1.0 mol%), CuI (4.9 mg, 0.025 mmol, 0.5 mol%) and TEA (20 mL) were added the corresponding alkyne **5l** (958 mg, 5.5 mmol, 1.1 equiv). The mixture was stirred at 50 °C and dealt with according to the similar procedures as **1b** to give the product **1l** (1.02 g, 75%) as colorless oil. <sup>1</sup>H NMR (400 MHz, CDCl<sub>3</sub>): δ 8.07 - 7.98 (m, 2H), 7.65 - 7.53 (m, 2H), 6.37 (d, *J* = 11.5 Hz, 1H), 6.19 (d, *J* = 11.5 Hz, 1H), 4.38 (q, *J* = 7.1 Hz, 2H), 4.27 (q, *J* = 7.1 Hz, 2H), 1.40 (t, *J* = 7.1 Hz, 3H), 1.33 (t, *J* = 7.1 Hz, 3H). <sup>13</sup>C NMR (100 MHz, CDCl<sub>3</sub>): δ 165.91, 164.64, 131.84, 130.62, 129.45, 129.25, 127.09, 122.28, 99.81, 88.63, 61.20, 60.56, 14.29, 14.27.

HRMS (ESI): *m/z* calculated for C<sub>16</sub>H<sub>16</sub>O<sub>4</sub>Na [M+Na]<sup>+</sup>: 295.0546, found: 295.0954.

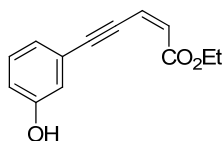

**1p:** To a mixture of (Z)-ethyl 3-iodoacrylate **6a** (1.13 g, 5 mmol, 1.0 equiv), PdCl<sub>2</sub>(PPh<sub>3</sub>)<sub>2</sub> (35.6 mg, 0.05 mmol, 1.0 mol%), CuI (4.9 mg, 0.025 mmol, 0.5 mol%) and TEA (20 mL) were added the corresponding alkyne **5p** (550 mg, 5.5 mmol, 1.1 equiv). The mixture was stirred at 50 °C and dealt with according to the similar procedures as **1b** to give the product **1p** (865 mg, 80%) as a brown solid. <sup>1</sup>H NMR (400 MHz, CDCl<sub>3</sub>): δ 7.19 - 7.12 (m, 1H), 7.08 - 7.03 (m, 1H), 7.00 (dd, *J* = 2.5, 1.4 Hz, 1H), 6.86 (ddd, *J* = 8.1, 2.6, 1.0 Hz, 1H), 6.37 (d, *J* = 11.4 Hz, 1H), 6.14 (d, *J* = 11.4 Hz, 1H), 5.58 (broad, 1H), 4.26 (q, *J* = 7.1 Hz, 2H), 1.33 (t, *J* = 7.1 Hz, 1H). <sup>13</sup>C NMR (100 MHz, CDCl<sub>3</sub>): δ 165.36, 155.95, 129.60, 127.97, 124.25, 123.51, 123.31, 118.72, 117.02, 101.45, 85.99, 60.77, 14.25.

HRMS (ESI): *m/z* calculated for C<sub>13</sub>H<sub>12</sub>O<sub>3</sub>Na [M+Na]<sup>+</sup>: 239.0684, found:239.0681.

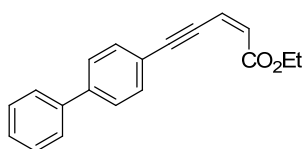

**1r:** To a mixture of (Z)-ethyl 3-iodoacrylate **6a** (1.13g, 5 mmol, 1.0 equiv), PdCl<sub>2</sub>(PPh<sub>3</sub>)<sub>2</sub> (35.6 mg, 0.05 mmol, 1.0 mol%), CuI (4.9 mg, 0.025 mmol, 0.5 mol%) and TEA (20 mL) were added the corresponding alkyne **5r** (980 mg, 5.5 mmol, 1.1 equiv). The mixture was stirred at 50 °C and dealt with according the similar procedures as **1b** to give the product **1r** (1.16 g, 84%) as a white solid. <sup>1</sup>H NMR (400 MHz, CDCl<sub>3</sub>): δ 7.66 - 7.54 (m, 6H), 7.51 - 7.41 (m, 2H), 7.41 - 7.32 (m, 1H), 6.39 (d, *J* = 11.4 Hz, 1H), 6.15 (d, *J* = 11.4 Hz, 1H), 4.28 (q, *J* = 7.1 Hz, 2H), 1.35 (t, *J* = 7.1 Hz, 3H). <sup>13</sup>C NMR (100 MHz, CDCl<sub>3</sub>): δ 164.88, 141.91, 140.17, 132.52, 128.87, 128.16, 127.80, 127.11, 127.05, 122.85, 121.52, 101.17, 87.10, 60.47, 14.34.

HRMS (ESI): *m/z* calculated for C<sub>19</sub>H<sub>16</sub>O<sub>2</sub>Na [M+Na]<sup>+</sup>: 299.1048, found:299.1054.

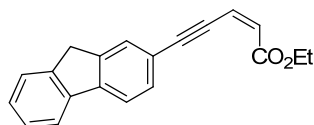

**1s:** To a mixture of (Z)-ethyl 3-iodoacrylate **6a** (1.13g, 5 mmol, 1.0 equiv), PdCl<sub>2</sub>(PPh<sub>3</sub>)<sub>2</sub> (35.6 mg, 0.05 mmol, 1.0 mol%), CuI (4.9 mg, 0.025 mmol, 0.5 mol%) and TEA (20 mL) were added the corresponding alkyne **5s** (1.05 g, 5.5 mmol, 1.1 equiv). The mixture was stirred at 50 °C and dealt with according to the similar procedures as **1b** to give product **1s** (1.04g 72%) as a white solid. <sup>1</sup>H NMR (400 MHz, CDCl<sub>3</sub>): δ 7.85 - 7.71 (m, 3H), 7.62 - 7.51 (m, 2H), 7.44 - 7.30 (m, 2H), 6.39 (d, *J* = 11.4 Hz, 1H), 6.13 (d, *J* = 11.4 Hz, 1H), 4.29 (q, *J* = 7.1 Hz, 2H), 3.90 (s, 2H), 1.35 (t, *J* = 7.1 Hz, 3H). <sup>13</sup>C NMR (100 MHz, CDCl<sub>3</sub>): δ 164.96, 143.73, 143.18, 142.87, 140.91, 131.11, 128.73, 127.73, 127.42, 126.96, 125.12, 123.10, 120.61, 120.35, 119.83, 102.34, 86.67, 60.43, 36.71, 14.35.

HRMS (ESI): *m/z* calculated for C<sub>20</sub>H<sub>16</sub>O<sub>2</sub>Na [M+Na]<sup>+</sup>: 311.1048, found:311.1054.

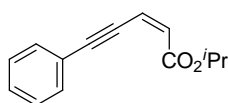

**1ad:** To a mixture of (Z)-iPr-3-iodoacrylate **6c** (1.2 g, 5 mmol, 1.0 equiv), PdCl<sub>2</sub>(PPh<sub>3</sub>)<sub>2</sub> (35.6 mg, 0.05 mmol, 1.0 mol%), CuI (4.9 mg, 0.025 mmol, 0.5 mol%) and TEA (20 mL) were added the corresponding alkyne **5a** (566 mg, 5.5 mmol, 1.1 equiv). The mixture was stirred at 50 °C and dealt with the similar procedures as **1b** to give the product **1ad** (804 mg, 75%) as colorless oil. <sup>1</sup>H NMR (400 MHz, CDCl<sub>3</sub>): δ 7.59 - 7.51 (m, 2H), 7.41 - 7.31 (m, 3H), 6.34 (d, *J* = 11.5 Hz, 1H), 6.11 (d, *J* = 11.5 Hz, 1H), 5.15 (m, 1H), 1.31 (d, *J* = 6.5 Hz, 6H). <sup>13</sup>C NMR (100 MHz, CDCl<sub>3</sub>): δ 164.39, 131.99, 129.11, 128.79, 128.37, 122.71, 122.44, 100.94, 86.37, 67.91, 21.97. HRMS (ESI): *m/z* calculated for C<sub>14</sub>H<sub>14</sub>O<sub>2</sub>Na [M+Na]<sup>+</sup>: 237.0891, found:237.0896.

## 1.2 The results of reactions between different silylboronates with 1a.

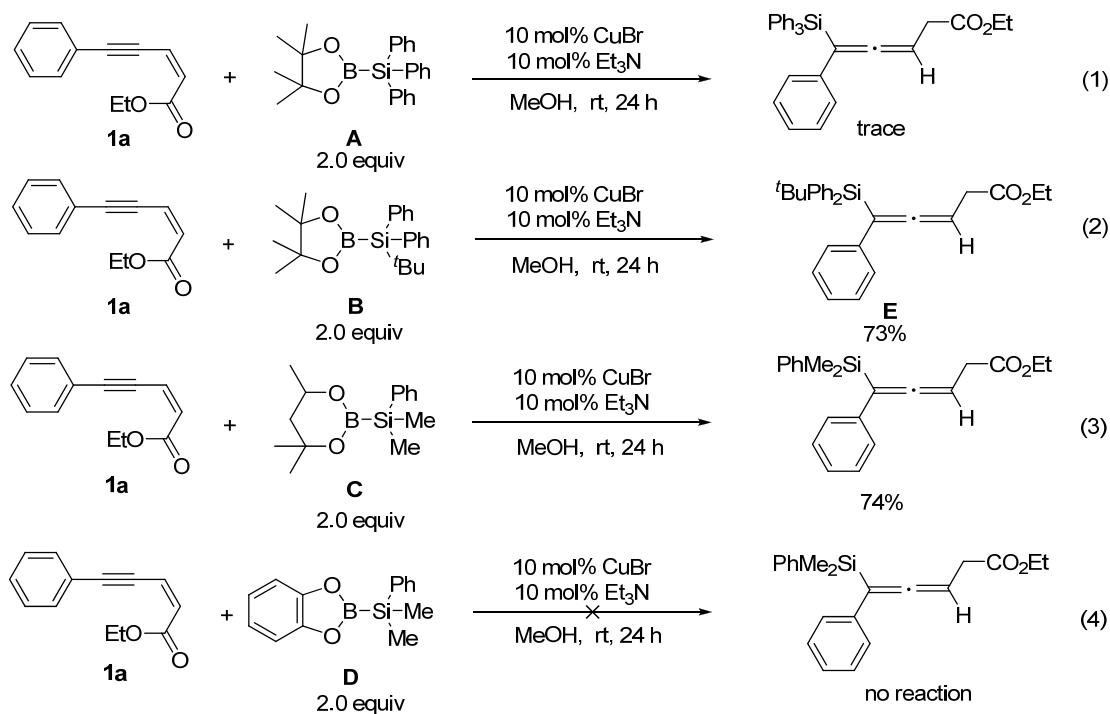

#### Procedures for the reaction between 1a and silylboronate B:

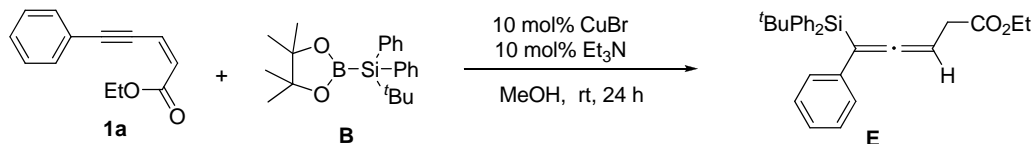

In an oven dried 15 mL Schlenk tube equipped with a stirring bar, 0.02 mmol (2.9 mg, 10 mol%) CuBr, 0.02 mmol (2.1 mg, 10 mol%) Et<sub>3</sub>N, were dissolved in 1 mL of dry MeOH under argon atmosphere. The solution was stirred for 5 min at room temperature. Then 0.2 mmol **1** (40.4 mg, 1.0 equiv) enynes, 0.4 mmol (2.0 equiv, 146.7 mg) <sup>t</sup>BuPh<sub>2</sub>Si-Bpin was added to the tube under Ar atmosphere. The final solution was continued to stir for 24 h at room temperature. Then the solution was diluted with DCM and filtered through Celite. The final filtrate was concentrated under vacuum to afford the crude product which was isolated through flash column chromatography (Eluent: PE/Et<sub>2</sub>O = 97:3) to furnish the related product **3** (64.1 mg, 73%) as colorless oil.

<sup>1</sup>H NMR (400 MHz, CDCl<sub>3</sub>): δ 7.72 (dd, *J* = 8.0, 1.6 Hz, 2H), 7.67 (dd, *J* = 8.0, 1.6 Hz, 2H), 7.43-7.25 (m, 6H), 7.15-7.09 (m, 2H), 7.09-7.00 (m, 3H), 5.39 (t, *J* = 7.4 Hz,

1H), 4.13 (q,  $J = 7.1$  Hz, 2H), 3.26- 3.01 (m, 2H), 1.23 (t,  $J = 7.1$  Hz, 3H), 1.06 (s, 9H).  $^{13}\text{C}$  NMR (100 MHz,  $\text{CDCl}_3$ ):  $\delta$  211.8, 171.2, 137.3, 136.3, 136.2, 134.1, 134.0, 129.3, 129.2, 128.7, 127.9, 127.6, 127.5, 126.2, 96.9, 81.4, 60.8, 34.2, 28.05, 19.3, 14.2.

HRMS (ESI):  $m/z$  calculated for  $\text{C}_{29}\text{H}_{23}\text{O}_2\text{Si}$   $[\text{M}+\text{H}]^+$ : 441.2250 found: 441.2248.

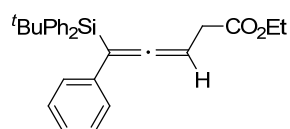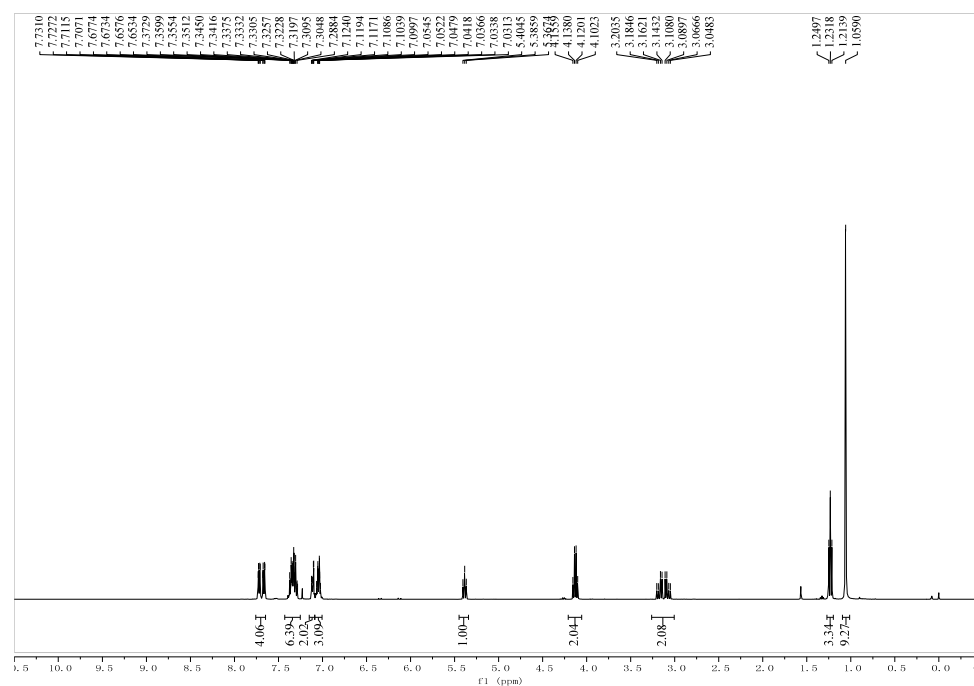



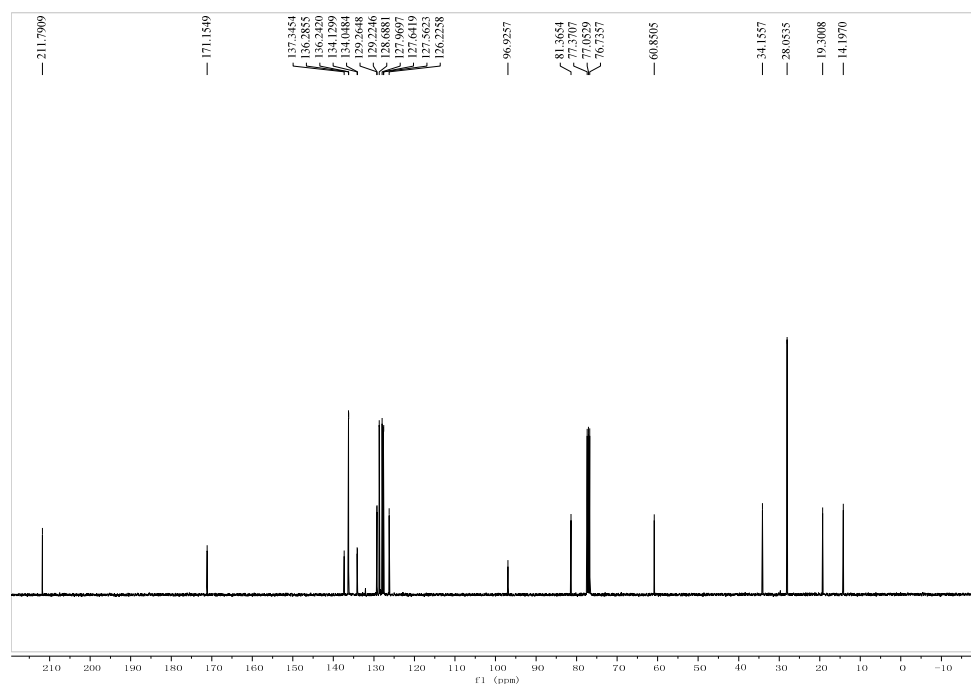

### Procedures for the reaction between **1a** and silylboronate **C**:

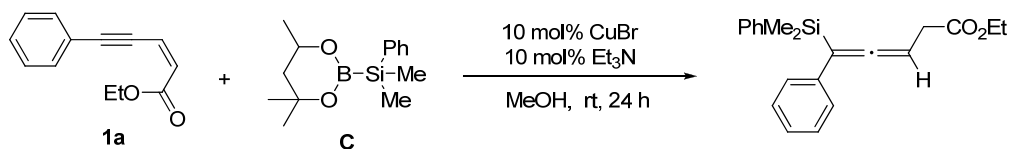

In an oven dried 15 mL Schlenk tube equipped with a stirring bar, 0.02 mmol (2.9 mg, 10 mol%) CuBr, 0.02 mmol (2.1 mg, 10 mol%) Et<sub>3</sub>N, were dissolved in 1 mL of dry MeOH under argon atmosphere. The solution was stirred for 5 min at room temperature. Then 0.2 mmol **1a** (40.4 mg, 1.0 equiv), 0.4 mmol **C** (105 mg, 2.0 equiv) was added to the tube under Ar atmosphere. The final solution was continued to stir for 24 h at room temperature. Then the solution was diluted with DCM and filtered through Celite. The final filtrate was concentrated under vacuum to afford the crude product which was isolated through flash column chromatography (Eluent: PE/Et<sub>2</sub>O = 97:3) to furnish the related product (50.1 mg, 74% yield) as colorless oil.

### 1.3 Procedures for synthesis of allenylsilanes:

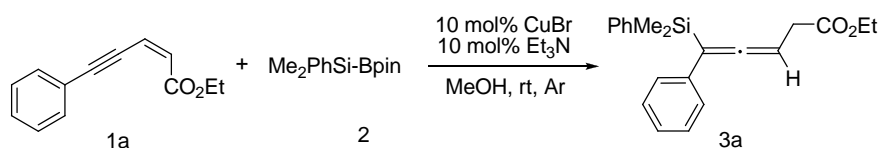

**3a:** In an oven dried 15 mL Schlenk tube equipped with a stirring bar, 0.02 mmol (2.9 mg, 10 mol%) CuBr and 0.02 mmol (2.1 mg, 10 mol%) Et<sub>3</sub>N were added into 1 mL of dry MeOH under argon atmosphere. The solution was stirred for 5min at room temperature. Then 0.2 mmol **1a** (40.4 mg, 1.0 equiv) and 0.4 mmol (2.0 equiv, 105 mg) Me<sub>2</sub>PhSi-Bpin were added to the tube in sequence under argon atmosphere. The final solution was continued to stir for 24 hours at room temperature. Then the solution was diluted with DCM and filtered through Celite. The final filtrate was concentrated under vacuum to afford the crude product which was purified through flash column chromatography (Eluent: PE/Et<sub>2</sub>O = 97:3 ) to furnish the related product **3a** (62.0 mg, 92%) as colorless oil. <sup>1</sup>H NMR (400 MHz, CDCl<sub>3</sub>): δ 7.61 - 7.55 (m, 2H), 7.36 - 7.32 (m, 3H), 7.24 - 7.17 (m, 4H), 7.16 - 7.10 (m, 1H), 5.37 (t, *J* = 7.4 Hz, 1H), 4.15 (q, *J* = 7.1 Hz, 2H), 3.15 (dd, *J* = 16.2, 7.2 Hz, 1H), 3.07 (dd, *J* = 16.2, 7.6 Hz, 1H), 1.25 (t, *J* = 7.1 Hz, 3H), 0.46 (s, 3H), 0.45 (s, 3H). <sup>13</sup>C NMR (100 MHz, CDCl<sub>3</sub>): δ 211.53, 173.26, 139.94, 138.32, 135.72, 131.03, 130.18, 129.78, 129.71, 128.24, 101.61, 82.96, 62.64, 36.08, 16.02, 0.00, -0.06.

HRMS (ESI): *m/z* calculated for C<sub>21</sub>H<sub>24</sub>O<sub>2</sub>SiNa [M+Na]<sup>+</sup>: 359.1443, found: 359.1443.

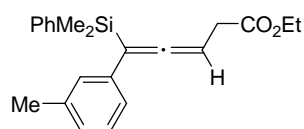

**3b:** In an oven dried 15 mL Schlenk tube equipped with a stirring bar, 0.02 mmol (2.9 mg, 10 mol%) CuBr, and 0.02 mmol (2.1 mg, 10 mol%) Et<sub>3</sub>N were added into 1 mL of dry MeOH under Ar atmosphere. The solution was stirred for 5 min at room temperature. Then 0.2 mmol **1c** (42.9 mg, 1.0 equiv), 0.4 mmol (105 mg, 2.0 equiv) SiMe<sub>2</sub>Ph-Bpin was added to the tube under argon atmosphere. The final solution was continued to stir for 24 hours at room temperature. Then the solution was diluted with DCM and filtered through Celite. The final filtrate was concentrated under vacuum to

afford the crude product which was isolated through flash column chromatography (Eluent: PE/Et<sub>2</sub>O = 97:3) to furnish the related product **3b** (64.1 mg) as colorless oil. <sup>1</sup>H NMR (400 MHz, CDCl<sub>3</sub>): δ 7.54 - 7.47 (m, 2H), 7.31 - 7.25 (m, 3H), 7.02 - 6.98 (m, 2H), 6.91 - 6.86 (m, 2H), 5.27 (t, *J* = 7.4 Hz, 1H), 4.07 (q, *J* = 7.2 Hz, 2H), 3.04 (dd, *J* = 16.2, 7.2 Hz, 1H), 2.99 (dd, *J* = 16.2, 7.6 Hz, 1H), 2.17 (s, 3H), 1.17 (t, *J* = 7.1 Hz, 3H), 0.38 (s, 3H), 0.38 (s, 3H). <sup>13</sup>C NMR (100 MHz, CDCl<sub>3</sub>): δ 211.47, 173.36, 140.10, 139.79, 138.26, 135.79, 131.07, 130.58, 130.10, 129.75, 129.13, 126.92, 101.66, 82.89, 62.68, 36.18, 23.30, 16.09, 0.09, 0.00. HRMS (ESI): *m/z* calculated for C<sub>22</sub>H<sub>26</sub>O<sub>2</sub>SiNa [M+Na]<sup>+</sup>: 373.1600 found: 373.1612.

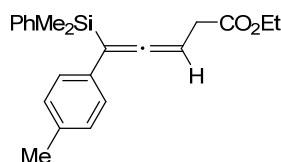

**3c:** In an oven dried 15 mL Schlenk tube equipped with a stirring bar, 0.02 mmol (2.9 mg, 10 mol%) CuBr and 0.02 mmol (2.1 mg, 10 mol%) Et<sub>3</sub>N were added into 1 mL of dry MeOH under argon atmosphere. The solution was stirred for 5 min at room temperature. Then 0.2 mmol **1c** (42.9 mg, 1.0 equiv) and 0.4 mmol (105 mg, 2.0 equiv) Me<sub>2</sub>PhSi-Bpin were added to the tube under argon atmosphere. The final solution was continued to stir for 24 hours at room temperature. Then the solution was diluted with DCM and filtered through Celite. The final filtrate was concentrated under vacuum to afford the crude product which was isolated through flash column chromatography (Eluent: PE/Et<sub>2</sub>O = 97:3) to furnish the related product **3c** (57.5 mg, 92%) as colorless oil. <sup>1</sup>H NMR (400 MHz, CDCl<sub>3</sub>): δ 7.40 - 7.38 (m, 2H), 7.17 - 7.13 (m, 3H), 6.92 (d, *J* = 8.1 Hz, 2H), 6.82 (d, *J* = 8.1 Hz, 2H), 5.15 (t, *J* = 7.4 Hz, 1H), 3.96 (q, *J* = 7.1 Hz, 2H), 2.92 (dd, *J* = 16.2, 7.2 Hz, 1H), 2.87 (dd, *J* = 16.2, 7.6 Hz, 1H), 2.08 (s, 3H), 1.06 (t, *J* = 7.1 Hz, 3H), 0.26 (s, 3H), 0.26 (s, 3H). <sup>13</sup>C NMR (100 MHz, CDCl<sub>3</sub>): δ 211.38, 173.37, 140.13, 138.00, 135.77, 135.23, 131.03, 130.97, 129.74, 129.70, 101.31, 82.96, 62.65, 22.96, 15.97, 0.08, 0.00. HRMS (ESI): *m/z* calculated for C<sub>22</sub>H<sub>26</sub>O<sub>2</sub>SiNa [M+Na]<sup>+</sup>: 373.1600 found: 373.1604.

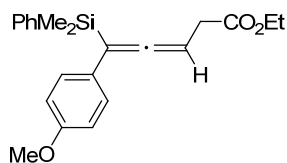

**3d:** In an oven dried 15 mL Schlenk tube equipped with a stirring bar, 0.02 mmol (2.9 mg, 10 mol%) CuBr and 0.02 mmol (2.1 mg, 10 mol%) Et<sub>3</sub>N were added into 1 mL of dry MeOH under argon atmosphere. The solution was stirred for 5 min at room temperature. Then 0.2 mmol **1d** (46.1 mg, 1.0 equiv) and 0.4 mmol (105 mg, 2.0 equiv) Me<sub>2</sub>PhSi-Bpin were added to the tube under argon atmosphere. The final solution was continued to stir for 24 hours at room temperature. Then the solution was diluted with DCM and filtered through Celite. The final filtrate was concentrated under vacuum to afford the crude product which was isolated through flash column chromatography (Eluent: PE/Et<sub>2</sub>O = 97:3) to furnish the related product **3d** (63.2 mg) as colorless oil. <sup>1</sup>H NMR (400 MHz, CDCl<sub>3</sub>) δ 7.51 - 7.49 (m, 2H), 7.28 - 7.25 (m, 3H), 7.09 - 7.06 (m, 2H), 6.69 - 6.66 (m, 2H), 5.27 (t, *J* = 7.3 Hz, 1H), 4.08 (q, *J* = 7.1 Hz, 2H), 3.66 (s, 3H), 3.04 (dd, *J* = 16.2, 7.2 Hz, 1H), 2.99 (dd, *J* = 16.2, 7.6 Hz, 1H), 1.17 (t, *J* = 7.1 Hz, 3H), 0.38 (s, 3H), 0.38 (s, 3H). <sup>13</sup>C NMR (100 MHz, CDCl<sub>3</sub>): δ 211.11, 173.39, 160.15, 140.10, 135.75, 131.04, 130.86, 130.34, 129.75, 115.72, 100.88, 83.04, 62.63, 57.06, 36.26, 16.13, 0.07, 0.00.

HRMS (ESI): *m/z* calculated for C<sub>22</sub>H<sub>26</sub>O<sub>3</sub>SiNa [M+Na]<sup>+</sup>: 385.1549, found: 385.1542.

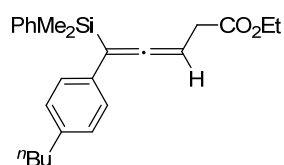

**3e:** In an oven dried 15 mL Schlenk tube equipped with a stirring bar, 0.02 mmol (2.9 mg, 10 mol%) CuBr and 0.02 mmol (2.1 mg, 10 mol%) Et<sub>3</sub>N were added into 1 mL of dry MeOH under argon atmosphere. The solution was stirred for 5 min at room temperature. Then 0.2 mmol **1e** (51.3 mg, 1.0 equiv) and 0.4 mmol (105 mg, 2.0 equiv) Me<sub>2</sub>PhSi-Bpin were added to the tube under argon atmosphere. The final solution was continued to stir for 24 hours at room temperature. Then the solution was diluted with DCM and filtered through Celite. The final filtrate was concentrated

under vacuum to afford the crude product which was isolated through flash column chromatography (Eluent: PE/Et<sub>2</sub>O = 97:3) to furnish the related product **3e** (63.1 mg) as colorless oil. <sup>1</sup>H NMR (400 MHz, CDCl<sub>3</sub>) δ 7.60 - 7.58 (m, 2H), 7.38 - 7.34 (m, 3H), 7.15 - 7.13 (m, 2H), 7.04 - 7.00 (m, 2H), 5.36 (t, *J* = 7.4 Hz, 1H), 4.17 (q, *J* = 6.9 Hz, 2H), 3.13 (dd, *J* = 16.2, 7.2 Hz, 1H), 3.07 (dd, *J* = 16.2, 7.6 Hz, 1H), 2.58 - 2.51 (m, 2H), 1.58 - 1.51 (m, 2H), 1.35 - 1.29 (m, 2H), 1.26 (t, *J* = 7.3 Hz, 3H) 0.90 (t, *J* = 7.3 Hz, 3H), 0.47 (s, 3H), 0.47(s, 3H). <sup>13</sup>C NMR (100 MHz, CDCl<sub>3</sub>): δ 211.33, 173.29, 142.97, 140.07, 135.68, 135.26, 130.92, 130.22, 129.64, 129.57, 101.23, 82.87, 62.56, 37.00, 36.12, 35.30, 24.11, 15.97, 15.71, 0.00. -0.07.

HRMS (ESI): *m/z* calculated for C<sub>25</sub>H<sub>32</sub>O<sub>2</sub>SiNa [M+Na]<sup>+</sup>: 415.2069, found: 415.2079.

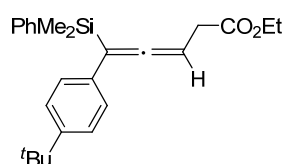

**3f:** In an oven dried 15 mL Schlenk tube equipped with a stirring bar, 0.02 mmol (2.9 mg, 10 mol%) CuBr and 0.02 mmol (2.1 mg, 10 mol%) Et<sub>3</sub>N were added into 1 mL of dry MeOH under argon atmosphere. The solution was stirred for 5 min at room temperature. Then 0.2 mmol **1f** (51.3 mg, 1.0 equiv) and 0.4 mmol (105 mg, 2.0 equiv) Me<sub>2</sub>PhSi-Bpin were added to the tube under argon atmosphere. The final solution was continued to stir for 24 hours at room temperature. Then the solution was diluted with DCM and filtered through Celite. The final filtrate was concentrated under vacuum to afford the crude product which was isolated through flash column chromatography (Eluent: PE/Et<sub>2</sub>O = 97:3) to furnish the related product **3f** (63.8 mg) as colorless oil. <sup>1</sup>H NMR (400 MHz, CDCl<sub>3</sub>): δ 7.63 - 7.56 (m, 2H), 7.40 - 7.31 (m, 3H), 7.26 - 7.20 (m, 2H), 7.20 - 7.12 (m, 2H), 5.35 (t, *J* = 7.4 Hz, 1H), 4.15 (q, *J* = 7.1 Hz, 2H), 3.11 (dd, *J* = 16.2, 7.2 Hz, 1H), 3.06 (dd, *J* = 16.2, 7.6 Hz, 1H), 1.27 - 1.23 (m, 12H), 0.46 (s, 3H), 0.46 (s, 3H). <sup>13</sup>C NMR (100 MHz, CDCl<sub>3</sub>): δ 211.52, 173.30, 151.19, 140.16, 135.73, 135.07, 130.97, 129.69, 129.40, 127.14, 101.14, 82.95, 62.60, 36.23, 36.17, 33.10, 16.02, 0.07, 0.00.

HRMS (ESI):  $m/z$  calculated for  $C_{25}H_{32}O_2SiNa$   $[M+Na]^+$ : 415.2069, found: 415.2074.

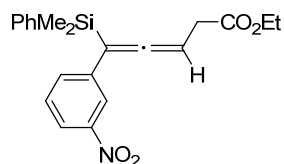

**3g:** In an oven dried 15 mL Schlenk tube equipped with a stirring bar, 0.02 mmol (2.9 mg, 10 mol%) CuBr and 0.02 mmol (2.1 mg, 10 mol%)  $Et_3N$  were added into 1 mL of dry MeOH under argon atmosphere. The solution was stirred for 5 min at room temperature. Then 0.2 mmol **1g** (49.1 mg, 1.0 equiv) and 0.4 mmol (2.0 equiv, 105 mg)  $Me_2PhSi$ -Bpin were added to the tube under argon atmosphere. The final solution was continued to stir for 24 hours at room temperature. Then the solution was diluted with DCM and filtered through Celite. The final filtrate was concentrated under vacuum to afford the crude product which was isolated through flash column chromatography (Eluent: PE/ $Et_2O$  = 97:3) to furnish the related product **3g** (43.1 mg) as colorless oil.  $^1H$  NMR (400 MHz,  $CDCl_3$ ):  $\delta$  8.00 (s, 1H), 7.89 (d,  $J$  = 8.1 Hz, 1H), 7.52 - 7.46 (m, 2H), 7.40 (d,  $J$  = 7.8 Hz, 1H), 7.32 - 7.22 (m, 4H), 5.40 (t,  $J$  = 7.4 Hz, 1H), 4.10 (q,  $J$  = 7.1 Hz, 2H), 3.08 (dd,  $J$  = 16.2, 7.2 Hz, 1H), 3.03 (dd,  $J$  = 16.2, 7.6 Hz, 1H), 1.18 (t,  $J$  = 7.1 Hz, 3H), 0.42 (s, 3H), 0.42 (s, 3H).  $^{13}C$  NMR (100 MHz,  $CDCl_3$ ):  $\delta$  212.43, 173.10, 150.48, 140.96, 139.05, 135.93, 135.86, 131.73, 131.21, 130.23, 124.73, 123.31, 101.11, 84.39, 63.10, 36.00, 16.29, 0.02, 0.01.

HRMS (ESI):  $m/z$  calculated for  $C_{21}H_{23}NO_4SiNa$   $[M+Na]^+$ : 404.1294, found: 404.1298.

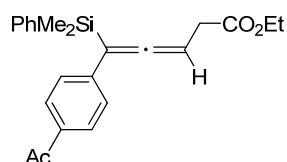

**3h:** In an oven dried 15 mL Schlenk tube equipped with a stirring bar, 0.02 mmol (2.9 mg, 10 mol%) CuBr and 0.02 mmol (2.1 mg, 10 mol%)  $Et_3N$  were added into 1 mL of dry MeOH under argon atmosphere. The solution was stirred for 5 min at room temperature. Then 0.2 mmol **1h** (48.5 mg, 1.0 equiv) and 0.4 mmol (2.0 equiv, 105

mg) Me<sub>2</sub>PhSi-Bpin were added to the tube under argon atmosphere. The final solution was continued to stir for 24 hours at room temperature. Then the solution was diluted with DCM and filtered through Celite. The final filtrate was concentrated under vacuum to afford the crude product which was isolated through flash column chromatography (Eluent: PE/Et<sub>2</sub>O = 97:3) to furnish the related product **3h** (48.1 mg) as colorless oil. <sup>1</sup>H NMR (400 MHz, CDCl<sub>3</sub>) δ 7.80-7.78 (m, 2H), 7.68 - 7.55 (m, 2H), 7.40 - 7.34(m, 3H), 7.30 - 7.28 (m, 2H), 5.43 (t, *J* = 7.4 Hz, 1H), 4.17 (q, *J* = 7.1 Hz, 2H), 3.14 (dd, *J* = 16.2, 7.2 Hz, 1H), 3.09 (dd, *J* = 16.2, 7.6 Hz, 1H), 2.53 (s, 3H), 1.25 (d, *J* = 7.1 Hz, 3H), 0.47 (s, 3H), 0.47 (s, 3H). <sup>13</sup>C NMR (100 MHz, CDCl<sub>3</sub>): δ 212.58, 199.57, 173.17, 144.06, 139.55, 137.11, 135.84, 135.50, 131.43, 130.50, 130.01, 101.73, 83.84, 62.97, 36.14, 28.13, 16.46, 0.08, 0.00. HRMS (ESI): *m/z* calculated for C<sub>23</sub>H<sub>26</sub> O<sub>3</sub>SiNa [M+Na]<sup>+</sup>: 401.1549, found: 401.1551.

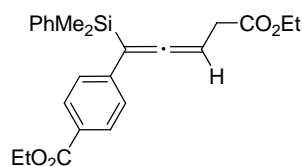

**3i:** In an oven dried 15 mL Schlenk tube equipped with a stirring bar, 0.02 mmol (2.9 mg, 10 mol%) CuBr and 0.02 mmol (2.1 mg, 10 mol%) Et<sub>3</sub>N were added into 1 mL of dry MeOH under argon atmosphere. The solution was stirred for 5 min at room tem. Then 0.2 mmol **1i** (54.5 mg, 1.0 equiv), 0.4 mmol (105 mg, 2.0 equiv) Me<sub>2</sub>PhSi-Bpin were added to the tube under argon atmosphere. The final solution was continued to stir for 24 hours at room temperature. Then the solution was diluted with DCM and filtered through Celite. The final filtrate was concentrated under vacuum to afford the crude product which was isolated through flash column chromatography (Eluent: PE/Et<sub>2</sub>O = 97:3) to furnish the related product **3i** (64.1 mg) as colorless oil. <sup>1</sup>H NMR (400 MHz, CDCl<sub>3</sub>): δ 7.89 - 7.84 (m, 2H), 7.59 - 7.53 (m, 2H), 7.40 - 7.34 (m, 3H), 7.29 - 7.23 (m, 2H), 5.42 (t, *J* = 7.4 Hz, 1H), 4.33 (q, *J* = 7.1 Hz, 2H), 4.16 (q, *J* = 7.1 Hz, 2H), 3.14 (dd, *J* = 16.2, 7.2 Hz, 1H), 3.08 (dd, *J* = 16.2, 7.6 Hz, 1H), 1.35 (t, *J* = 7.1 Hz, 3H), 1.26 (t, *J* = 7.1 Hz, 3H), 0.47 (s, 3H), 0.47 (s, 3H). <sup>13</sup>C NMR

(100 MHz, CDCl<sub>3</sub>):  $\delta$  212.35, 173.12, 168.38, 143.61, 139.52, 135.77, 131.55, 131.32, 130.29, 129.92, 129.73, 101.64, 83.51, 62.82, 62.71, 35.92, 16.24, 16.13, 0.00, -0.08.  
 HRMS (ESI):  $m/z$  calculated for C<sub>24</sub>H<sub>28</sub>O<sub>4</sub>SiNa [M+Na]<sup>+</sup>: 431.1655, found: 431.1655.

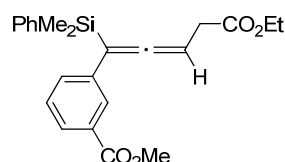

**3j**: In an oven dried 15 mL Schlenk tube equipped with a stirring bar, 0.02 mmol (2.9 mg, 10 mol%) CuBr and 0.02 mmol (2.1 mg, 10 mol%) Et<sub>3</sub>N were added into 1 mL of dry MeOH under argon atmosphere. The solution was stirred for 5 min at room temperature. Then 0.2 mmol **1j** (51.7 mg, 1.0 equiv), 0.4 mmol (105 mg, 2.0 equiv) Me<sub>2</sub>PhSi-Bpin were added to the tube under argon atmosphere. The final solution was continued to stir for 24 hours at room temperature. Then the solution was diluted with DCM and filtered through Celite. The final filtrate was concentrated under vacuum to afford the crude product which was isolated through flash column chromatography (Eluent: PE/Et<sub>2</sub>O = 97:3) to furnish the related product **3j** (72.8 mg) as colorless oil.  
<sup>1</sup>H NMR (400 MHz, CDCl<sub>3</sub>) :  $\delta$  7.82 - 7.81 (m, 1H), 7.73 - 7.71 (m, 1H), 7.53 - 7.47 (m, 2H), 7.28 (dd,  $J$  = 5.1, 1.9 Hz, 5H), 7.21 - 7.14 (m, 1H), 5.33 (t,  $J$  = 7.4 Hz, 1H), 4.08 (q,  $J$  = 7.1 Hz, 2H), 3.78 (s, 3H), 3.06 (dd,  $J$  = 16.2, 7.2 Hz, 1H), 3.00 (dd,  $J$  = 16.2, 7.2 Hz, 1H), 1.17 (t,  $J$  = 7.1 Hz, 3H), 0.40 (s, 3H), 0.40 (s, 3H). <sup>13</sup>C NMR (100 MHz, CDCl<sub>3</sub>):  $\delta$  211.79, 173.24, 168.96, 139.60, 139.12, 135.88, 134.29, 132.28, 131.32, 131.02, 130.36, 129.93, 129.52, 101.49, 83.51, 62.85, 54.02, 36.11, 16.18, -0.00, -0.12.

HRMS (ESI):  $m/z$  calculated for C<sub>23</sub>H<sub>26</sub>O<sub>4</sub>SiNa [M+Na]<sup>+</sup>: 417.1498, found: 417.1504.

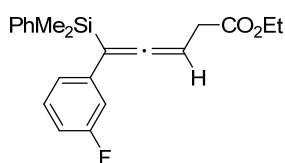



**3k:** In an oven dried 15 mL Schlenk tube equipped with a stirring bar, 0.02 mmol (2.9 mg, 10 mol%) CuBr and 0.02 mmol (2.1 mg, 10 mol%) Et<sub>3</sub>N were added into 1 mL of dry MeOH under argon atmosphere. The solution was stirred for 5 min at room temperature. Then 0.2 mmol **1k** (42.7 mg, 1.0 equiv), 0.4 mmol (105 mg, 2.0 equiv) Me<sub>2</sub>PhSi-Bpin were added to the tube under argon atmosphere. The final solution was continued to stir for 48 h at room temperature. Then the solution was diluted with DCM and filtered through Celite. The final filtrate was concentrated under vacuum to afford the crude product which was isolated through flash column chromatography (Eluent: PE/Et<sub>2</sub>O = 97:3) to furnish the related product **3k** (60.8 mg) as colorless oil. <sup>1</sup>H NMR (400 MHz, CDCl<sub>3</sub>): δ 7.59 - 7.56 (m, 2H), 7.38 - 7.35 (m, 3H), 7.18 - 7.12 (m, 1H), 6.97 - 6.93 (m, 2H), 6.86 - 6.81 (m, 1H), 5.41 (t, *J* = 7.4 Hz, 1H), 4.17 (q, *J* = 7.2 Hz, 2H), 3.14 (dd, *J* = 16.2, 7.2 Hz, 1H), 3.08 (dd, *J* = 16.2, 7.6 Hz, 1H) 1.27 (t, *J* = 7.1 Hz, 3H), 0.47 (s, 3H), 0.47 (s, 3H). <sup>13</sup>C NMR (100 MHz, CDCl<sub>3</sub>): δ 211.92, 173.21, 164.80 (d, *J* = 245.4 Hz), 141.02 (d, *J* = 7.5 Hz), 139.62, 135.83, 131.61 (d, *J* = 8.3 Hz), 131.35, 129.96, 125.60 (d, *J* = 2.8 Hz), 116.65 (d, *J* = 21.9 Hz), 115.29 (d, *J* = 21.3 Hz), 101.32, 83.56, 62.89, 36.07, 16.16, 0.06, 0.00. HRMS (ESI): *m/z* calculated for C<sub>21</sub>H<sub>23</sub> FO<sub>2</sub>SiNa [M+Na]<sup>+</sup>: 377.1349, found: 377.1341

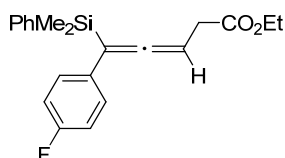

**3l:** In an oven dried 15 mL Schlenk tube equipped with a stirring bar, 0.02 mmol (2.9 mg, 10 mol%) CuBr and 0.02 mmol (2.1 mg, 10 mol%) Et<sub>3</sub>N were added into 1 mL of dry MeOH under argon atmosphere. The solution was stirred for 5 min at room temperature. Then 0.2 mmol **1l** (42.7 mg, 1.0 equiv), 0.4 mmol (105 mg, 2.0 equiv) Me<sub>2</sub>PhSi-Bpin were added to the tube under argon atmosphere. The final solution was continued to stir for 48 h at room temperature. Then the solution was diluted with DCM and filtered through Celite. The final filtrate was concentrated under vacuum to afford the crude product which was isolated through flash column chromatography (Eluent: PE/Et<sub>2</sub>O = 97:3) to furnish the related product **3l** (60.1 mg) as colorless oil.

$^1\text{H}$  NMR (400 MHz,  $\text{CDCl}_3$ )  $\delta$  7.57 - 7.55 (m, 2H), 7.37 - 7.34 (m, 3H), 7.17 - 7.14 (m, 2H), 6.92 - 6.86 (m, 2H), 5.37 (t,  $J = 7.4$  Hz, 1H), 4.16 (q,  $J = 7.1$  Hz, 2H), 3.12 (dd,  $J = 16.2, 7.2$  Hz, 1H), 3.07 (dd,  $J = 16.2, 7.2$  Hz, 1H), 1.25 (t,  $J = 7.1$  Hz, 3H), 0.45 (s, 3H), 0.45 (s, 3H).  $^{13}\text{C}$  NMR (100 MHz,  $\text{CDCl}_3$ )  $\delta$  211.57, 173.36, 163.58 (d,  $J = 245.6$  Hz), 139.82, 135.85, 134.36 (d,  $J = 3.3$  Hz), 131.41, 131.33, 129.96, 117.23 (d,  $J = 21.4$  Hz), 100.94, 83.32, 62.84, 36.21, 16.18, 0.06, 0.00.

HRMS (ESI):  $m/z$  calculated for  $\text{C}_{21}\text{H}_{23}\text{FO}_2\text{SiNa}$   $[\text{M}+\text{Na}]^+$ : 377.1349, found: 377.1355.

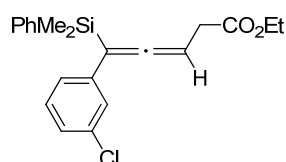

**3m:** In an oven dried 15 mL Schlenk tube equipped with a stirring bar, 0.02 mmol (2.9 mg, 10 mol%) CuBr and 0.02 mmol (2.1 mg, 10 mol%)  $\text{Et}_3\text{N}$  were added into 1 mL of dry MeOH under argon atmosphere. The solution was stirred for 5 min at room temperature. Then 0.2 mmol **1m** (47.0 mg, 1.0 equiv), 0.4 mmol (105 mg, 2.0 equiv)  $\text{Me}_2\text{PhSi-Bpin}$  were added to the tube under argon atmosphere. The final solution was continued to stir for 48 hours at room temperature. Then the solution was diluted with DCM and filtered through Celite. The final filtrate was concentrated under vacuum to afford the crude product which was isolated through flash column chromatography (Eluent: PE/ $\text{Et}_2\text{O} = 97:3$ ) to furnish the related product **3m** (60.4 mg) as colorless oil.

$^1\text{H}$  NMR (400 MHz,  $\text{CDCl}_3$ ):  $\delta$  7.59 - 7.57(m, 2H), 7.39 - 7.37 (m, 3H), 7.26 - 7.25 (m, 1H), 7.12 - 7.11(m, 2H), 7.06 - 7.02 (m, 1H), 5.41 (t,  $J = 7.4$  Hz, 1H), 4.22 - 4.15 (m, 2H), 3.14 (dd,  $J = 16.2, 7.2$  Hz, 1H), 3.09 (dd,  $J = 16.2, 7.6$  Hz, 1H), 1.27 (t,  $J = 7.1$  Hz, 3H), 0.48 (s, 3H), 0.48 (s, 3H).  $^{13}\text{C}$  NMR (100 MHz,  $\text{CDCl}_3$ ):  $\delta$  211.83, 173.15, 140.57, 139.51, 136.16, 135.78, 131.41, 131.33, 129.92, 129.87, 128.43, 127.94, 101.13, 83.56, 62.86, 36.03, 16.14, 0.00, -0.07.

HRMS (ESI):  $m/z$  calculated for  $\text{C}_{21}\text{H}_{23}\text{ClO}_2\text{SiNa}$   $[\text{M}+\text{Na}]^+$ : 393.1053, found: 393.1054.

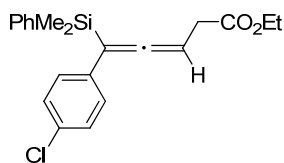

**3n:** In an oven dried 15 mL Schlenk tube equipped with a stirring bar, 0.02 mmol (2.9 mg, 10 mol%) CuBr and 0.02 mmol (2.1 mg, 10 mol%) Et<sub>3</sub>N were added into 1 mL of dry MeOH under argon atmosphere. The solution was stirred for 5 min at room temperature. Then 0.2 mmol **1n** (47.0 mg, 1.0 equiv) and 0.4 mmol (2.0 equiv, 105 mg) Me<sub>2</sub>PhSi-Bpin were added to the tube under argon atmosphere. The final solution was continued to stir for 24 hours at room temperature. Then the solution was diluted with DCM and filtered through Celite. The final filtrate was concentrated under vacuum to afford the crude product which was isolated through flash column chromatography (Eluent: PE/Et<sub>2</sub>O = 97:3) to furnish the related product **3n** (68.6 mg) as colorless oil.

<sup>1</sup>H NMR (400 MHz, CDCl<sub>3</sub>): δ 7.49 - 7.47 (m 2H), 7.30 - 7.27 (m, 3H), 7.09 - 7.04 (m, 4H), 5.31 (t, *J* = 7.4 Hz, 1H), 4.08 (q, *J* = 7.1 Hz, 2H), 3.05 (dd, *J* = 16.2, 7.2 Hz, 1H), 3.00 (dd, *J* = 16.2, 7.6 Hz, 1H), 1.18 (t, *J* = 7.1 Hz, 3H), 0.38 (s, 3H), 0.38 (s, 3H). <sup>13</sup>C NMR (100 MHz, CDCl<sub>3</sub>): δ 211.70, 173.21, 139.63, 136.99, 135.78, 134.12, 131.30, 131.10, 130.43, 129.92, 100.96, 83.44, 62.87, 36.04, 16.06, 0.00, -0.08.

HRMS (ESI): *m/z* calculated for C<sub>21</sub>H<sub>23</sub> ClO<sub>2</sub>SiNa [M+Na]<sup>+</sup>: 393.1053, found: 393.1048.

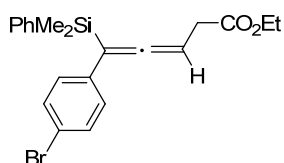

**3o:** In an oven dried 15 mL Schlenk tube equipped with a stirring bar, 0.02 mmol (2.9 mg, 10 mol%) CuBr and 0.02 mmol (2.1 mg, 10 mol%) Et<sub>3</sub>N were added into 1 mL of dry MeOH under argon atmosphere. The solution was stirred for 5 min at room temperature. Then 0.2 mmol **1o** (55.9 mg, 1.0 equiv) and 0.4 mmol (105 mg, 2.0 equiv) Me<sub>2</sub>PhSi-Bpin were added to the tube under argon atmosphere. The final solution was continued to stir for 48 hours at room temperature. Then the solution was diluted with DCM and filtered through Celite. The final filtrate was concentrated

under vacuum to afford the crude product which was isolated through flash column chromatography (Eluent: PE/Et<sub>2</sub>O = 97:3) to furnish the related product **3o** (70.1 mg) as colorless oil. <sup>1</sup>H NMR (400 MHz, CDCl<sub>3</sub>): δ 7.57 - 7.53 (m, 2H), 7.39 - 7.34 (m, 3H), 7.33 - 7.31 (m, 1H), 7.30 - 7.29 (m, 1H), 7.09 - 7.04 (m, 2H), 5.37 (t, *J* = 7.4 Hz, 1H), 4.16 (q, *J* = 7.1 Hz, 2H), 3.12 (dd, *J* = 16.2, 7.2 Hz, 1H), 3.07 (dd, *J* = 16.2, 7.6 Hz, 1H), 1.25 (t, *J* = 7.1 Hz, 3H), 0.45 (s, 3H), 0.45 (s, 3H). <sup>13</sup>C NMR (100 MHz, CDCl<sub>3</sub>): δ 211.75, 173.27, 139.68, 137.58, 135.85, 133.45, 131.54, 131.39, 130.00, 122.32, 101.11, 83.56, 62.89, 36.09, 16.22, 0.08, 0.00.

HRMS (ESI): *m/z* calculated for C<sub>21</sub>H<sub>23</sub> BrO<sub>2</sub>SiNa [M+Na]<sup>+</sup>: 437.0548, found: 437.0550.

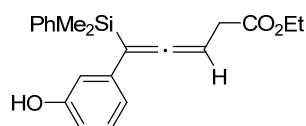

**3p**: In an oven dried 15 mL Schlenk tube equipped with a stirring bar, 0.02 mmol (2.9 mg, 10 mol%) CuBr and 0.02 mmol (2.1 mg, 10 mol%) Et<sub>3</sub>N were added into 1 mL of dry MeOH under argon atmosphere. The solution was stirred for 5 min at room temperature. Then 0.2 mmol **1p** (43.3 mg, 1.0 equiv) and 0.4 mmol (105 mg, 2.0 equiv) Me<sub>2</sub>PhSi-Bpin were added to the tube under argon atmosphere. The final solution was continued to stir for 48 hours at room temperature. Then the solution was diluted with DCM and filtered through Celite. The final filtrate was concentrated under vacuum to afford the crude product which was isolated through flash column chromatography (Eluent: PE/Et<sub>2</sub>O = 97:3) to furnish the related product **3p** (59.9 mg) as colorless oil. <sup>1</sup>H NMR (400 MHz, CDCl<sub>3</sub>) δ 7.61 - 7.57 (m, 2H), 7.39 - 7.33 (m, 3H), 7.08 - 7.04 (m, 1H), 6.80 - 6.73 (m, 2H), 6.67 - 6.64 (m, 1H), 5.77 (s, 1H), 5.35 (t, *J* = 7.4 Hz, 1H), 4.16 (q, *J* = 7.1 Hz, 2H), 3.12 (dd, *J* = 16.2, 7.2 Hz, 1H), 3.07 (dd, *J* = 16.2, 7.6 Hz, 1H), 1.26 (t, *J* = 7.1 Hz, 4H), 0.47 (s, 3H), 0.47 (s, 3H). <sup>13</sup>C NMR (100 MHz, CDCl<sub>3</sub>): δ 211.64, 173.80, 157.62, 139.88, 135.73, 131.31, 131.07, 129.74, 129.59, 122.23, 116.55, 115.55, 101.53, 82.93, 62.91, 36.07, 15.98, 0.00.

HRMS (ESI): *m/z* calculated for C<sub>21</sub>H<sub>24</sub>O<sub>3</sub>SiNa [M+Na]<sup>+</sup>: 375.1392, found: 375.1401.

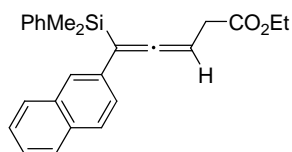

**3q:** In an oven dried 15 mL Schlenk tube equipped with a stirring bar, 0.02 mmol (2.9 mg, 10 mol%) CuBr and 0.02 mmol (2.1 mg, 10 mol%) Et<sub>3</sub>N were added into 1 mL of dry MeOH under argon atmosphere. The solution was stirred for 5 min at room temperature. Then 0.2 mmol **1q** (50.1 mg, 1.0 equiv), 0.4 mmol (105 mg, 2.0 equiv) Me<sub>2</sub>PhSi-Bpin were added to the tube under argon atmosphere. The final solution was continued to stir for 24 hours at room temperature. Then the solution was diluted with DCM and filtered through Celite. The final filtrate was concentrated under vacuum to afford the crude product which was isolated through flash column chromatography (Eluent: PE/Et<sub>2</sub>O = 97:3) to furnish the related product **3q** (72.9 mg) as colorless oil. <sup>1</sup>H NMR (400 MHz, CDCl<sub>3</sub>): δ 7.68 - 7.64 (m, 1H), 7.61 (d, *J* = 8.2 Hz, 1H), 7.57 - 7.52 (m, 3H), 7.48 (d, *J* = 1.2 Hz, 1H), 7.37 (dd, *J* = 8.5, 1.8 Hz, 1H), 7.32 - 7.26 (m, 5H), 5.36 (t, *J* = 7.4 Hz, 1H), 4.09 (q, *J* = 7.1 Hz, 2H), 3.09 (dd, *J* = 16.2, 7.2 Hz, 1H), 3.03 (dd, *J* = 16.2, 7.6 Hz, 1H), 1.19 (d, *J* = 7.1 Hz, 3H), 0.44 (s, 3H), 0.44 (s, 3H). <sup>13</sup>C NMR (100 MHz, CDCl<sub>3</sub>): δ 212.00, 173.23, 139.93, 135.76, 135.72, 135.26, 133.98, 131.10, 129.76, 129.72, 129.63, 129.31, 128.36, 128.29, 127.74, 127.36, 101.84, 83.29, 62.65, 36.10, 16.03, 0.09, 0.00. HRMS (ESI): *m/z* calculated for C<sub>25</sub>H<sub>26</sub>O<sub>2</sub>SiNa [M+Na]<sup>+</sup>: 409.1600, found: 409.1602.

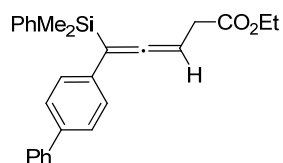

**3r:** In an oven dried 15 mL Schlenk tube equipped with a stirring bar, 0.02 mmol (2.9 mg, 10 mol%) CuBr and 0.02 mmol (2.1 mg, 10 mol%) Et<sub>3</sub>N, were added into 1 mL of dry MeOH under argon atmosphere. The solution was stirred for 5 min at room temperature. Then 0.2 mmol **1r** (55.3 mg, 1.0 equiv) and 0.4 mmol (2.0 equiv, 105 mg) Me<sub>2</sub>PhSi-Bpin were added to the tube under argon atmosphere. The final solution was continued to stir for 48 hours at room temperature. Then the solution

was diluted with DCM and filtered through Celite. The final filtrate was concentrated under vacuum to afford the crude product which was isolated through flash column chromatography (Eluent: PE/Et<sub>2</sub>O = 97:3) to furnish the related product **3r** (69.5 mg) as colorless oil. <sup>1</sup>H NMR (400 MHz, CDCl<sub>3</sub>) δ 7.61 - 7.59 (m, 2H), 7.55 - 7.51 (m, 2H), 7.45 - 7.43 (m, 2H), 7.41 - 7.34 (m, 5H), 7.31 - 7.28 (m, 3H), 5.40 (t, *J* = 7.4 Hz, 1H), 4.16 (q, *J* = 7.1 Hz, 2H), 3.14 (dd, *J* = 16.2, 7.2 Hz, 1H), 3.09 (dd, *J* = 16.2, 7.6 Hz, 1H), 1.26 (t, *J* = 7.1 Hz, 3H), 0.49 (s, 3H), 0.49 (s, 3H). <sup>13</sup>C NMR (100 MHz, CDCl<sub>3</sub>): δ 211.73, 173.23, 142.58, 141.06, 139.92, 137.32, 135.75, 131.10, 130.54, 130.18, 129.77, 128.96, 128.91, 128.70, 101.29, 83.19, 62.67, 36.09, 16.05, 0.08, 0.00.

HRMS (ESI): *m/z* calculated for C<sub>27</sub>H<sub>28</sub> O<sub>2</sub>SiNa [M+Na]<sup>+</sup>: 435.1756, found: 435.1765.

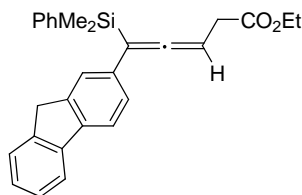

**3s:** In an oven dried 15 mL Schlenk tube equipped with a stirring bar, 0.02 mmol (2.9 mg, 10 mol%) CuBr and 0.02 mmol (2.1 mg, 10 mol%) Et<sub>3</sub>N were added into 1 mL of dry MeOH under argon atmosphere. The solution was stirred for 5 min at room temperature. Then 0.2 mmol **1s** (58.0 mg, 1.0 equiv), 0.4 mmol (105 mg, 2.0 equiv) Me<sub>2</sub>PhSi-Bpin were added to the tube under argon atmosphere. The final solution was continued to stir for 48 hours at room temperature. Then the solution was diluted with DCM and filtered through Celite. The final filtrate was concentrated under vacuum to afford the crude product which was isolated through flash column chromatography (Eluent: PE/Et<sub>2</sub>O = 97:3) to furnish the related product **3s** (64.7 mg) as colorless oil. <sup>1</sup>H NMR (400 MHz, CDCl<sub>3</sub>) δ 7.68 (d, *J* = 7.5 Hz, 1H), 7.61 - 7.58 (m, 3H), 7.47 (d, *J* = 7.1 Hz, 1H), 7.42 (s, 1H), 7.36 - 7.31 (m, 4H), 7.26 - 7.19 (m, 2H), 5.40 (t, *J* = 7.4 Hz, 1H), 4.16 (q, *J* = 7.1 Hz, 2H), 3.79 (s, 2H), 3.20 - 3.06 (m, 2H), 1.25 (t, *J* = 7.1 Hz, 3H), 0.49 (s, 6H), 0.49 (s, 3H). <sup>13</sup>C NMR (100 MHz, CDCl<sub>3</sub>): δ 211.38, 173.14, 145.17, 144.96, 143.13, 141.86, 139.88, 136.67, 135.61, 130.90, 129.59, 128.38,

128.37, 128.17, 126.61, 126.24, 121.39, 121.35, 101.81, 82.90, 62.49, 38.53, 36.02, 15.91, 0.00, -0.08.

HRMS (ESI):  $m/z$  calculated for  $C_{28}H_{28}O_2SiNa$   $[M+Na]^+$ : 447.1756, found: 447.1773.

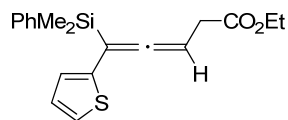

**3t:** In an oven dried 15 mL Schlenk tube equipped with a stirring bar, 0.02 mmol (2.9 mg, 10 mol%) CuBr and 0.02 mmol (2.1 mg, 10 mol%) Et<sub>3</sub>N were added into 1 mL of dry MeOH under argon atmosphere. The solution was stirred for 5 min at room temperature. Then 0.2 mmol **1t** (41.3 mg, 1.0 equiv), 0.4 mmol (105 mg, 2.0 equiv) Me<sub>2</sub>PhSi-Bpin was added to the tube under argon atmosphere. The final solution was continued to stir for 72 hours at room temperature. Then the solution was diluted with DCM and filtered through Celite. The final filtrate was concentrated under vacuum to afford the crude product which was isolated through flash column chromatography (Eluent: PE/Et<sub>2</sub>O = 97:3) to furnish the related product **3t** (42 mg) as colorless oil. <sup>1</sup>H NMR (400 MHz, CDCl<sub>3</sub>): δ 7.63 - 7.60 (m, 2H), 7.41 - 7.34 (m, 3H), 7.11 - 7.10 (m, 1H), 6.83 (dd,  $J$  = 5.2, 3.6 Hz, 1H), 6.69 - 6.68 (m, 1H), 5.43 (t,  $J$  = 7.4 Hz, 1H), 4.18 (q,  $J$  = 7.1 Hz, 2H), 3.14 (dd,  $J$  = 16.2, 7.2 Hz, 1H), 3.08 (dd,  $J$  = 16.2, 7.6 Hz, 1H), 1.27 (t,  $J$  = 7.1 Hz, 3H), 0.52 (s, 6H). <sup>13</sup>C NMR (100 MHz, CDCl<sub>3</sub>): δ 211.13, 173.28, 142.19, 139.47, 136.07, 131.50, 130.01, 129.35, 127.24, 126.52, 96.80, 84.22, 62.95, 36.33, 16.32, 0.09, 0.00.

HRMS (ESI):  $m/z$  calculated for  $C_{19}H_{22}O_2SiNa$   $[M+Na]^+$ : 387.1756, found: 387.1747.

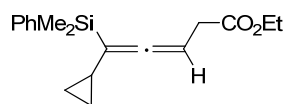

**3u:** In an oven dried 15 mL Schlenk tube equipped with a stirring bar, 0.02 mmol (2.9 mg, 10 mol%) CuBr and 0.02 mmol (2.1 mg, 10 mol%) Et<sub>3</sub>N were added into 1 mL of dry MeOH under argon atmosphere. The solution was stirred for 5 min at room temperature. Then 0.2 mmol **1u** (32.8 mg, 1.0 equiv), 0.4 mmol (105 mg, 2.0 equiv) Me<sub>2</sub>PhSi-Bpin were added to the tube under argon atmosphere. The final solution was

continued to stir for 24 hours at room temperature. Then the solution was diluted with DCM and filtered through Celite. The final filtrate was concentrated under vacuum to afford the crude product which was isolated through flash column chromatography (Eluent: PE/Et<sub>2</sub>O = 97:3) to furnish the related product **3u** (52.8 mg) as colorless oil. <sup>1</sup>H NMR (400 MHz, CDCl<sub>3</sub>) : δ 7.59 - 7.56 (m, 2H), 7.37 - 7.34 (m, 3H), 5.06 (td, *J* = 7.3, 1.8 Hz, 1H), 4.14 (q, *J* = 7.1 Hz, 2H), 2.95 (dd, *J* = 16.2, 7.2 Hz, 1H), 2.90 (dd, *J* = 16.2, 7.6 Hz, 1H), 1.26 (t, *J* = 7.1 Hz, 4H), 1.07 - 1.00 (m, 1H), 0.64 - 0.60 (m, 2H), 0.46 - 0.34 (m, 8H). <sup>13</sup>C NMR (100 MHz, CDCl<sub>3</sub>): δ 204.78, 171.75, 138.00, 133.89, 129.08, 127.71, 101.14, 81.45, 60.63, 34.79, 14.21, 9.56, 8.22, 7.82, -2.83, -2.89. HRMS (ESI): *m/z* calculated for C<sub>18</sub>H<sub>24</sub>O<sub>2</sub>SiNa [M+Na]<sup>+</sup>: 323.1443, found: 323.1442.

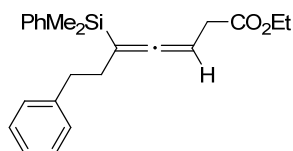

**3v**: In an oven dried 15 mL Schlenk tube equipped with a stirring bar, 0.02 mmol (2.9 mg, 10 mol%) CuBr and 0.02 mmol (2.1 mg, 10 mol%) Et<sub>3</sub>N were added into 1 mL of dry MeOH under argon atmosphere. The solution was stirred for 5 min at room temperature. Then 0.2 mmol **1v** (45.6 mg, 1.0 equiv), 0.4 mmol (105 mg, 2.0 equiv) Me<sub>2</sub>PhSi-Bpin were added to the tube under argon atmosphere. The final solution was continued to stir for 24 h at room temperature. Then the solution was diluted with DCM and filtered through Celite. The final filtrate was concentrated under vacuum to afford the crude product which was isolated through flash column chromatography (Eluent: PE/Et<sub>2</sub>O = 97:3) to furnish the related product **3v** (64.4 mg) as colorless oil. <sup>1</sup>H NMR (400 MHz, CDCl<sub>3</sub>): δ 7.53 - 7.48 (m, 2H), 7.36 - 7.33 (m, 3H), 7.24 - 7.20 (m, 2H), 7.17 - 7.13 (m, 1H), 7.10 - 7.05 (m, 2H), 5.06 - 5.01 (m, 1H), 4.14 (q, *J* = 7.1 Hz, 2H), 2.93 (dd, *J* = 16.2, 7.2 Hz, 1H), 2.91 (dd, *J* = 16.2, 7.6 Hz, 1H), 2.70 - 2.67 (m, 2H), 2.24 - 2.19 (m, 2H), 1.25 (t, *J* = 7.1 Hz, 4H), 0.36 (s, 3H), 0.36 (s, 3H). <sup>13</sup>C NMR (100 MHz, CDCl<sub>3</sub>): δ 206.86, 171.86, 142.12, 137.75, 133.84, 129.18, 128.47, 128.20, 127.82, 125.73, 96.31, 80.26, 60.64, 35.14, 34.61, 30.89, 14.26, -3.08, -3.16.



HRMS (ESI):  $m/z$  calculated for  $C_{24}H_{28}O_2SiNa$   $[M+Na]^+$ : 387.1756, found: 387.1747.

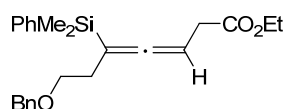

**3w**: In an oven dried 15 mL Schlenk tube equipped with a stirring bar, 0.02 mmol (2.9 mg, 10 mol%) CuBr and 0.02 mmol (2.1 mg, 10 mol%) Et<sub>3</sub>N were dissolved in 1 mL of dry MeOH under argon atmosphere. The solution was stirred for 5 min at room temperature. Then 0.2 mmol **1w** (51.7 mg, 1.0 equiv) and 0.4 mmol (105 mg, 2.0 equiv) Me<sub>2</sub>PhSi-Bpin were added to the tube under argon atmosphere. The final solution was continued to stir for 24 hours at room temperature. Then the solution was diluted with DCM and filtered through Celite. The final filtrate was concentrated under vacuum to afford the crude product which was isolated through flash column chromatography (Eluent: PE/Et<sub>2</sub>O = 97:3) to furnish the related product **3w** (72.8 mg) as colorless oil. <sup>1</sup>H NMR (400 MHz, CDCl<sub>3</sub>)  $\delta$  7.52 - 7.47 (m, 2H), 7.35 - 7.23 (m, 8H), 5.08 - 4.97 (m, 1H), 4.42 (s, 2H), 4.12 (q,  $J$  = 7.1 Hz, 2H), 3.51 (t,  $J$  = 7.2 Hz, 2H), 2.95 (d,  $J$  = 7.4 Hz, 2H), 2.25 (td,  $J$  = 7.3, 2.9 Hz, 2H), 1.24 (t,  $J$  = 7.1 Hz, 3H), 0.36 (s, 6H). <sup>13</sup>C NMR (100 MHz, CDCl<sub>3</sub>):  $\delta$  206.89, 171.77, 138.50, 137.62, 133.83, 129.19, 128.32, 127.81, 127.64, 127.48, 93.23, 79.71, 72.86, 69.75, 60.65, 34.56, 29.31, 14.24, -3.13, -3.02.

HRMS (ESI):  $m/z$  calculated for  $C_{24}H_{30}O_3SiNa$   $[M+Na]^+$ : 417.1862, found: 417.1858.

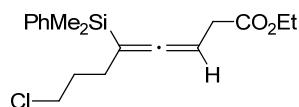

**3x**: In an oven dried 15 mL Schlenk tube equipped with a stirring bar, 0.02 mmol (2.9 mg, 10 mol%) CuBr and 0.02 mmol (2.1 mg, 10 mol%) Et<sub>3</sub>N and were added into 1 mL of dry MeOH under argon atmosphere. The solution was stirred for 5 min at room temperature. Then 0.2 mmol **1x** (40.2 mg, 1.0 equiv), 0.4 mmol (105 mg, 2.0 equiv) Me<sub>2</sub>PhSi-Bpin were added to the tube under argon atmosphere. The final solution was

continued to stir for 24 h at room temperature. Then the solution was diluted with DCM and filtered through Celite. The final filtrate was concentrated under vacuum to afford the crude product which was isolated through flash column chromatography (Eluent: PE/Et<sub>2</sub>O = 97:3) to furnish the related product **3x** (55.7 mg) as colorless oil. <sup>1</sup>H NMR (400 MHz, CDCl<sub>3</sub>) δ 7.52 - 7.50 (m, 2H), 7.36 - 7.35(m, 3H), 5.08 - 5.02 (m, 1H), 4.14 (q, *J* = 7.1 Hz, 2H), 3.49 (t, *J* = 6.5 Hz, 2H), 2.97 (dd, *J* = 7.4, 2.1 Hz, 2H), 2.08 - 2.04 (m, 2H), 1.91 - 1.84 (m, 2H), 1.26 (t, *J* = 7.1 Hz, 3H), 0.38 (s, 6H). <sup>13</sup>C NMR (100 MHz, CDCl<sub>3</sub>): δ 206.49, 171.69, 137.51, 133.75, 129.23, 127.83, 95.66, 80.36, 60.70, 44.51, 34.59, 31.58, 26.20, 14.22, -3.15, -3.21. HRMS (ESI): *m/z* calculated for C<sub>18</sub>H<sub>25</sub>ClO<sub>2</sub>SiNa [M+Na]<sup>+</sup>: 359.1210, found: 359.1203.

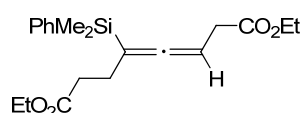

**3y:** In an oven dried 15 mL Schlenk tube equipped with a stirring bar, 0.02 mmol (2.9 mg, 10 mol%) CuBr and 0.02 mmol (2.1 mg, 10 mol%) Et<sub>3</sub>N were added into 1 mL of dry MeOH under argon atmosphere. The solution was stirred for 5 min at room temperature. Then 0.2 mmol **1y** (44.9 mg, 1.0 equiv), 0.4 mmol (105 mg, 2.0 equiv) Me<sub>2</sub>PhSi-Bpin were added to the tube under argon atmosphere. The final solution was continued to stir for 24 hours at room temperature. Then the solution was diluted with DCM and filtered through Celite. The final filtrate was concentrated under vacuum to afford the crude product which was isolated through flash column chromatography (Eluent: PE/Et<sub>2</sub>O = 97:3) to furnish the related product **3y** (66.2 mg) as colorless oil. <sup>1</sup>H NMR (400 MHz, CDCl<sub>3</sub>) δ 7.55 - 7.49 (m, 2H), 7.40 - 7.29 (m, 3H), 5.12 - 5.01 (m, 1H), 4.21 - 4.04 (m, 4H), 2.95 (dd, *J* = 7.3, 2.7 Hz, 2H), 2.44 - 2.40 (m, 2H), 2.26 - 2.17 (m, 2H), 1.28 - 1.20 (m, 6H), 0.38 (s, 6H). <sup>13</sup>C NMR (100 MHz, CDCl<sub>3</sub>): δ 206.19, 173.21, 171.65, 137.44, 133.80, 129.23, 127.83, 96.03, 81.13, 60.67, 60.23, 34.58, 33.28, 24.02, 14.20, 14.13, -3.19, -3.25. HRMS (ESI): *m/z* calculated for C<sub>20</sub>H<sub>28</sub>O<sub>4</sub>SiNa [M+Na]<sup>+</sup>: 383.1655, found: 383.1651.

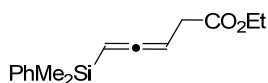

**3z:** In an oven dried 15 mL Schlenk tube equipped with a stirring bar, 0.02 mmol (2.9 mg, 10 mol%) CuBr and 0.02 mmol (2.1 mg, 10 mol%) Et<sub>3</sub>N were added into 1 mL of dry MeOH under argon atmosphere. The solution was stirred for 5 min at room temperature. Then 0.2 mmol **1z** (24.9 mg, 1.0 equiv), 0.4 mmol (105 mg, 2.0 equiv) Me<sub>2</sub>PhSi-Bpin were added to the tube under argon atmosphere. The final solution was continued to stir for 24 hours at room temperature. Then the solution was diluted with DCM and filtered through Celite. The final filtrate was concentrated under vacuum to afford the crude product which was isolated through flash column chromatography (Eluent: PE/Et<sub>2</sub>O = 97:3) to furnish the related product **3z** (43.0 mg) as colorless oil. <sup>1</sup>H NMR (400 MHz, Chloroform-*d*) δ 7.58 - 7.49 (m, 2H), 7.37 - 7.34 (m, 3H), 5.17 - 5.14 (m, 1H), 4.99 (q, *J* = 7.3 Hz, 1H), 4.14 (q, *J* = 7.1 Hz, 2H), 3.00 - 2.97 (m, 2H), 1.25 (t, *J* = 7.1 Hz, 3H), 0.37 (s, 6H). <sup>13</sup>C NMR (100 MHz, CDCl<sub>3</sub>) δ 213.47, 174.09, 140.60, 136.04, 131.60, 130.22, 84.69, 79.91, 63.13, 36.33, 16.64, 0.02, 0.00. HRMS (ESI): *m/z* calculated for C<sub>15</sub>H<sub>20</sub>O<sub>2</sub>SiNa [M+Na]<sup>+</sup>: 283.1130, found: 283.1129.

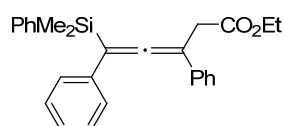

**3aa:** In an oven dried 15 mL Schlenk tube equipped with a stirring bar, 0.02 mmol (2.9 mg, 10 mol%) CuBr and 0.02 mmol (2.1 mg, 10 mol%) Et<sub>3</sub>N were added into 1 mL of dry MeOH under argon atmosphere. The solution was stirred for 5 min at room temperature. Then 0.2 mmol **1aa** (55.3 mg, 1.0 equiv), 0.4 mmol (105 mg, 2.0 equiv) Me<sub>2</sub>PhSi-Bpin were added to the tube under argon atmosphere. The final solution was continued to stir for 24 hours at room temperature. Then the solution was diluted with DCM and filtered through Celite. The final filtrate was concentrated under vacuum to afford the crude product which was isolated through flash column chromatography (Eluent: PE/Et<sub>2</sub>O = 97:3) to furnish the related product **3aa** (71.7 mg) as colorless oil. <sup>1</sup>H NMR (400 MHz, CDCl<sub>3</sub>) δ 7.66 - 7.60 (m, 2H), 7.43 - 7.28 (m, 9H), 7.24 - 7.12

(m, 4H), 4.11 (qd,  $J = 7.1, 1.7$  Hz, 2H), 3.61 - 3.45 (m, 2H), 1.16 (t,  $J = 7.1$  Hz, 3H), 0.52 (s, 3H), 0.51 (s, 3H).  $^{13}\text{C}$  NMR (100 MHz,  $\text{CDCl}_3$ ):  $\delta$  212.71, 172.87, 139.63, 137.53, 137.14, 135.62, 130.97, 130.28, 130.14, 129.86, 129.63, 128.41, 128.26, 126.92, 104.82, 99.12, 62.62, 38.51, 15.76, 0.00, -0.07.  
 HRMS (ESI):  $m/z$  calculated for  $\text{C}_{27}\text{H}_{28}\text{O}_2\text{SiNa}$   $[\text{M}+\text{Na}]^+$ : 435.1756, found: 435.1762.

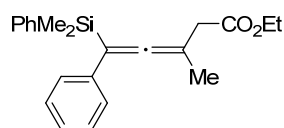

**3ab:** In an oven dried 15 mL Schlenk tube equipped with a stirring bar, 0.02 mmol (2.9 mg, 10 mol%) CuBr and 0.02 mmol (2.1 mg, 10 mol%)  $\text{Et}_3\text{N}$  were added into 1 mL of dry MeOH under argon atmosphere. The solution was stirred for 5 min at room temperature. Then 0.2 mmol **1ab** (42.9 mg, 1.0 equiv), 0.4 mmol (105 mg, 2.0 equiv)  $\text{Me}_2\text{PhSi}$ -Bpin were added to the tube under argon atmosphere. The final solution was continued to stir for 24 hours at room temperature. Then the solution was diluted with DCM and filtered through Celite. The final filtrate was concentrated under vacuum to afford the crude product which was isolated through flash column chromatography (Eluent:  $\text{PE}/\text{Et}_2\text{O} = 97:3$ ) to furnish the related product **3ab** (49.5 mg) as colorless oil.  
 $^1\text{H}$  NMR (400 MHz,  $\text{CDCl}_3$ ):  $\delta$  7.60 - 7.57 (m, 2H), 7.36 - 7.34 (m, 3H), 7.24 - 7.17 (m, 4H), 7.13 - 7.09 (m, 1H), 4.13 (qd,  $J = 7.1, 0.9$  Hz, 2H), 3.04 (s, 2H), 1.85 (s, 3H), 1.22 (t,  $J = 7.1$  Hz, 3H), 0.453 (s, 3H), 0.448 (s, 3H).  $^{13}\text{C}$  NMR (100 MHz,  $\text{CDCl}_3$ ):  $\delta$  210.98, 173.04, 140.47, 139.23, 135.77, 130.99, 130.19, 129.91, 129.75, 128.09, 100.69, 92.45, 62.61, 41.70, 20.12, 16.09, 0.22, 0.00.

HRMS (ESI):  $m/z$  calculated for  $\text{C}_{22}\text{H}_{26}\text{O}_2\text{SiNa}$   $[\text{M}+\text{Na}]^+$ : 373.1600, found: 373.1605.

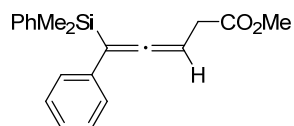

**3ac:** In an oven dried 15 mL Schlenk tube equipped with a stirring bar, 0.02 mmol (2.9 mg, 10 mol%) CuBr and 0.02 mmol (2.1 mg, 10 mol%)  $\text{Et}_3\text{N}$  were added into 1 mL of dry MeOH under argon atmosphere. The solution was stirred for 5 min at room

temperature. Then 0.2 mmol **1ac** (37.2 mg, 1.0 equiv), 0.4 mmol (105 mg, 2.0 equiv) Me<sub>2</sub>PhSi-Bpin were added to the tube under argon atmosphere. The final solution was continued to stir for 24 hours at room temperature. Then the solution was diluted with DCM and filtered through Celite. The final filtrate was concentrated under vacuum to afford the crude product which was isolated through flash column chromatography (Eluent: PE/Et<sub>2</sub>O = 97:3) to furnish the related product **3ac** (61.8 mg) as colorless oil. <sup>1</sup>H NMR (400 MHz, CDCl<sub>3</sub>): δ 7.60 - 7.57 (m, 2H), 7.38 - 7.35 (m, 3H), 7.22 - 7.21 (m, 4H), 7.17 - 7.12 (m, 1H), 5.37 (t, *J* = 7.4 Hz, 1H), 3.70 (s, 3H), 3.14 (dd, *J* = 16.2, 7.2 Hz, 1H), 3.09 (dd, *J* = 16.2, 7.6 Hz, 1H), 0.473 (s, 3H), 0.468 (s, 3H). <sup>13</sup>C NMR (100 MHz, CDCl<sub>3</sub>): δ 211.56, 173.77, 139.99, 138.37, 135.81, 131.13, 130.29, 129.86, 129.80, 128.35, 101.83, 82.88, 53.81, 35.85, 0.06, 0.00. HRMS (ESI): *m/z* calculated for C<sub>20</sub>H<sub>22</sub>O<sub>2</sub>SiNa [M+Na]<sup>+</sup>: 345.1287, found:345.1289.

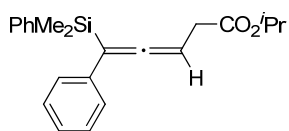

**3ad:** In an oven dried 15 mL Schlenk tube equipped with a stirring bar, 0.02 mmol (2.9 mg, 10 mol%) CuBr and 0.02 mmol (2.1 mg, 10 mol%) Et<sub>3</sub>N were added in 1 mL of dry MeOH under argon atmosphere. The solution was stirred for 5 min at room temperature. Then 0.2 mmol **1ad** (42.9 mg, 1.0 equiv), 0.4 mmol (105 mg, 2.0 equiv) Me<sub>2</sub>PhSi-Bpin were added to the tube under argon atmosphere. The final solution was continued to stir for 48 hours at room temperature. Then the solution was diluted with DCM and filtered through Celite. The final filtrate was concentrated under vacuum to afford the crude product which was isolated through flash column chromatography (Eluent: PE/Et<sub>2</sub>O = 97:3) to furnish the related product **3ad** (55.5 mg) as colorless oil. <sup>1</sup>H NMR (400 MHz, CDCl<sub>3</sub>): δ 7.60 - 7.57(m, 2H), 7.36 - 7.34 (m, 3H), 7.24 - 7.18 (m, 4H), 7.14 - 7.10 (m, 1H), 5.37 (t, *J* = 7.4 Hz, 1H), 5.03 (m, 1H), 3.16 - 3.00 (m, 2H), 1.24 - 1.22 (m, 7H), 0.47 (s, 3H), 0.46 (s, 3H). <sup>13</sup>C NMR (100 MHz, CDCl<sub>3</sub>): δ 211.54, 172.73, 139.94, 138.33, 135.69, 131.00, 130.14, 129.76, 129.69, 128.19, 101.47, 83.07, 70.02, 36.41, 23.62, 0.00, -0.05. HRMS (ESI): *m/z* calculated for C<sub>22</sub>H<sub>26</sub>O<sub>2</sub>SiNa [M+Na]<sup>+</sup>: 373.1600, found:373.1607.

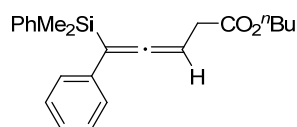

**3ae:** In an oven dried 15 mL Schlenk tube equipped with a stirring bar, 0.02 mmol (2.9 mg, 10 mol%) CuBr and 0.02 mmol (2.1 mg, 10 mol%) Et<sub>3</sub>N were added into 1 mL of dry MeOH under argon atmosphere. The solution was stirred for 5 min at room temperature. Then 0.2 mmol **1ae** (45.7 mg, 1.0 equiv), 0.4 mmol (105 mg, 2.0 equiv) Me<sub>2</sub>PhSi-Bpin were added to the tube under argon atmosphere. The final solution was continued to stir for 24 hours at room temperature. Then the solution was diluted with DCM and filtered through Celite. The final filtrate was concentrated under vacuum to afford the crude product which was isolated through flash column chromatography (Eluent: PE/Et<sub>2</sub>O = 97:3) to furnish the related product **3ae** (68.3 mg) as colorless oil. <sup>1</sup>H NMR (400 MHz, CDCl<sub>3</sub>): δ 7.60 - 7.55 (m, 2H), 7.36 - 7.32 (m, 3H), 7.23 - 7.17 (m, 4H), 7.14 - 7.10 (m, 1H), 5.36 (t, *J* = 7.4 Hz, 1H), 4.10 (t, *J* = 6.7 Hz, 2H), 3.13 (dd, *J* = 16.2, 7.2 Hz, 1H), 3.07 (dd, *J* = 16.2, 7.6 Hz, 1H), 1.65 - 1.55 (m, 2H), 1.37 (dq, *J* = 14.6, 7.3 Hz, 2H), 0.91 (t, *J* = 7.4 Hz, 3H), 0.463 (s, 3H), 0.457 (s, 3H). <sup>13</sup>C NMR (100 MHz, CDCl<sub>3</sub>): δ 211.50, 173.32, 139.92, 138.31, 135.70, 131.02, 130.17, 129.77, 129.70, 128.22, 101.60, 82.98, 66.55, 36.08, 32.45, 20.94, 15.52, 0.00, -0.08. HRMS (ESI): *m/z* calculated for C<sub>23</sub>H<sub>28</sub>O<sub>2</sub>SiNa [M+Na]<sup>+</sup>: 387.1756, found: 387.1765.

#### 1.4 Procedure for synthesis of enantioenriched allenylsilanes.

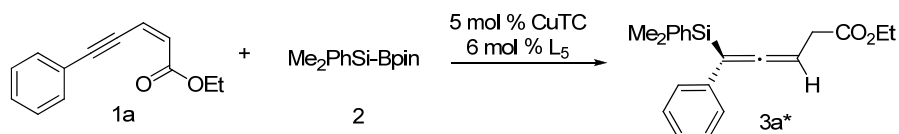

**3a\***: In an oven dried 15 mL Schlenk tube equipped with a stirring bar, 0.01 mmol (1.9 mg, 5 mol%) CuTC and 0.012 mmol (3.6 mg, 6 mol%) ligand L<sub>5</sub> were added into 1 mL of dry <sup>i</sup>AmOH under argon atmosphere. The mixture was stirred for 1 hour at room temperature to form a light green solution. Then the tube was cooled to 0 °C, and 0.2 mmol **1a** (40.4 mg 1.0 equiv,) and 0.3 mmol (79 mg, 1.5 equiv) Me<sub>2</sub>PhSi-Bpin were added to the tube under argon atmosphere. It was continued to

stir for 48 hours at 0 °C. Then the final deep green solution was concentrated under vacuum to afford the crude product which was isolated through flash column chromatography (Eluent: PE/Et<sub>2</sub>O = 97:3) to furnish the related product **3a**<sup>\*</sup> (54.1 mg, 80%) as colorless oil.

$[\alpha]_D^{25} +42.3^\circ$  (c = 1.59, CHCl<sub>3</sub>)

<sup>1</sup>H NMR (400 MHz, CDCl<sub>3</sub>): δ 7.61 - 7.55 (m, 2H), 7.36 - 7.32 (m, 3H), 7.24 - 7.17 (m, 4H), 7.16 - 7.10 (m, 1H), 5.37 (t, *J* = 7.4 Hz, 1H), 4.15 (q, *J* = 7.1 Hz, 2H), 3.15 (dd, *J* = 16.2, 7.2 Hz, 1H), 3.07 (dd, *J* = 16.2, 7.6 Hz, 1H), 1.25 (t, *J* = 7.1 Hz, 3H), 0.463 (s, 3H), 0.458 (s, 3H). <sup>13</sup>C NMR (100 MHz, CDCl<sub>3</sub>): δ 211.53, 173.26, 139.94, 138.32, 135.72, 131.03, 130.18, 129.78, 129.71, 128.24, 101.61, 82.96, 62.64, 36.08, 16.02, 0.00, -0.06.

92% ee, HPLC, IC, Hexane:<sup>i</sup>PrOH = 200:1, 0.6 mL/min: 22.4 min (major), 21.4 min (minor).

HRMS (ESI): *m/z* calculated for C<sub>21</sub>H<sub>24</sub>O<sub>2</sub>SiNa [M+Na]<sup>+</sup>: 359.1443, found: 359.1443.

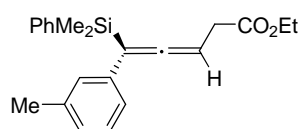

**3b**<sup>\*</sup>: In an oven dried 15 mL Schlenk tube equipped with a stirring bar, 0.01mmol (1.9 mg, 5 mol%) CuTC and 0.012 mmol (3.6 mg, 6 mol%) ligand L<sub>5</sub> were added into 1 mL of dry <sup>t</sup>AmOH under argon atmosphere. The mixture was stirred for 1 hour at room temperature to form a light green solution. Then the tube was cooled to -5 °C, and 0.2 mmol **1b** (1.0 equiv, 42.9 mg) and 0.3 mmol (1.5 equiv, 79 mg) Me<sub>2</sub>PhSi-Bpin were added to the tube under argon atmosphere. It was continued to stir for 72 h at -5 °C. Then the final deep green solution was concentrated under vacuum to afford the crude product which was isolated through flash column chromatography (Eluent: PE/Et<sub>2</sub>O = 97:3) to furnish the related product **3b**<sup>\*</sup> (61.6mg, 87%) as colorless oil.

$[\alpha]_D^{25} +60.5^\circ$  (c = 2.35, CHCl<sub>3</sub>)

<sup>1</sup>H NMR (400 MHz, CDCl<sub>3</sub>): δ 7.54 - 7.47 (m, 2H), 7.31 - 7.25 (m, 3H), 7.02 - 6.98 (m, 2H), 6.91 - 6.86 (m, 2H), 5.27 (t, *J* = 7.4 Hz, 1H), 4.07 (q, *J* = 7.2 Hz, 2H), 3.04

(dd,  $J = 16.2, 7.2$  Hz, 1H), 2.99 (dd,  $J = 16.2, 7.6$  Hz, 1H), 2.17 (s, 3H), 1.17 (t,  $J = 7.1$  Hz, 3H), 0.384 (s, 3H), 0.378 (s, 3H).  $^{13}\text{C}$  NMR (100 MHz,  $\text{CDCl}_3$ ):  $\delta$  211.47, 173.36, 140.10, 139.79, 138.26, 135.79, 131.07, 130.58, 130.10, 129.75, 129.13, 126.92, 101.66, 82.89, 62.68, 36.18, 23.30, 16.09, 0.09, 0.00.

92% ee, HPLC, OD-H, Hexane: $^i$ PrOH = 250:1, 0.7 mL/min: 27.2 min (major), 21.7 min (minor).

HRMS (ESI):  $m/z$  calculated for  $\text{C}_{22}\text{H}_{26}\text{O}_2\text{SiNa}$   $[\text{M}+\text{Na}]^+$ : 373.1600, found: 373.1612.

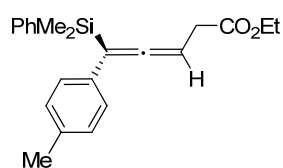

**3c\***: In an oven dried 15 mL Schlenk tube equipped with a stirring bar, 0.01 mmol (1.9 mg, 5 mol%) CuTC and 0.012 mmol (3.6 mg, 6 mol%) ligand **L**<sub>5</sub> were added into 1 mL of dry  $^t$ AmOH under argon atmosphere. The mixture was stirred for 1 hour at room temperature to form a light green solution. Then the tube was cooled to 0 °C, and 0.2 mmol **1c** (1.0 equiv, 42.9 mg) and 0.3 mmol (1.5 equiv, 79 mg) Me<sub>2</sub>PhSi-Bpin were added to the tube under argon atmosphere. It was continued to stir for 48 hours at 0 °C. Then the final deep green solution was concentrated under vacuum to afford the crude product which was isolated through flash column chromatography (Eluent: PE/Et<sub>2</sub>O = 97:3) to furnish the related product **3c\*** (58.1 mg, 87%) as colorless oil.

$[\alpha]_{\text{D}}^{25} +39.4^\circ$  ( $c = 2.36$ ,  $\text{CHCl}_3$ )

$^1\text{H}$  NMR (400 MHz,  $\text{CDCl}_3$ ):  $\delta$  7.40 - 7.38 (m, 2H), 7.17 - 7.13 (m, 3H), 6.92 (d,  $J = 8.1$  Hz, 2H), 6.82 (d,  $J = 8.1$  Hz, 2H), 5.15 (t,  $J = 7.4$  Hz, 1H), 3.96 (q,  $J = 7.1$  Hz, 2H), 2.92 (dd,  $J = 16.2, 7.2$  Hz, 1H), 2.87 (dd,  $J = 16.2, 7.6$  Hz, 1H), 2.08 (s, 3H), 1.06 (t,  $J = 7.1$  Hz, 3H), 0.26 (s, 3H), 0.26 (s, 3H).  $^{13}\text{C}$  NMR (100 MHz,  $\text{CDCl}_3$ ):  $\delta$  211.38, 173.37, 140.13, 138.00, 135.77, 135.23, 131.03, 130.97, 129.74, 129.70, 101.31, 82.96, 62.65, 22.96, 15.97, 0.08, 0.00.

91% ee, HPLC, OD-H, Hexane: $^i$ PrOH = 300:1, 0.6 mL/min: 21.8 min (major), 21.6 min (minor).

HRMS (ESI):  $m/z$  calculated for  $\text{C}_{22}\text{H}_{26}\text{O}_2\text{SiNa}$   $[\text{M}+\text{Na}]^+$ : 373.1600, found: 373.1604.



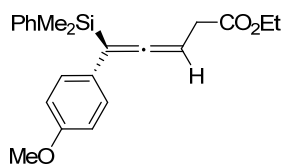

**3d\***: In an oven dried 15 mL Schlenk tube equipped with a stirring bar, 0.01mmol (1.9 mg, 5 mol%) CuTC and 0.012 mmol (3.6 mg, 6 mol%) ligand **L**<sub>5</sub> were added into 1 mL of dry <sup>t</sup>AmOH under argon atmosphere. The mixture was stirred for 1 hour at room temperature to form a light green solution. Then the tube was cooled to 0 °C, and 0.2 mmol **1d** (1.0 equiv, 46.1 mg), 0.3 mmol (1.5 equiv, 79 mg) Me<sub>2</sub>PhSi-Bpin were added to the tube under argon atmosphere. It was continued to stir for 48 hours at 0 °C. Then the final deep green solution was concentrated under vacuum to afford the crude product which was isolated through flash column chromatography (Eluent: PE/Et<sub>2</sub>O = 97:3) to furnish the related product **3d\*** (52.9 mg, 72%) as colorless oil.  $[\alpha]_D^{25} +42.3^\circ$  (c = 1.58, CHCl<sub>3</sub>)

<sup>1</sup>H NMR (400 MHz, CDCl<sub>3</sub>) δ 7.51 - 7.49 (m, 2H), 7.28 - 7.25 (m, 3H), 7.09 - 7.06 (m, 2H), 6.69 - 6.66 (m, 2H), 5.27 (t, *J* = 7.3 Hz, 1H), 4.08 (q, *J* = 7.1 Hz, 2H), 3.66 (s, 3H), 3.04 (dd, *J* = 16.2, 7.2 Hz, 1H), 2.99 (dd, *J* = 16.2, 7.6 Hz, 1H), 1.17 (t, *J* = 7.1 Hz, 3H), 0.38 (s, 3H), 0.38 (s, 3H). <sup>13</sup>C NMR (100 MHz, CDCl<sub>3</sub>): δ 211.11, 173.39, 160.15, 140.10, 135.75, 131.04, 130.86, 130.34, 129.75, 115.72, 100.88, 83.04, 62.63, 57.06, 36.26, 16.13, 0.07, 0.00.

90% ee, HPLC, OD-H, Hexane:<sup>i</sup>PrOH = 250:1, 0.7 mL/min, 60.1min (major), 55.7 min (minor).

HRMS (ESI): *m/z* calculated for C<sub>22</sub>H<sub>26</sub>O<sub>3</sub>SiNa [M+Na]<sup>+</sup>:385.1549, found: 385.1512.

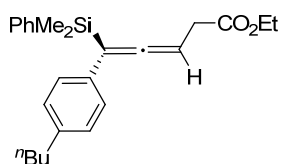

**3e\***: In an oven dried 15 mL Schlenk tube equipped with a stirring bar, 0.01mmol (1.9 mg, 5 mol%) CuTC, 0.012 mmol (3.6 mg, 6 mol%) ligand **L**<sub>5</sub> were added into 1 mL of dry <sup>t</sup>AmOH under argon atmosphere. The mixture was stirred for 1 hour at room temperature to form a light green solution. Then the tube was cooled to -5 °C,

and 0.2 mmol **1e** (1.0 equiv, 51.3 mg), 0.3 mmol (1.5 equiv, 79 mg) Me<sub>2</sub>PhSi-Bpin were added to the tube under argon atmosphere. It was continued to stir for 48 hours at -5 °C. Then the final deep green solution was concentrated under vacuum to afford the crude product which was isolated through flash column chromatography (Eluent: PE/Et<sub>2</sub>O = 97:3) to furnish the related product **3e**<sup>\*</sup> (57.1 mg, 73%) as colorless oil.  $[\alpha]_D^{25} +36.7^\circ$  (c = 2.59, CHCl<sub>3</sub>).

<sup>1</sup>H NMR (400 MHz, CDCl<sub>3</sub>) δ 7.60 - 7.58 (m, 2H), 7.38 - 7.34 (m, 3H), 7.15 - 7.13 (m, 2H), 7.04 - 7.00 (m, 2H), 5.36 (t, *J* = 7.4 Hz, 1H), 4.17 (q, *J* = 6.9 Hz, 2H), 3.13 (dd, *J* = 16.2, 7.2 Hz, 1H), 3.07 (dd, *J* = 16.2, 7.6 Hz, 1H), 2.58 - 2.51 (m, 2H), 1.58 - 1.51 (m, 2H), 1.35 - 1.29 (m, 2H), 1.26 (t, *J* = 7.3 Hz, 3H), 0.90 (t, *J* = 7.3 Hz, 3H), 0.47 (s, 3H), 0.47 (s, 3H). <sup>13</sup>C NMR (100 MHz, CDCl<sub>3</sub>): δ 211.33, 173.29, 142.97, 140.07, 135.68, 135.26, 130.92, 130.22, 129.64, 129.57, 101.23, 82.87, 62.56, 37.00, 36.12, 35.30, 24.11, 15.97, 15.71, 0.00, -0.07.

93% ee, HPLC, OD-H, Hexane:<sup>i</sup>PrOH = 250:1, 0.7 mL/min: 23.0 min (major), 25.1 min (minor).

HRMS (ESI): *m/z* calculated for C<sub>25</sub>H<sub>32</sub>O<sub>2</sub>SiNa [M+Na]<sup>+</sup>: 415.2069, found: 415.2079.

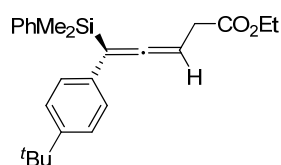

**3f**<sup>\*</sup>: In an oven dried 15 mL Schlenk tube equipped with a stirring bar, 0.01 mmol (1.9 mg, 5 mol%) CuTC, 0.012 mmol (3.6 mg, 6 mol%) ligand L<sub>5</sub> were added into 1 mL of dry <sup>t</sup>AmOH under argon atmosphere. The mixture was stirred for 1 hour at room temperature to form a light green solution. Then the tube was cooled to 0 °C, and 0.2 mmol **1f** (1.0 equiv, 51.3 mg), 0.3 mmol (1.5 equiv, 79 mg) Me<sub>2</sub>PhSi-Bpin were added to the tube under argon atmosphere. It was continued to stir for 48 hours at 0 °C. Then the final deep green solution was concentrated under vacuum to afford the crude product which was isolated through flash column chromatography (Eluent: PE/Et<sub>2</sub>O = 97:3) to furnish the related product **3e**<sup>\*</sup> (55.9 mg, 71%) as colorless oil.  $[\alpha]_D^{25} +39.4^\circ$  (c = 2.36, CHCl<sub>3</sub>).

$^1\text{H}$  NMR (400 MHz,  $\text{CDCl}_3$ ):  $\delta$  7.63 - 7.56 (m, 2H), 7.40 - 7.31 (m, 3H), 7.26 - 7.20 (m, 2H), 7.20 - 7.12 (m, 2H), 5.35 (t,  $J$  = 7.4 Hz, 1H), 4.15 (q,  $J$  = 7.1 Hz, 2H), 3.11 (dd,  $J$  = 16.2, 7.2 Hz, 1H), 3.06 (dd,  $J$  = 16.2, 7.6 Hz, 1H), 1.27 - 1.23 (m, 12H), 0.46 (s, 3H), 0.46 (s, 3H).  $^{13}\text{C}$  NMR (100 MHz,  $\text{CDCl}_3$ ):  $\delta$  211.52, 173.30, 151.19, 140.16, 135.73, 135.07, 130.97, 129.69, 129.40, 127.14, 101.14, 82.95, 62.60, 36.23, 36.17, 33.10, 16.02, 0.07, 0.00.

91% ee, HPLC, OD-H, Hexane:*i*PrOH = 300:1, 0.6 mL/min: 12.0 min (major), 13.1 min (minor).

HRMS (ESI):  $m/z$  calculated for  $\text{C}_{25}\text{H}_{32}\text{O}_2\text{SiNa}$   $[\text{M}+\text{Na}]^+$ : 415.2069, found: 415.2074.

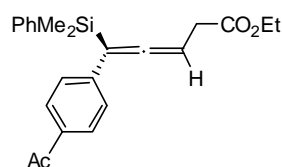

**3h\***: In an oven dried 15 mL Schlenk tube equipped with a stirring bar, 0.01 mmol (1.9 mg, 5 mol%) CuTC, 0.012 mmol (3.6 mg, 6 mol%) ligand **L**<sub>5</sub> were added into 1 mL of dry *t*AmOH under argon atmosphere. The mixture was continued to stir for 1 hour at room temperature to form a light green solution. Then the tube was cooled to 0 °C, and 0.2 mmol **1h** (1.0 equiv, 48.5 mg), 0.3 mmol (1.5 equiv, 79 mg) Me<sub>2</sub>PhSi-Bpin were added to the tube under argon atmosphere. It was continued to stir for 72 hours at 0 °C. Then the final deep green solution was concentrated under vacuum to afford the crude product which was isolated through flash column chromatography (Eluent: PE/Et<sub>2</sub>O = 97:3) to furnish the related product **3h\*** (48.3 mg, 64%) as colorless oil.

$[\alpha]_{\text{D}}^{25} +61.5^\circ$  ( $c$  = 1.53,  $\text{CHCl}_3$ ).

$^1\text{H}$  NMR (400 MHz,  $\text{CDCl}_3$ )  $\delta$  7.80 - 7.78 (m, 2H), 7.68 - 7.55 (m, 2H), 7.40 - 7.34 (m, 3H), 7.30 - 7.28 (m, 2H), 5.43 (t,  $J$  = 7.4 Hz, 1H), 4.17 (q,  $J$  = 7.1 Hz, 2H), 3.14 (dd,  $J$  = 16.2, 7.2 Hz, 1H), 3.09 (dd,  $J$  = 16.2, 7.6 Hz, 1H), 2.53 (s, 3H), 1.25 (d,  $J$  = 7.1 Hz, 3H), 0.47 (s, 3H), 0.47 (s, 3H).  $^{13}\text{C}$  NMR (100 MHz,  $\text{CDCl}_3$ ):  $\delta$  212.58, 199.57, 173.17, 144.06, 139.55, 137.11, 135.84, 135.50, 131.43, 130.50, 130.01, 101.73, 83.84, 62.97, 36.14, 28.13, 16.46, 0.08, 0.00.

93% ee, HPLC, IC, Hexane:<sup>i</sup>PrOH = 99:1, 0.6 mL/min: 42.4 min (major), 38.9 min (minor).

HRMS (ESI): *m/z* calculated for C<sub>23</sub>H<sub>26</sub>O<sub>3</sub>SiNa [M+Na]<sup>+</sup>: 401.1549, found: 401.1551.

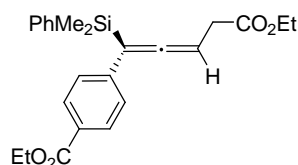

**3i\***: In an oven dried 15 mL Schlenk tube equipped with a stirring bar, 0.01mmol (1.9 mg, 5 mol%) CuTC, 0.012 mmol (3.6 mg, 6 mol%) ligand L<sub>5</sub> were added into 1 mL of dry <sup>t</sup>AmOH under argon atmosphere. The mixture was stirred for 1 hour at room temperature to form a light green solution. Then the tube was cooled to -5 °C, and 0.2 mmol **1i** (1.0 equiv, 54.5 mg), 0.3 mmol (1.5 equiv, 79 mg) Me<sub>2</sub>PhSi-Bpin were added to the tube under argon atmosphere. It was continued to stir for 72 hours at -5 °C. Then the final deep green solution was concentrated under vacuum to afford the crude product which was isolated through flash column chromatography (Eluent: PE/Et<sub>2</sub>O = 97:3) to furnish the related product **3i\*** (59.8 mg, 74%) as colorless oil. [α]<sub>D</sub><sup>25</sup> +58.2° (c = 2.22, CHCl<sub>3</sub>).

<sup>1</sup>H NMR (400 MHz, CDCl<sub>3</sub>): δ 7.89 - 7.84 (m, 2H), 7.59 - 7.53 (m, 2H), 7.40 - 7.34 (m, 3H), 7.29 - 7.23 (m, 2H), 5.42 (t, *J* = 7.4 Hz, 1H), 4.33 (q, *J* = 7.1 Hz, 2H), 4.16 (q, *J* = 7.1 Hz, 2H), 3.14 (dd, *J* = 16.2, 7.2 Hz, 1H), 3.08 (dd, *J* = 16.2, 7.6 Hz, 1H), 1.35 (t, *J* = 7.1 Hz, 3H), 1.26 (t, *J* = 7.1 Hz, 3H), 0.47 (s, 3H), 0.47 (s, 3H). <sup>13</sup>C NMR (100 MHz, CDCl<sub>3</sub>) : δ 212.35, 173.12, 168.38, 143.61, 139.52, 135.77, 131.55, 131.32, 130.29, 129.92, 129.73, 101.64, 83.51, 62.82, 62.71, 35.92, 16.24, 16.13, 0.00, -0.08.

90% ee, HPLC, OD-H, Hexane:<sup>i</sup>PrOH = 250:1, 0.7 mL/min, 34.2 min (major), 31.9 min (minor).

HRMS (ESI): *m/z* calculated for C<sub>24</sub>H<sub>28</sub>O<sub>4</sub>SiNa [M+Na]<sup>+</sup>: 431.1655, found: 431.1655.

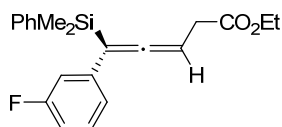

**3k\***: In an oven dried 15 mL Schlenk tube equipped with a stirring bar, 0.01mmol (1.9 mg, 5 mol%) CuTC, 0.012 mmol (3.6 mg, 6 mol%) ligand L<sub>5</sub> were added into 1 mL of dry <sup>t</sup>AmOH under argon atmosphere. The mixture was stirred for 1 hour at room temperature to form a light green solution. Then the tube was cooled to -5 °C, and 0.2 mmol **1k** (1.0 equiv 43.7 mg), 0.3 mmol (1.5 equiv, 79 mg) Me<sub>2</sub>PhSi-Bpin were added to the tube under argon atmosphere. It was continued to stir for 72 hours at -5 °C. Then the final deep green solution was concentrated under vacuum to afford the crude product which was isolated through flash column chromatography (Eluent: PE/Et<sub>2</sub>O = 97:3) to furnish the related product **3k\*** (54.1 mg, 76%) as colorless oil.  $[\alpha]_D^{25} +43.9^\circ$  (c = 2.02, CHCl<sub>3</sub>).

<sup>1</sup>H NMR (400 MHz, CDCl<sub>3</sub>): δ 7.59 - 7.56 (m, 2H), 7.38 - 7.35 (m, 3H), 7.18 - 7.12 (m, 1H), 6.97 - 6.93 (m, 2H), 6.86 - 6.81 (m, 1H), 5.41 (t, *J* = 7.4 Hz, 1H), 4.17 (q, *J* = 7.2 Hz, 2H), 3.14 (dd, *J* = 16.2, 7.2 Hz, 1H), 3.08 (dd, *J* = 16.2, 7.6 Hz, 1H), 1.27 (t, *J* = 7.1 Hz, 3H), 0.47 (s, 3H), 0.47 (s, 3H). <sup>13</sup>C NMR (100 MHz, CDCl<sub>3</sub>): δ 211.92, 173.21, 164.80 (d, *J* = 245.4 Hz), 141.02 (d, *J* = 7.5 Hz), 139.62, 135.83, 131.61 (d, *J* = 8.3 Hz), 131.35, 129.96, 125.60 (d, *J* = 2.8 Hz), 116.65 (d, *J* = 21.9 Hz), 115.29 (d, *J* = 21.3 Hz), 101.32, 83.56, 62.89, 36.07, 16.16, 0.06, 0.00.

91% ee, HPLC, OD-H, Hexane:PrOH = 250:1, 0.7 mL/min, 37.0 min (major), 32.3 min (minor).

HRMS (ESI): *m/z* calculated for C<sub>21</sub>H<sub>23</sub>FO<sub>2</sub>SiNa [M+Na]<sup>+</sup>:377.1349, found: 377.1341.

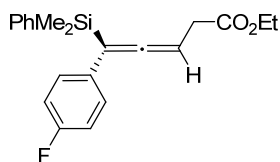

**3l\***: In an oven dried 15 mL Schlenk tube equipped with a stirring bar, 0.01mmol (1.9 mg, 5 mol%) CuTC, 0.012 mmol (3.6 mg, 6 mol%) ligand L<sub>5</sub> were added into 1 mL of dry <sup>t</sup>AmOH under argon atmosphere. The mixture was stirred for 1 hour at room

temperature to form a light green solution. Then the tube was cooled to -5 °C, and 0.2 mmol **11** (1.0 equiv, 43.7 mg), 0.3 mmol (1.5 equiv, 79 mg) Me<sub>2</sub>PhSi-Bpin were added to the tube under argon atmosphere. It was continued to stir for 96 hours at -5 °C. Then the final deep green solution was concentrated under vacuum to afford the crude product which was isolated through flash column chromatography (Eluent: PE/Et<sub>2</sub>O = 97:3) to furnish the related product **31**<sup>\*</sup> (64.1 mg, 90%) as colorless oil.  $[\alpha]_D^{25} +47.2^\circ$  (c = 2.20, CHCl<sub>3</sub>).

<sup>1</sup>H NMR (400 MHz, CDCl<sub>3</sub>) δ 7.57 - 7.55 (m, 2H), 7.37 - 7.34 (m, 3H), 7.17 - 7.14 (m, 2H), 6.92 - 6.86 (m, 2H), 5.37 (t, *J* = 7.4 Hz, 1H), 4.16 (q, *J* = 7.1 Hz, 2H), 3.12 (dd, *J* = 16.2, 7.2 Hz, 1H), 3.07 (dd, *J* = 16.2, 7.2 Hz, 1H), 1.25 (t, *J* = 7.1 Hz, 3H), 0.45 (s, 3H), 0.45 (s, 3H). <sup>13</sup>C NMR (100 MHz, CDCl<sub>3</sub>) δ 211.57, 173.36, 163.58 (d, *J* = 245.6 Hz), 139.82, 135.85, 134.36 (d, *J* = 3.3 Hz), 131.41, 131.33, 129.96, 117.23 (d, *J* = 21.4 Hz), 100.94, 83.32, 62.84, 36.21, 16.18, 0.06, 0.00.

90% ee, HPLC, OD-H, Hexane:<sup>t</sup>PrOH = 250:1, 0.6 mL/min, 18.1 min (major), 18.7 min (minor).

HRMS (ESI): *m/z* calculated for C<sub>21</sub>H<sub>23</sub>FO<sub>2</sub>SiNa [M+Na]<sup>+</sup>: 377.1349, found: 377.1355.

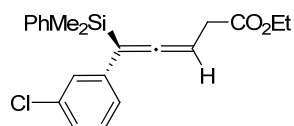

**3m**<sup>\*</sup>: In an oven dried 15 mL Schlenk tube equipped with a stirring bar, 0.01mmol (1.9 mg, 5 mol%) CuTC, 0.012 mmol (3.6 mg, 6 mol%) ligand L<sub>5</sub> were added into 1 mL of dry <sup>t</sup>AmOH under argon atmosphere. The mixture was stirred for 1 hour at room temperature to form a light green solution. Then the tube was cooled to -5 °C, and 0.2 mmol **1m** (1.0 equiv, 47.0 mg), 0.3 mmol (1.5 equiv, 79 mg) Me<sub>2</sub>PhSi-Bpin were added to the tube under argon atmosphere. It was continued to stir for 72 hours at -5 °C. Then the final deep green solution was concentrated under vacuum to afford the crude product which was isolated through flash column chromatography (Eluent: PE/Et<sub>2</sub>O = 97:3) to furnish the related product **3m**<sup>\*</sup> (62.9 mg, 85%) as colorless oil.  $[\alpha]_D^{25} +54.7^\circ$  (c = 2.04, CHCl<sub>3</sub>)

$^1\text{H}$  NMR (400 MHz,  $\text{CDCl}_3$ ):  $\delta$  7.59 - 7.57(m, 2H), 7.39 - 7.37 (m, 3H), 7.26 - 7.25 (m, 1H), 7.12 - 7.11(m, 2H), 7.06 - 7.02 (m, 1H), 5.41 (t,  $J$  = 7.4 Hz, 1H), 4.22 - 4.15 (m, 2H), 3.14 (dd,  $J$  = 16.2, 7.2 Hz, 1H), 3.09 (dd,  $J$  = 16.2, 7.6 Hz, 1H), 1.27 (t,  $J$  = 7.1 Hz, 3H), 0.48 (s, 3H), 0.48 (s, 3H).  $^{13}\text{C}$  NMR (100 MHz,  $\text{CDCl}_3$ ):  $\delta$  211.83, 173.15, 140.57, 139.51, 136.16, 135.78, 131.41, 131.33, 129.92, 129.87, 128.43, 127.94, 101.13, 83.56, 62.86, 36.03, 16.14, 0.00, -0.07.

92% ee, HPLC, OD-H, Hexane: $i$ PrOH = 250:1, 0.7 mL/min, 41.4 min (major), 30.6 min (minor).

HRMS (ESI):  $m/z$  calculated for  $\text{C}_{21}\text{H}_{23}\text{ClO}_2\text{SiNa}$   $[\text{M}+\text{Na}]^+$ : 393.1053, found: 393.1054.

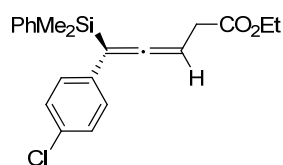

**3n\***: In an oven dried 15 mL Schlenk tube equipped with a stirring bar, 0.01mmol (1.9 mg, 5 mol%) CuTC, 0.012 mmol (3.6 mg, 6 mol%) ligand **L**<sub>5</sub> were added into 1 mL of dry  $t$ AmOH under argon atmosphere. The mixture was continued to stir for 1 hour at room temperature to form a light green solution. Then the tube was cooled to -5 °C, and 0.2 mmol **1n** (1.0 equiv, 47.0 mg), 0.3 mmol (1.5 equiv, 79 mg) Me<sub>2</sub>PhSi-Bpin were added to the tube under argon atmosphere. It was continued to stir for 96 hours at -5 °C. Then the final deep green solution was concentrated under vacuum to afford the crude product which was isolated through flash column chromatography (Eluent: PE/Et<sub>2</sub>O = 97:3) to furnish the related product **3n\*** (61.6 mg, 83%) as colorless oil.

$[\alpha]_{\text{D}}^{25} +53.7^\circ$  ( $c$  = 2.40,  $\text{CHCl}_3$ ).

$^1\text{H}$  NMR (400 MHz,  $\text{CDCl}_3$ ):  $\delta$  7.49 - 7.47 (m 2H), 7.30 - 7.27(m, 3H), 7.09 - 7.04 (m, 4H), 5.31 (t,  $J$  = 7.4 Hz, 1H), 4.08 (q,  $J$  = 7.1 Hz, 2H), 3.05 (dd,  $J$  = 16.2, 7.2 Hz, 1H), 3.00 (dd,  $J$  = 16.2, 7.6Hz, 1H), 1.18 (t,  $J$  = 7.1 Hz, 3H), 0.38 (s, 3H), 0.38 (s, 3H).  $^{13}\text{C}$  NMR (100 MHz,  $\text{CDCl}_3$ ):  $\delta$  211.70, 173.21, 139.63, 136.99, 135.78, 134.12, 131.30, 131.10, 130.43, 129.92, 100.96, 83.44, 62.87, 36.04, 16.06, 0.00, -0.08.

90% ee, HPLC, OD-H, Hexane:*i*PrOH = 550:1, 0.5 mL/min, 36.7 min (major), 40.1 min (minor).

HRMS (ESI): *m/z* calculated for C<sub>21</sub>H<sub>23</sub>ClO<sub>2</sub>SiNa [M+Na]<sup>+</sup>:393.1053, found: 393.1048.

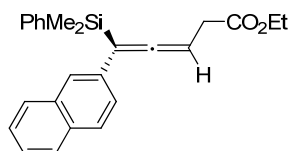

**3q**<sup>\*</sup>: In an oven dried 15 mL Schlenk tube equipped with a stirring bar, 0.01mmol (1.9 mg, 5 mol%) CuTC, 0.012 mmol (3.6 mg, 6 mol%) ligand L<sub>5</sub> were added into 1 mL of dry *t*AmOH under argon atmosphere. The mixture was stirred for one hour at room temperature to form a light green solution. Then the tube was cooled to 0 °C, and 0.2 mmol **1q** (1.0 equiv 50.1 mg), 0.3 mmol (1.5 equiv, 79 mg) Me<sub>2</sub>PhSi-Bpin were added to the tube under argon atmosphere. It was continued to stir for 48 hours at 0 °C. Then the final deep green solution was concentrated under vacuum to afford the crude product which was isolated through flash column chromatography (Eluent: PE/Et<sub>2</sub>O = 97:3) to furnish the related product **3q**<sup>\*</sup> (54.6 mg, 71%) as colorless oil. [α]<sub>D</sub><sup>25</sup> +50° (c = 0.55, CHCl<sub>3</sub>).

<sup>1</sup>H NMR (400 MHz, CDCl<sub>3</sub>): δ 7.68 - 7.64 (m, 1H), 7.61 (d, *J* = 8.2 Hz, 1H), 7.57 - 7.52 (m, 3H), 7.48 (d, *J* = 1.2 Hz, 1H), 7.37 (dd, *J* = 8.5, 1.8 Hz, 1H), 7.32 - 7.26 (m, 5H), 5.36 (t, *J* = 7.4 Hz, 1H), 4.09 (q, *J* = 7.1 Hz, 2H), 3.09 (dd, *J* = 16.2, 7.2 Hz, 1H), 3.03 (dd, *J* = 16.2, 7.6 Hz, 1H), 1.19 (d, *J* = 7.1 Hz, 3H), 0.44 (s, 3H), 0.44 (s, 3H).

<sup>13</sup>C NMR (100 MHz, CDCl<sub>3</sub>): δ 212.00, 173.23, 139.93, 135.76, 135.72, 135.26, 133.98, 131.10, 129.76, 129.72, 129.63, 129.31, 128.36, 128.29, 127.74, 127.36, 101.84, 83.29, 62.65, 36.10, 16.03, 0.09, 0.00.

93% ee, HPLC, IC, Hexane:EA = 200:1, 0.6 mL/min, 18.2 min (major), 20.2 min (minor).

HRMS (ESI): *m/z* calculated for C<sub>25</sub>H<sub>26</sub>O<sub>2</sub>SiNa [M+Na]<sup>+</sup>: 409.1600, found:409.1602.



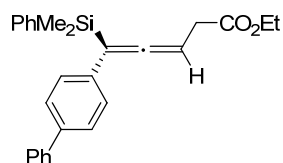

**3r\***: In an oven dried 15 mL Schlenk tube equipped with a stirring bar, 0.01mmol (1.9 mg, 5 mol%) CuTC, 0.012 mmol (3.6 mg, 6 mol%) ligand L<sub>5</sub> were added into 1 mL of dry <sup>t</sup>AmOH under argon atmosphere. The mixture was stirred for one hour at room temperature to form a light green solution. Then the tube was cooled to -5 °C, and 0.2 mmol **1r** (1.0 equiv, 55.3 mg), 0.3 mmol (1.5 equiv, 79 mg) Me<sub>2</sub>PhSi-Bpin were added to the tube under argon atmosphere. It was continued to stir for 72 hours at -5 °C. Then the final deep green solution was concentrated under vacuum to afford the crude product which was isolated through flash column chromatography (Eluent: PE/Et<sub>2</sub>O = 97:3) to furnish the related product **3r\*** (61.9, 75%) as colorless oil.

$[\alpha]_D^{25} +66.3^\circ$  (c = 2.32, CHCl<sub>3</sub>).

<sup>1</sup>H NMR (400 MHz, CDCl<sub>3</sub>) δ 7.61 - 7.59 (m, 2H), 7.55 - 7.51 (m, 2H), 7.45 - 7.43 (m, 2H), 7.41 - 7.34 (m, 5H), 7.31 - 7.28 (m, 3H), 5.40 (t, *J* = 7.4 Hz, 1H), 4.16 (q, *J* = 7.1 Hz, 2H), 3.14 (dd, *J* = 16.2, 7.2 Hz, 1H), 3.09 (dd, *J* = 16.2, 7.6 Hz, 1H), 1.26 (t, *J* = 7.1 Hz, 3H), 0.49 (s, 3H), 0.49 (s, 3H). <sup>13</sup>C NMR (100 MHz, CDCl<sub>3</sub>): δ 211.73, 173.23, 142.58, 141.06, 139.92, 137.32, 135.75, 131.10, 130.54, 130.18, 129.77, 128.96, 128.91, 128.70, 101.29, 83.19, 62.67, 36.09, 16.05, 0.08, 0.00.

90% ee, HPLC, OD-H, Hexane:<sup>i</sup>PrOH = 200:1, 0.6 mL/min, 15.2min (major), 16.5 min (minor).

HRMS (ESI): *m/z* calculated for C<sub>27</sub>H<sub>28</sub>O<sub>2</sub>SiNa [M+Na]<sup>+</sup>: 435.1756, found: 435.1765.

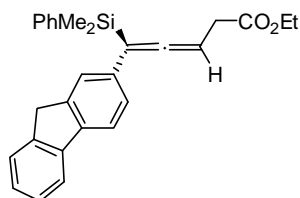

**3s\***: In an oven dried 15 mL Schlenk tube equipped with a stirring bar, 0.01mmol (1.9 mg, 5 mol%) CuTC, 0.012 mmol (3.6 mg, 6 mol%) ligand L<sub>5</sub> were added into 1 mL

of dry  $^t$ AmOH under argon atmosphere. The mixture was stirred for one hour at room temperature to form a light green solution. Then the tube was cooled to  $-5\text{ }^{\circ}\text{C}$ , and 0.2 mmol **1s** (1.0 equiv, 58.0 mg), 0.3 mmol (1.5 equiv, 79 mg)  $\text{Me}_2\text{PhSi-Bpin}$  were added to the tube under argon atmosphere. It was continued to stir for 72 hours at  $-5\text{ }^{\circ}\text{C}$ . Then the final deep green solution was concentrated under vacuum to afford the crude product which was isolated through flash column chromatography (Eluent:  $\text{PE/Et}_2\text{O} = 97:3$ ) to furnish the related product **3s\*** (53.5 mg, 63%) as colorless oil.  $[\alpha]_{\text{D}}^{25} +59.6^{\circ}$  ( $c = 1.90$ ,  $\text{CHCl}_3$ ).

$^1\text{H}$  NMR (400 MHz,  $\text{CDCl}_3$ )  $\delta$  7.68 (d,  $J = 7.5$  Hz, 1H), 7.61 - 7.58 (m, 3H), 7.47 (d,  $J = 7.1$  Hz, 1H), 7.42 (s, 1H), 7.36 - 7.31 (m, 4H), 7.26 - 7.19 (m, 2H), 5.40 (t,  $J = 7.4$  Hz, 1H), 4.16 (q,  $J = 7.1$  Hz, 2H), 3.79 (s, 2H), 3.20 - 3.06 (m, 2H), 1.25 (t,  $J = 7.1$  Hz, 3H), 0.49 (s, 6H), 0.49 (s, 3H).  $^{13}\text{C}$  NMR (100 MHz,  $\text{CDCl}_3$ ):  $\delta$  211.38, 173.14, 145.17, 144.96, 143.13, 141.86, 139.88, 136.67, 135.61, 130.90, 129.59, 128.38, 128.37, 128.17, 126.61, 126.24, 121.39, 121.35, 101.81, 82.90, 62.49, 38.53, 36.02, 15.91, 0.00, -0.08.

91% ee, HPLC, AS-H, Hexane: $^i$ PrOH = 330:1, 0.4 mL/min, 20.9 min (major), 23.1 min (minor).

HRMS (ESI):  $m/z$  calculated for  $\text{C}_{28}\text{H}_{28}\text{O}_2\text{SiNa}$   $[\text{M}+\text{Na}]^+$ : 447.1756, found: 447.1773.

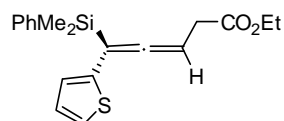

**3t\***: In an oven dried 15 mL Schlenk tube equipped with a stirring bar, 0.01mmol (1.9 mg, 5 mol%)  $\text{CuTC}$ , 0.012 mmol (3.6 mg, 6 mol%) ligand  $\text{L}_5$  were added into 1 mL of dry  $^t$ AmOH under argon atmosphere. The mixture was stirred for one hour at room temperature to form a light green solution. Then the tube was cooled to  $-5\text{ }^{\circ}\text{C}$ , and 0.2 mmol **1t** (1.0 equiv, 41.3 mg), 0.3 mmol (1.5 equiv, 79 mg)  $\text{Me}_2\text{PhSi-Bpin}$  were added to the tube under argon atmosphere. It was continued to stir for 72 hours at  $-5\text{ }^{\circ}\text{C}$ . Then the final deep green solution was concentrated under vacuum to afford the crude product which was isolated through flash column chromatography (Eluent:

PE/Et<sub>2</sub>O = 97:3) to furnish the related product **3t**<sup>\*</sup> (35.6 mg, 52%) as colorless oil.  $[\alpha]_D^{25} +81.7^\circ$  (c = 1.67, CHCl<sub>3</sub>).

<sup>1</sup>H NMR (400 MHz, CDCl<sub>3</sub>) δ 7.63 - 7.60 (m, 2H), 7.41 - 7.34 (m, 3H), 7.11 - 7.10 (m, 1H), 6.83 (dd, *J* = 5.2, 3.6 Hz, 1H), 6.69 - 6.68 (m, 1H), 5.43 (t, *J* = 7.4 Hz, 1H), 4.18 (q, *J* = 7.1 Hz, 2H), 3.14 (dd, *J* = 16.2, 7.2 Hz, 1H), 3.08 (dd, *J* = 16.2, 7.6 Hz, 1H) 1.27 (t, *J* = 7.1 Hz, 3H), 0.52 (s, 6H). <sup>13</sup>C NMR (100 MHz, CDCl<sub>3</sub>): δ 211.13, 173.28, 142.19, 139.47, 136.07, 131.50, 130.01, 129.35, 127.24, 126.52, 96.80, 84.22, 62.95, 36.33, 16.32, 0.09, 0.00.

90% ee, HPLC, OD-H, Hexane:<sup>t</sup>PrOH = 250:1, 0.6 mL/min, 36.9 min (major), 32.0 min (minor).

HRMS (ESI): *m/z* calculated for C<sub>19</sub>H<sub>22</sub>O<sub>2</sub>SiNa [M+Na]<sup>+</sup>: 387.1756, found: 387.1747.

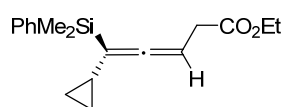

**3u**<sup>\*</sup>: In an oven dried 15 mL Schlenk tube equipped with a stirring bar, 0.01mmol (1.9 mg, 5 mol%) CuTC, 0.012 mmol (3.6 mg, 6 mol%) ligand L<sub>5</sub> were added into 1 mL of dry <sup>t</sup>AmOH under argon atmosphere. The mixture was stirred for one hour at room temperature to form a light green solution. Then the tube was cooled to -5 °C, and 0.2 mmol **1u** (1.0 equiv, 32.8 mg), 0.3 mmol (1.5 equiv, 79 mg) Me<sub>2</sub>PhSi-Bpin were added to the tube under argon atmosphere. It was continued to stir for 72 hours at -5 °C. Then the final deep green solution was concentrated under vacuum to afford the crude product which was isolated through flash column chromatography (Eluent: PE/Et<sub>2</sub>O = 97:3) to furnish the related product **3u**<sup>\*</sup> (47.4 mg, 75%) as colorless oil.  $[\alpha]_D^{25} +4.2^\circ$  (c = 1.71, CHCl<sub>3</sub>).

<sup>1</sup>H NMR (400 MHz, CDCl<sub>3</sub>): δ 7.59 - 7.56 (m, 2H), 7.37 - 7.34 (m, 3H), 5.06 (td, *J* = 7.3, 1.8 Hz, 1H), 4.14 (q, *J* = 7.1 Hz, 2H), 2.95 (dd, *J* = 16.2, 7.2 Hz, 1H), 2.90 (dd, *J* = 16.2, 7.6 Hz, 1H), 1.26 (t, *J* = 7.1 Hz, 4H), 1.07 - 1.00 (m, 1H), 0.64 - 0.60 (m, 2H), 0.46 - 0.34 (m, 8H). <sup>13</sup>C NMR (100 MHz, CDCl<sub>3</sub>): δ 204.78, 171.75, 138.00, 133.89, 129.08, 127.71, 101.14, 81.45, 60.63, 34.79, 14.21, 9.56, 8.22, 7.82, -2.83, -2.89.

73% ee, HPLC, IC, Hexane:*i*PrOH = 300:1, 0.6 mL/min, 18.8 min (major), 17.9 min (minor).

HRMS (ESI): *m/z* calculated for C<sub>18</sub>H<sub>24</sub>O<sub>2</sub>SiNa [M+Na]<sup>+</sup>: 323.1443, found: 323.1442.

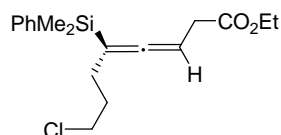

**3x<sup>\*</sup>**: In an oven dried 15 mL Schlenk tube equipped with a stirring bar, 0.01mmol (1.9 mg, 5 mol%) CuTC, 0.012 mmol (3.6 mg, 6 mol%) ligand L<sub>5</sub> were added into 1 mL of dry *t*AmOH under argon atmosphere. The mixture was stirred for one hour at room temperature to form a light green solution. Then the tube was cooled to -5 °C, and 0.2 mmol **1x** (1.0 equiv, 40.2 mg), 0.3 mmol (1.5 equiv, 79 mg) Me<sub>2</sub>PhSi-Bpin were added to the tube under argon atmosphere. It was continued to stir for 72 hours at -5 °C. Then the final deep green solution was concentrated under vacuum to afford the crude product which was isolated through flash column chromatography (Eluent: PE/Et<sub>2</sub>O = 97:3) to furnish the related product **3x<sup>\*</sup>** (51.0 mg, 76%) as colorless oil. [α]<sub>D</sub><sup>25</sup> -0.95° (c = 2.33, CHCl<sub>3</sub>).

<sup>1</sup>H NMR (400 MHz, CDCl<sub>3</sub>) δ 7.52 - 7.50 (m, 2H), 7.36 - 7.35(m, 3H), 5.08 - 5.02 (m, 1H), 4.14 (q, *J* = 7.1 Hz, 2H), 3.49 (t, *J* = 6.5 Hz, 2H), 2.97 (dd, *J* = 7.4, 2.1 Hz, 2H), 2.08 - 2.04 (m, 2H), 1.91 - 1.84 (m, 2H), 1.26 (t, *J* = 7.1 Hz, 3H), 0.38 (s, 6H). <sup>13</sup>C NMR (100 MHz, CDCl<sub>3</sub>): δ 206.49, 171.69, 137.51, 133.75, 129.23, 127.83, 95.66, 80.36, 60.70, 44.51, 34.59, 31.58, 26.20, 14.22, -3.15, -3.21.

68% ee, HPLC, IC , Hexane:*i*PrOH = 300:1, 0.6 mL/min, 49.3 min (major), 50.5 min (minor).

HRMS (ESI): *m/z* calculated for C<sub>18</sub>H<sub>25</sub>ClO<sub>2</sub>SiNa [M+Na]<sup>+</sup>:359.1210, found: 359.1203.

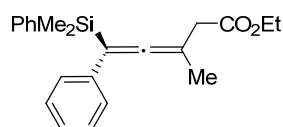

**3ab\*:** In an oven dried 15 mL Schlenk tube equipped with a stirring bar, 0.01mmol (1.9 mg, 5 mol%) CuTC, 0.012 mmol (3.6 mg, 6 mol%) ligand L<sub>5</sub> were added into 1 mL of dry <sup>t</sup>AmOH under argon atmosphere. The mixture was stirred for one hour at room temperature to form a light green solution. Then the tube was cooled to 0 °C, and 0.2 mmol **1ab** (1.0 equiv 42.9 mg), 0.3 mmol (1.5 equiv, 79 mg) Me<sub>2</sub>PhSi-Bpin were added to the tube under argon atmosphere. It was continued to stir for 48 hours at 0 °C. Then the final deep green solution was concentrated under vacuum to afford the crude product which was isolated through flash column chromatography (Eluent: PE/Et<sub>2</sub>O = 97:3) to furnish the related product **3ab**<sup>\*</sup> (52.1 mg, 74%) as colorless oil.

[α]<sub>D</sub><sup>25</sup> +6.2° (c = 2.70, CHCl<sub>3</sub>)

<sup>1</sup>H NMR (400 MHz, CDCl<sub>3</sub>): δ 7.60 - 7.57 (m, 2H), 7.36 - 7.34 (m, 3H), 7.24 - 7.17 (m, 4H), 7.13 - 7.09 (m, 1H), 4.13 (qd, *J* = 7.1, 0.9 Hz, 2H), 3.04 (s, 2H), 1.85 (s, 3H), 1.22 (t, *J* = 7.1 Hz, 3H), 0.453 (s, 3H), 0.448 (s, 3H). <sup>13</sup>C NMR (100 MHz, CDCl<sub>3</sub>): δ 210.98, 173.04, 140.47, 139.23, 135.77, 130.99, 130.19, 129.91, 129.75, 128.09, 100.69, 92.45, 62.61, 41.70, 20.12, 16.09, 0.22, 0.00.

36% ee, HPLC, AS-H , Hexane:<sup>t</sup>PrOH = 99:1, 0.6 mL/min, 13.0 min (major), 16.3 min (minor).

HRMS (ESI): *m/z* calculated for C<sub>22</sub>H<sub>26</sub>O<sub>2</sub>SiNa [M+Na]<sup>+</sup>:373.1600, found:373.1605.

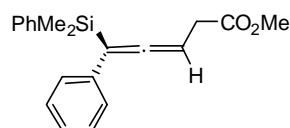

**3ac**<sup>\*</sup>: In an oven dried 15 mL Schlenk tube equipped with a stirring bar, 0.01mmol (1.9 mg, 5 mol%) CuTC, 0.012 mmol (3.6 mg, 6 mol%) ligand L<sub>5</sub> were dissolved in 1 mL of dry <sup>t</sup>AmOH under argon atmosphere. The mixture was stirred for one hour at room temperature to form a light green solution. Then the tube was cooled to 0 °C, and 0.2 mmol **1ac** (1.0 equiv, 37.2 mg), 0.3 mmol (1.5 equiv, 79 mg) Me<sub>2</sub>PhSi-Bpin were added to the tube under argon atmosphere. It was continued to stir for 48 hours at 0 °C. Then the final deep green solution was concentrated under vacuum to afford the crude product which was isolated through flash column chromatography (Eluent: PE/Et<sub>2</sub>O = 97:3) to furnish the related product **3ac**<sup>\*</sup> (52.3 mg, 81%) as colorless oil.

$[\alpha]_D^{25} +61.5^\circ$  ( $c = 2.14$ ,  $\text{CHCl}_3$ ).

$^1\text{H}$  NMR (400 MHz,  $\text{CDCl}_3$ ):  $\delta$  7.60 - 7.57 (m, 2H), 7.38 - 7.35 (m, 3H), 7.22 - 7.21 (m, 4H), 7.17 - 7.12 (m, 1H), 5.37 (t,  $J = 7.4$  Hz, 1H), 3.70 (s, 3H), 3.14 (dd,  $J = 16.2$ , 7.2 Hz, 1H), 3.09 (dd,  $J = 16.2$ , 7.6 Hz, 1H), 0.473 (s, 3H), 0.468 (s, 3H).  $^{13}\text{C}$  NMR (100 MHz,  $\text{CDCl}_3$ ):  $\delta$  211.56, 173.77, 139.99, 138.37, 135.81, 131.13, 130.29, 129.86, 129.80, 128.35, 101.83, 82.88, 53.81, 35.85, 0.06, 0.00.

94% ee, HPLC, IC, Hexane: $i$ PrOH = 300:1, 0.6 mL/min, 15.1 min (major), 13.5 min (minor).

HRMS (ESI):  $m/z$  calculated for  $\text{C}_{20}\text{H}_{22}\text{O}_2\text{SiNa}$   $[\text{M}+\text{Na}]^+$ : 345.1287, found: 345.1289.

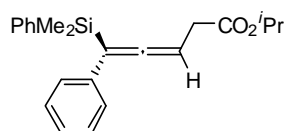

**3ad**<sup>\*</sup>: In an oven dried 15 mL Schlenk tube equipped with a stirring bar, 0.01 mmol (1.9 mg, 5 mol%) CuTC, 0.012 mmol (3.6 mg, 6 mol%) ligand **L**<sub>5</sub> were added in 1 mL of dry  $i$ AmOH under argon atmosphere. The mixture was stirred for one hour at room temperature to form a light green solution. Then the tube was cooled to  $-5^\circ\text{C}$ , and 0.2 mmol **1ad** (1.0 equiv, 42.9 mg), 0.3 mmol (1.5 equiv, 79 mg)  $\text{Me}_2\text{PhSi-Bpin}$  were added to the tube under argon atmosphere. It was continued to stir for 72 hours at  $-5^\circ\text{C}$ . Then the final deep green solution was concentrated under vacuum to afford the crude product which was isolated through flash column chromatography (Eluent: PE/ $\text{Et}_2\text{O}$  = 97:3) to furnish the related product **3ad**<sup>\*</sup> (52 mg, 74%) as colorless oil.

$[\alpha]_D^{25} +43.6^\circ$  ( $c = 2.07$ ,  $\text{CHCl}_3$ ).

$^1\text{H}$  NMR (400 MHz,  $\text{CDCl}_3$ ):  $\delta$  7.60 - 7.57 (m, 2H), 7.36 - 7.34 (m, 3H), 7.24 - 7.18 (m, 4H), 7.14 - 7.10 (m, 1H), 5.37 (t,  $J = 7.4$  Hz, 1H), 5.03 (sep,  $J = 6.3$  Hz, 1H), 3.16 - 3.00 (m, 2H), 1.24 - 1.22 (m, 7H), 0.47 (s, 3H), 0.46 (s, 3H).  $^{13}\text{C}$  NMR (100 MHz,  $\text{CDCl}_3$ ):  $\delta$  211.54, 172.73, 139.94, 138.33, 135.69, 131.00, 130.14, 129.76, 129.69, 128.19, 101.47, 83.07, 70.02, 36.41, 23.62, 0.00, -0.05.

91% ee, HPLC, OD-H, Hexane: $i$ PrOH = 250:1, 0.7 mL/min, 26.6 min (major), 25.8 min (minor).

HRMS (ESI):  $m/z$  calculated for  $\text{C}_{22}\text{H}_{26}\text{O}_2\text{SiNa}$   $[\text{M}+\text{Na}]^+$ : 373.1600, found: 373.1607.

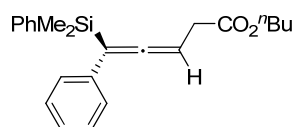

**3ae\***: In an oven dried 15 mL Schlenk tube equipped with a stirring bar, 0.01mmol (1.9 mg, 5 mol%) CuTC, 0.012 mmol (3.6 mg, 6 mol%) ligand L<sub>5</sub> were dissolved in 1 mL of dry <sup>t</sup>AmOH under argon atmosphere. The mixture was stirred for one hour at room temperature to form a light green solution. Then the tube was cooled to 0 °C, and 0.2 mmol **1ae** (1.0 equiv, 45.7 mg), 0.3 mmol (1.5 equiv, 79 mg) Me<sub>2</sub>PhSi-Bpin were added to the tube under argon atmosphere. It was continued to stir for 48 hours at 0 °C. Then the final deep green solution was concentrated under vacuum to afford the crude product which was isolated through flash column chromatography (Eluent: PE/Et<sub>2</sub>O = 97:3) to furnish the related product **3ae\*** (54.7 mg, 75%) as colorless oil.  $[\alpha]_D^{25} +24.0^\circ$  (c = 2.12, CHCl<sub>3</sub>).

<sup>1</sup>H NMR (400 MHz, CDCl<sub>3</sub>): δ 7.60 - 7.55 (m, 2H), 7.36 - 7.32 (m, 3H), 7.23 - 7.17 (m, 4H), 7.14 - 7.10 (m, 1H), 5.36 (t, *J* = 7.4 Hz, 1H), 4.10 (t, *J* = 6.7 Hz, 2H), 3.13 (dd, *J* = 16.2, 7.2 Hz, 1H), 3.07 (dd, *J* = 16.2, 7.6 Hz, 1H), 1.65 - 1.55 (m, 2H), 1.37 (dq, *J* = 14.6, 7.3 Hz, 2H), 0.91 (t, *J* = 7.4 Hz, 3H), 0.463 (s, 3H), 0.457 (s, 3H). <sup>13</sup>C NMR (100 MHz, CDCl<sub>3</sub>): δ 211.50, 173.32, 139.92, 138.31, 135.70, 131.02, 130.17, 129.77, 129.70, 128.22, 101.60, 82.98, 66.55, 36.08, 32.45, 20.94, 15.52, 0.00, -0.08. 91% ee, HPLC, IC, Hexane:<sup>i</sup>PrOH = 300:1, 0.6 mL/min, 51.1min (major), 49.6 min (minor).

HRMS (ESI): *m/z* calculated for C<sub>23</sub>H<sub>28</sub>O<sub>2</sub>SiNa [M+Na]<sup>+</sup>:387.1756, found:387.1765.

## 2. References

1. Takeuchi, R.; Tanabe, K.; Tanaka, S. *J. Org. Chem.* **2000**, *65*, 1558-1561.
2. Bates, C.G.; Saejueng, P.; Venkataraman, D. *Org. Lett.* **2004**, *6*, 1441-1444.
3. Tian, P.-P.; Cai, S.-H.; Liang, Q.-J.; Zhou, X.-Y.; Xu, Y.-H.; Loh, T. P. *Org. Lett.* **2015**, *17*, 1636-1639.

### 3. $^1\text{H}$ NMR, $^{13}\text{C}$ NMR and HPLC Spectra of the Enynoates and Products

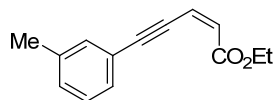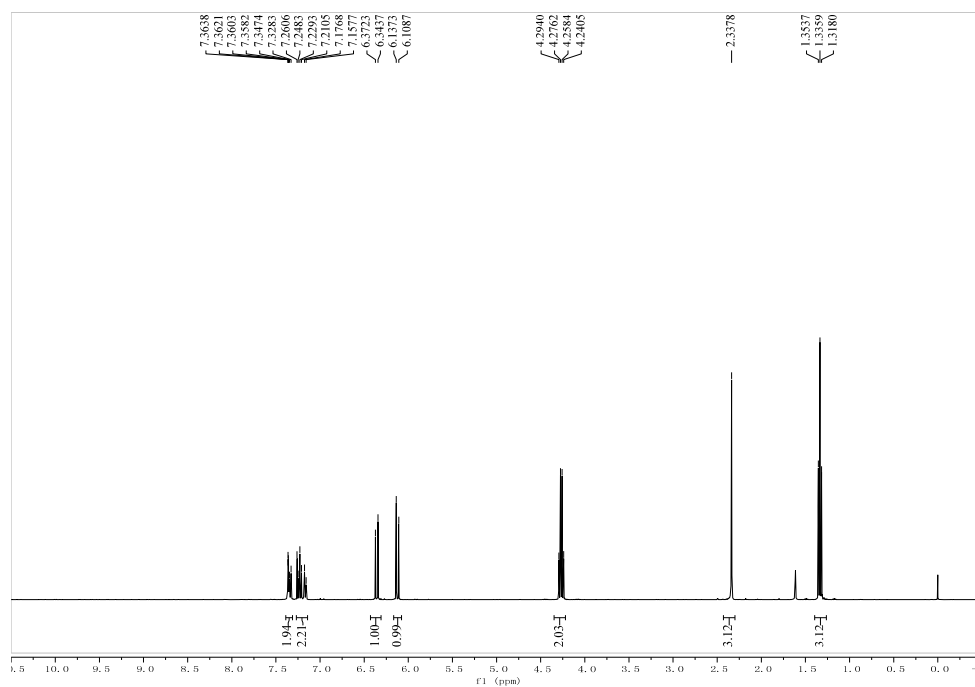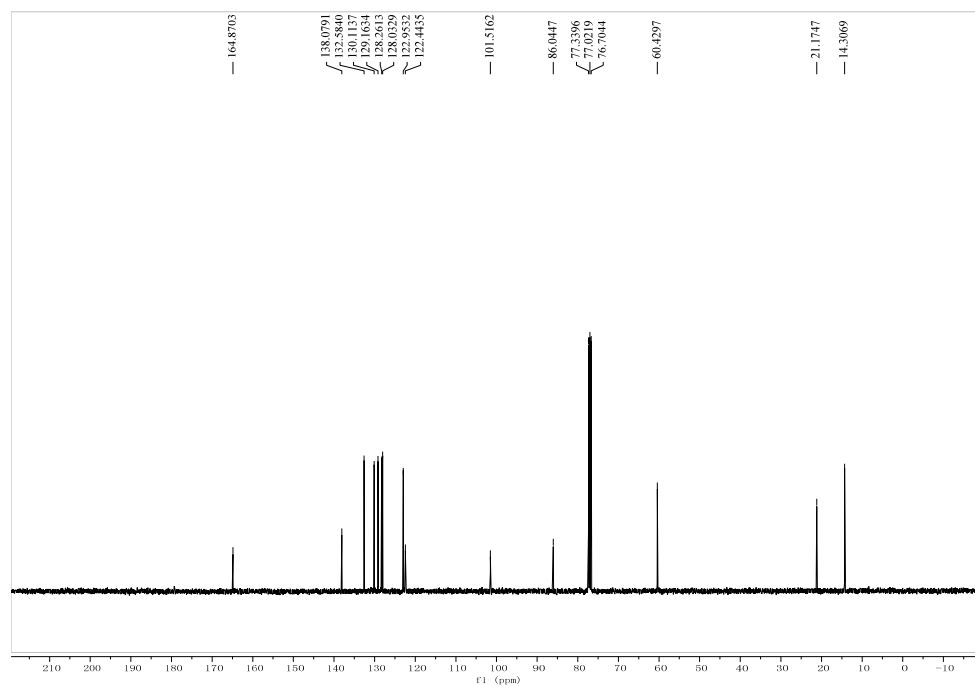



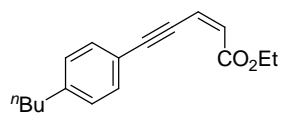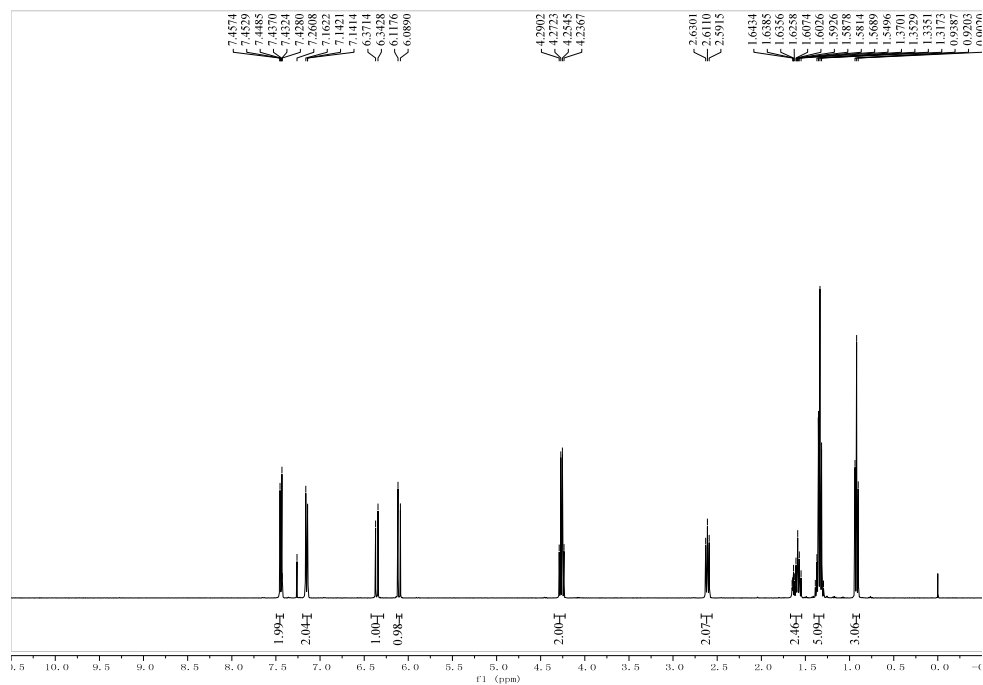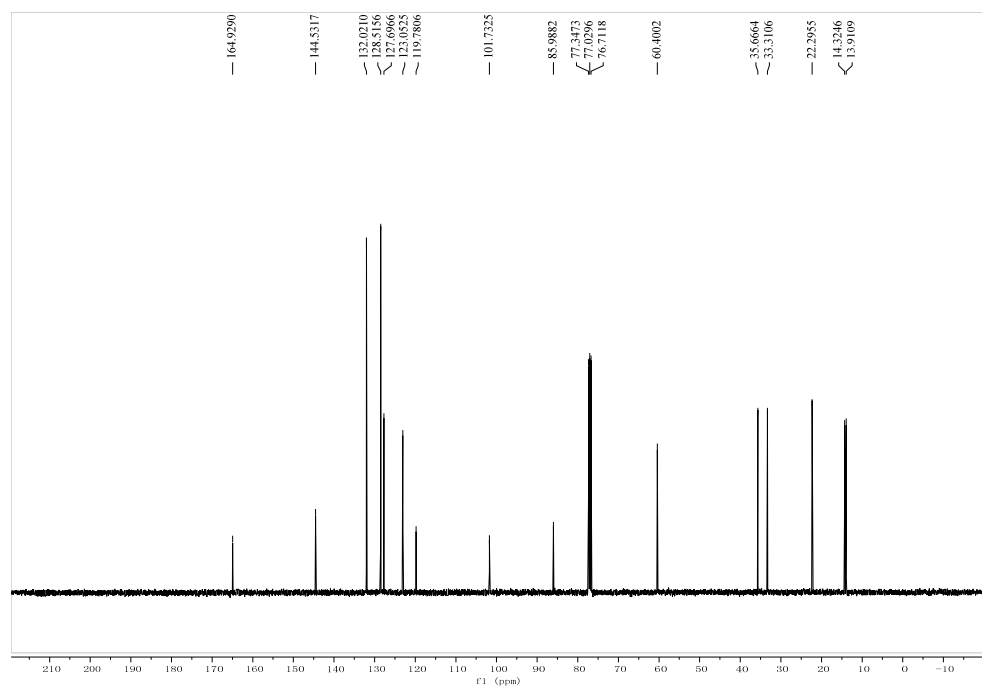

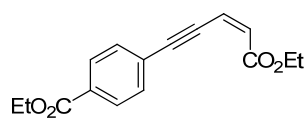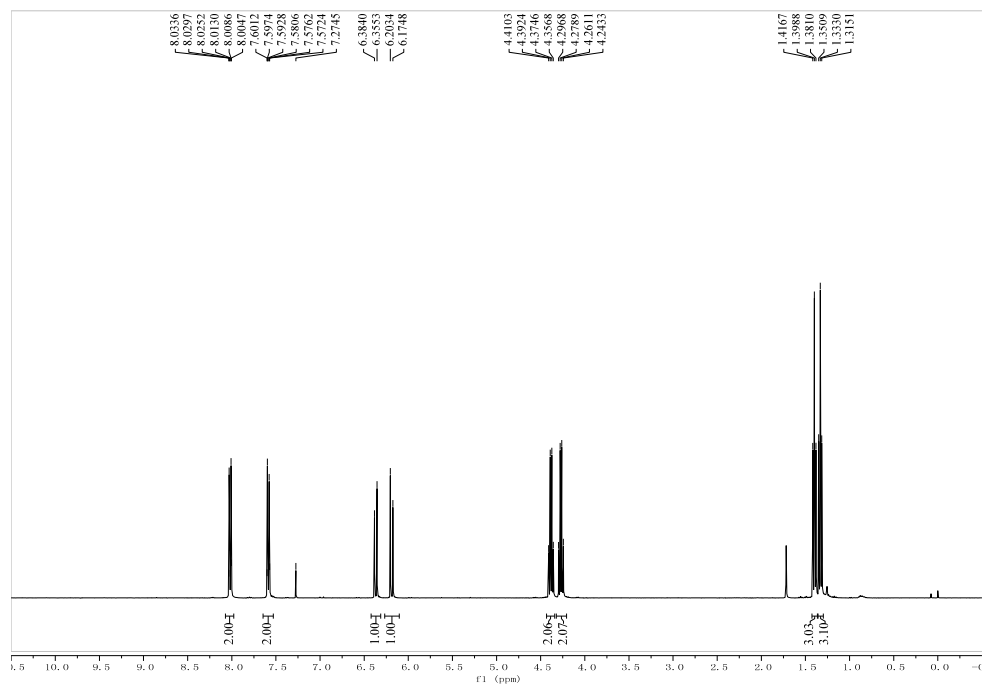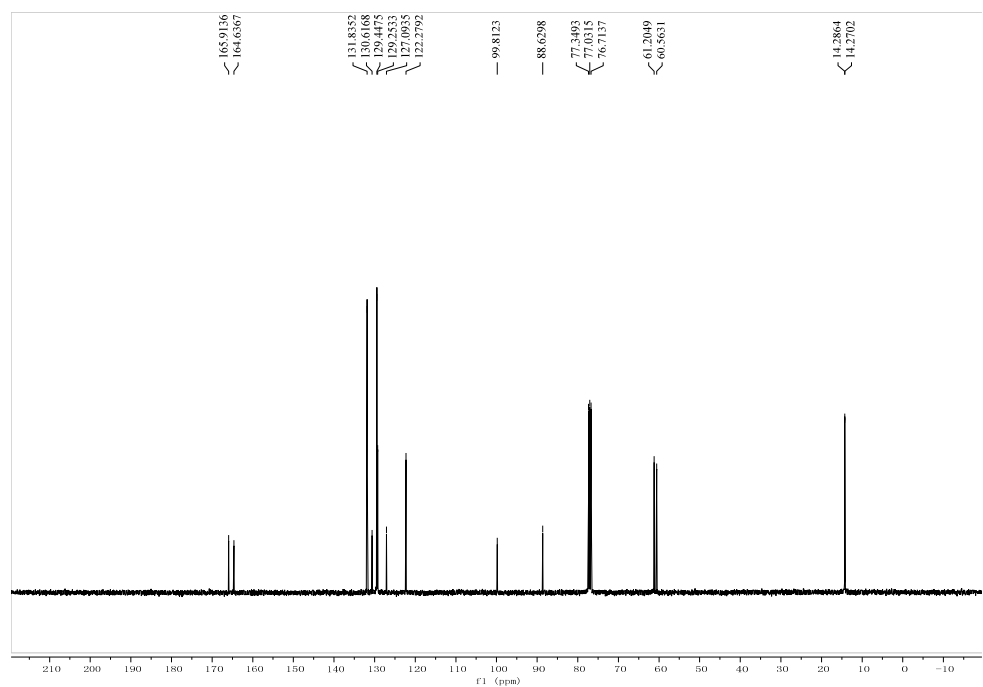

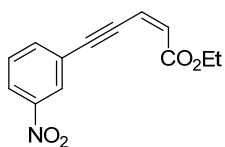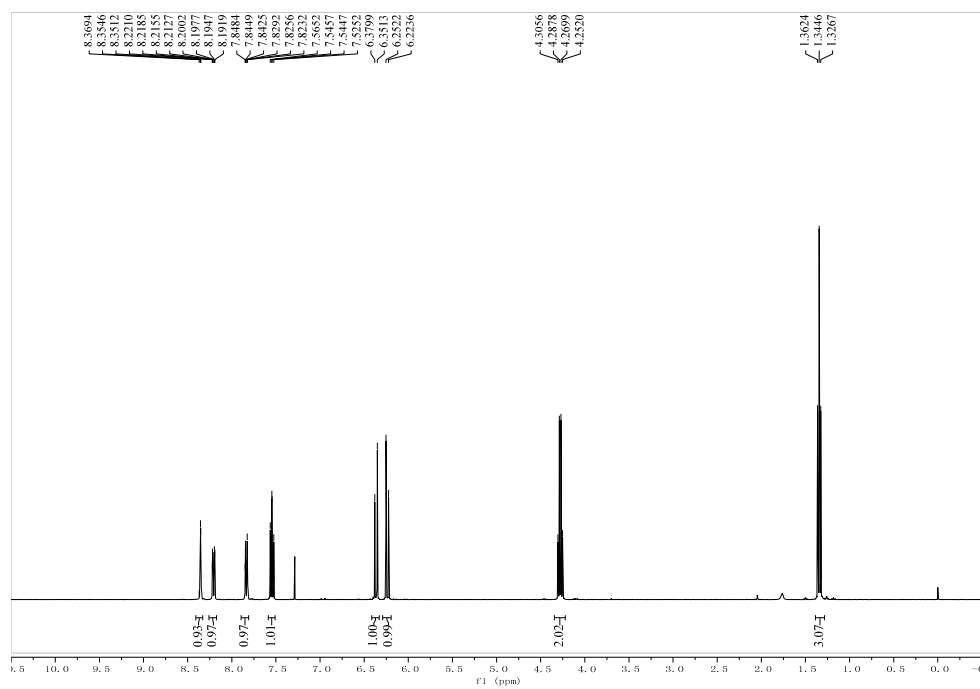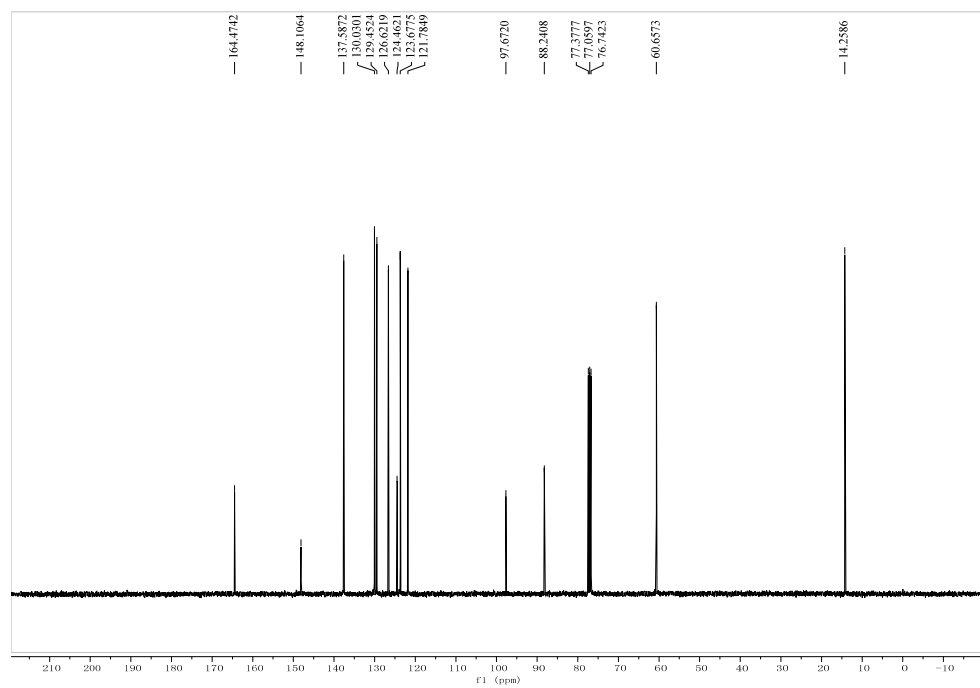

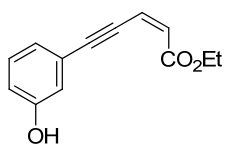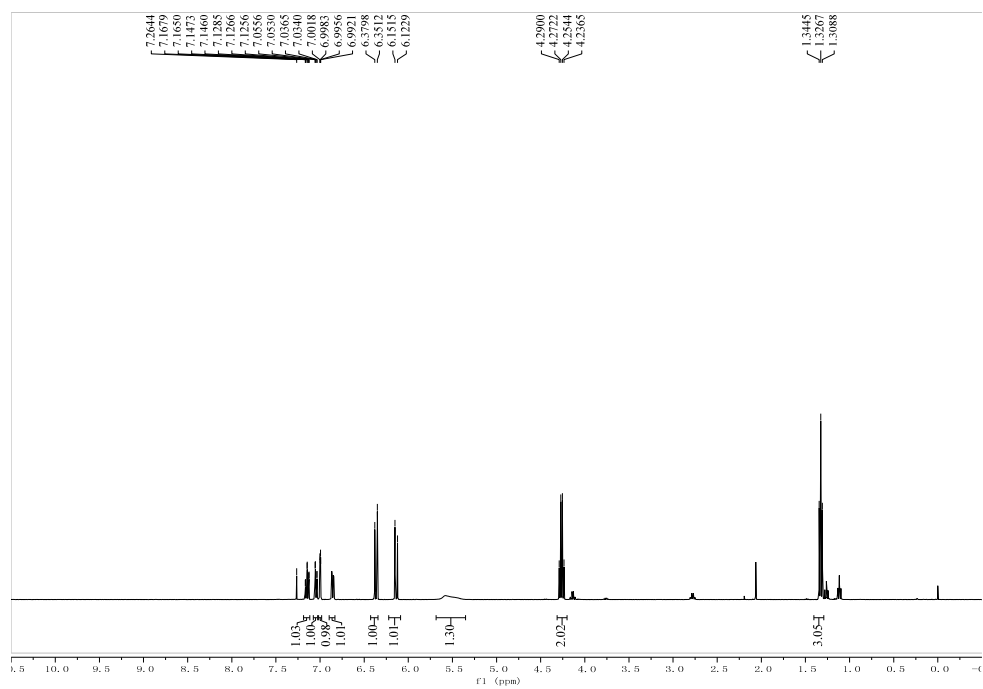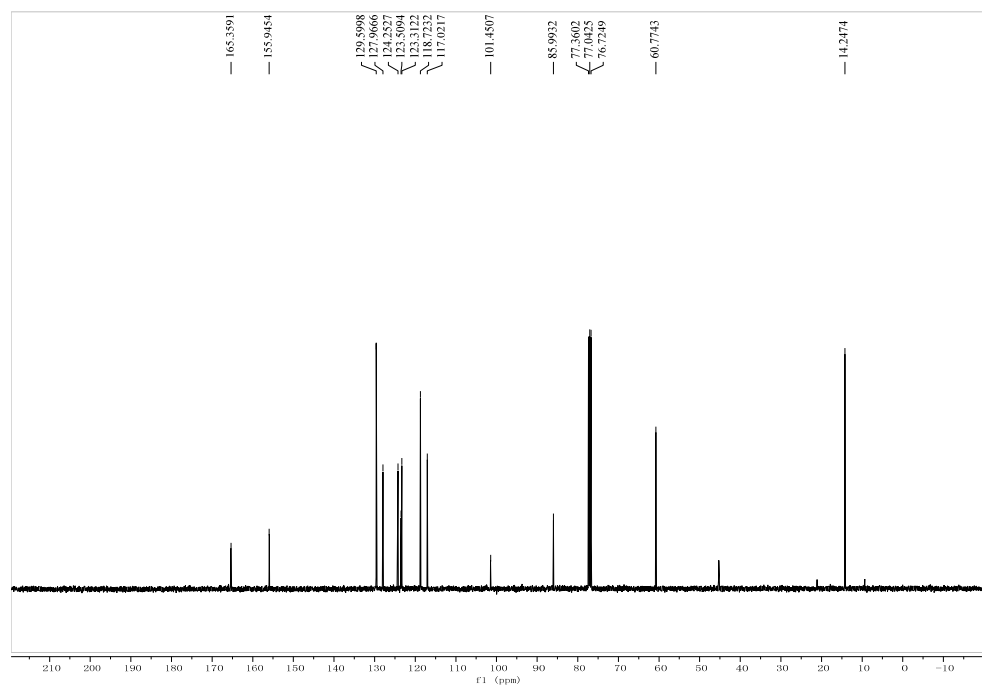

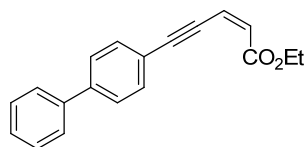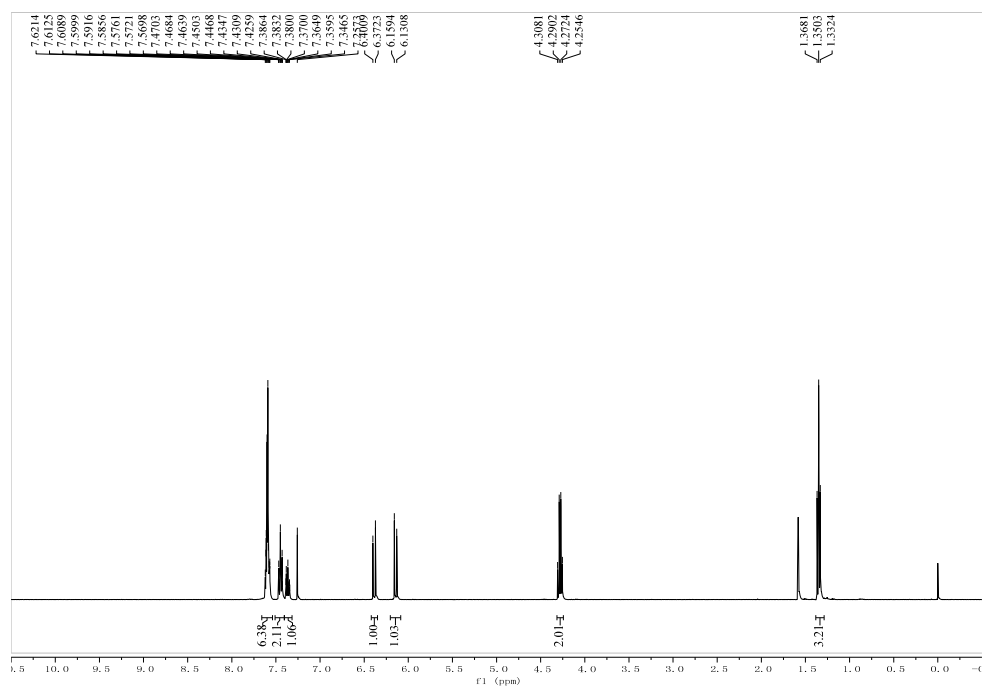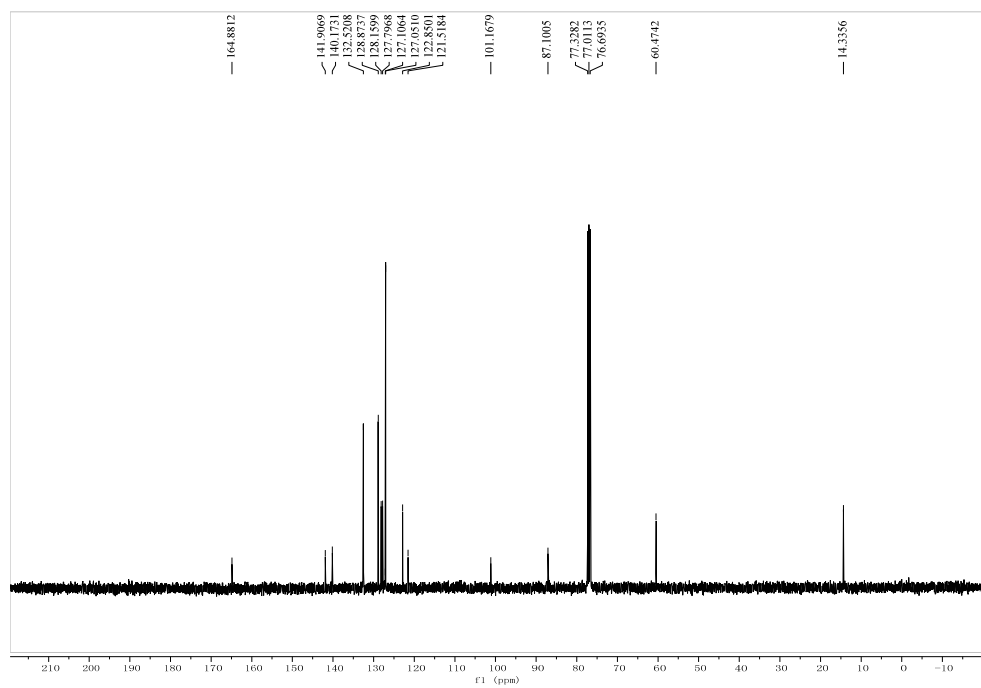

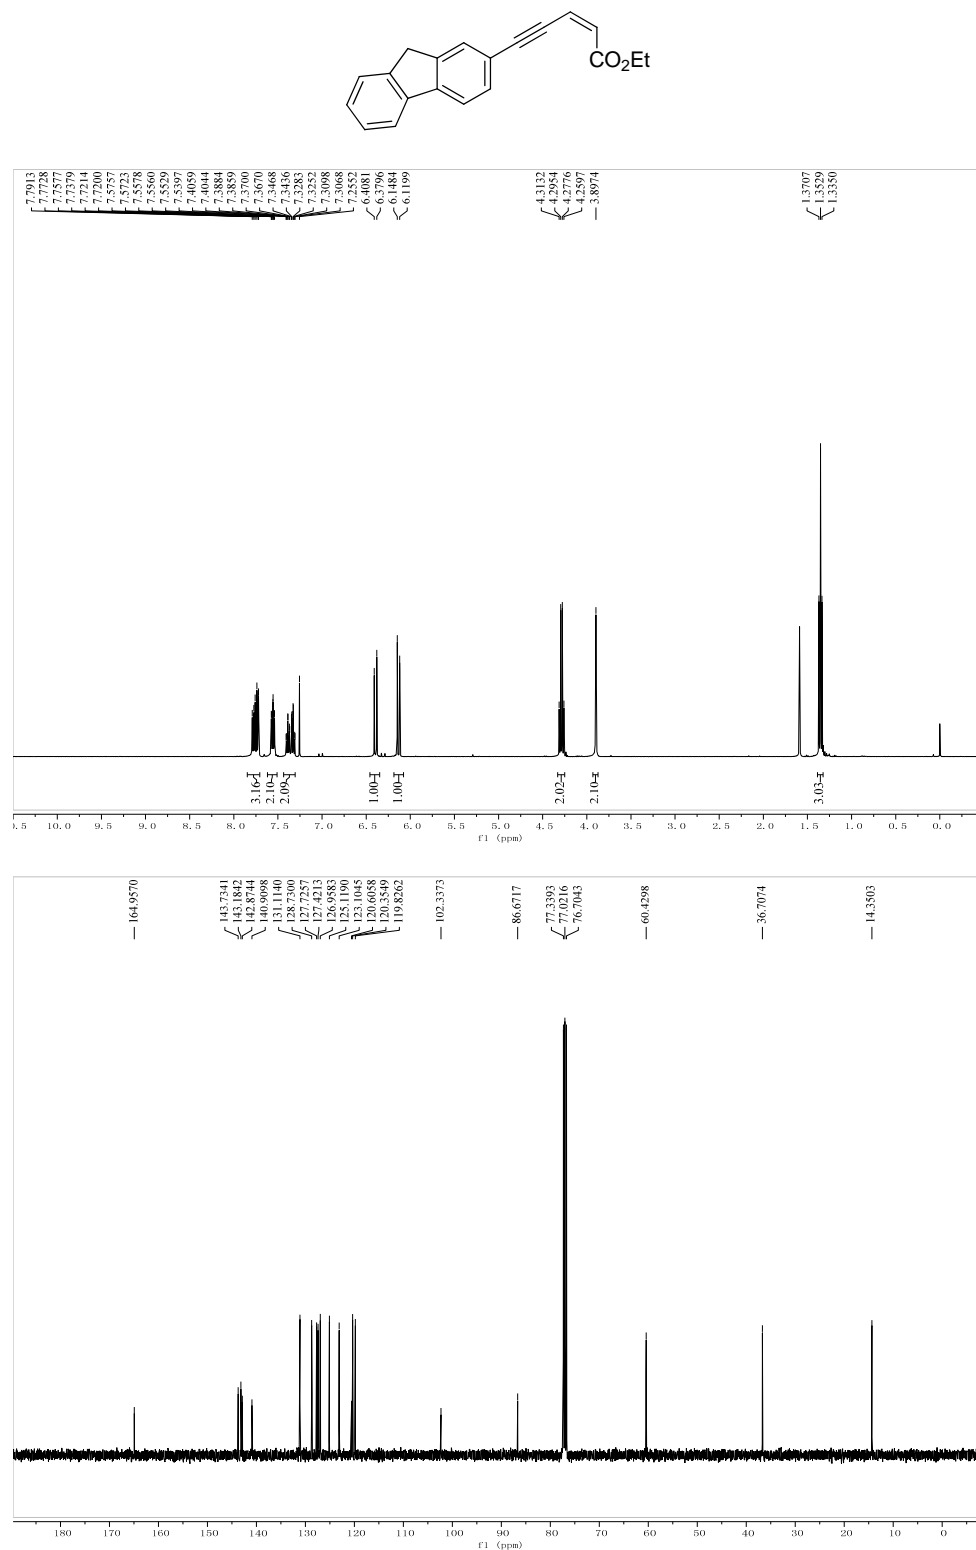

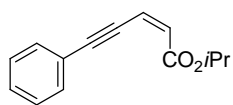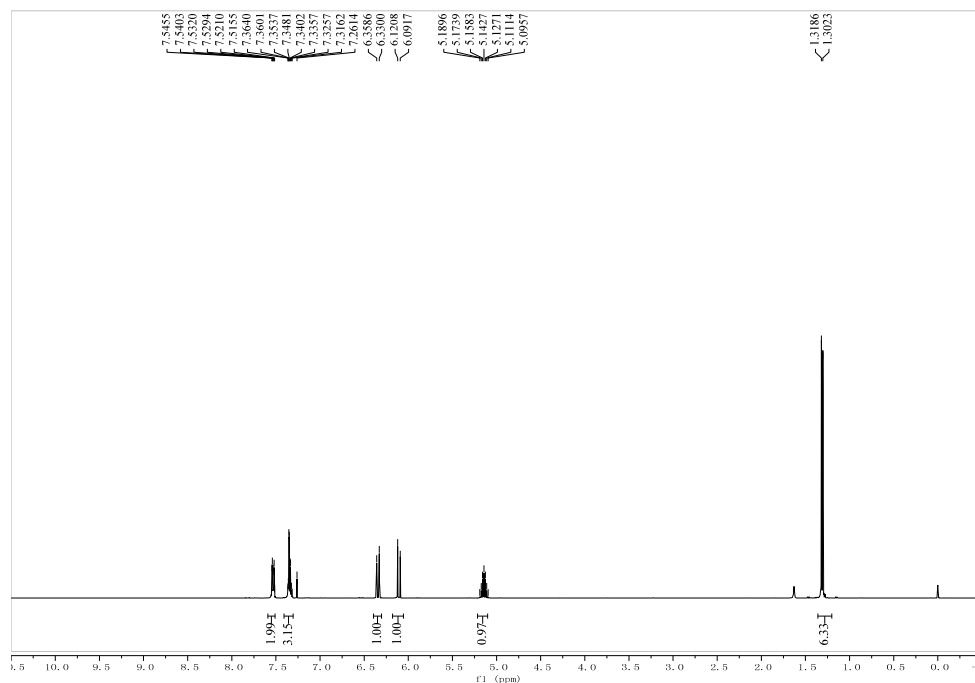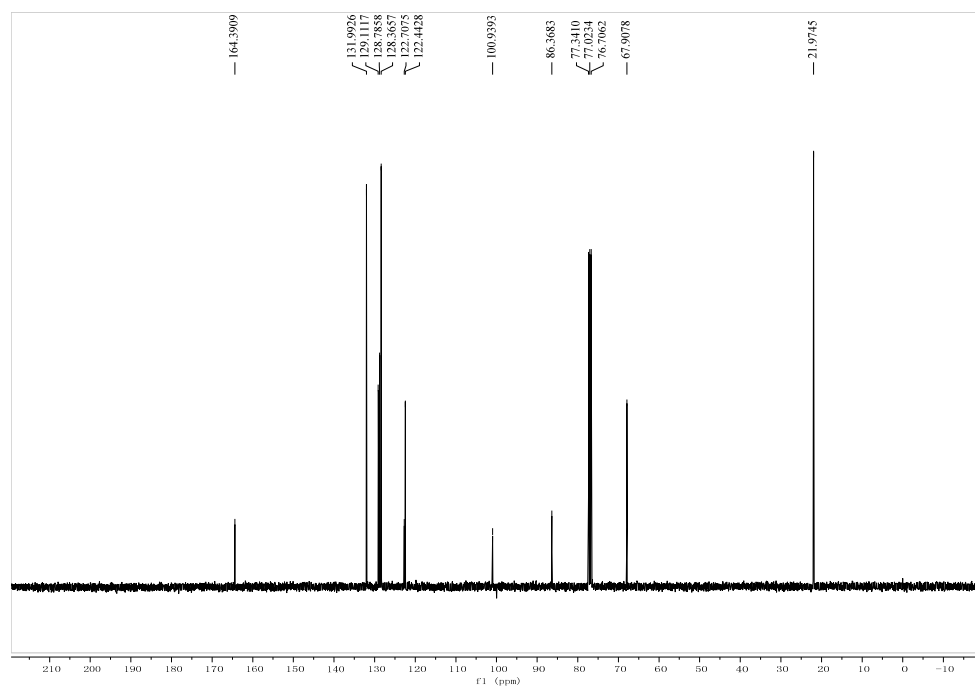

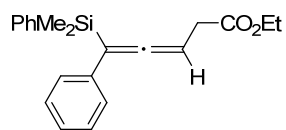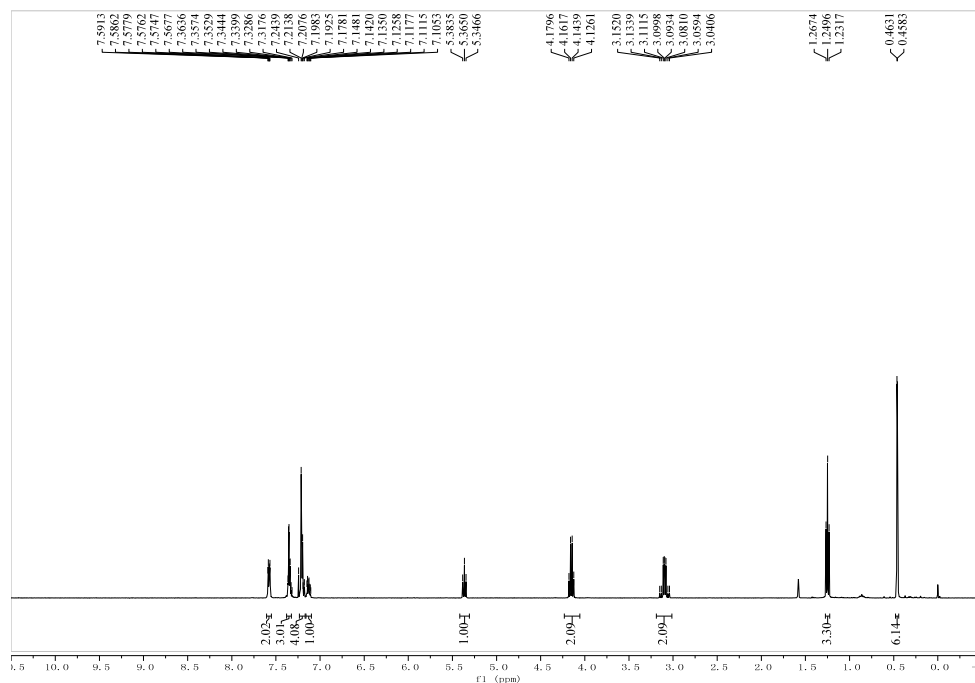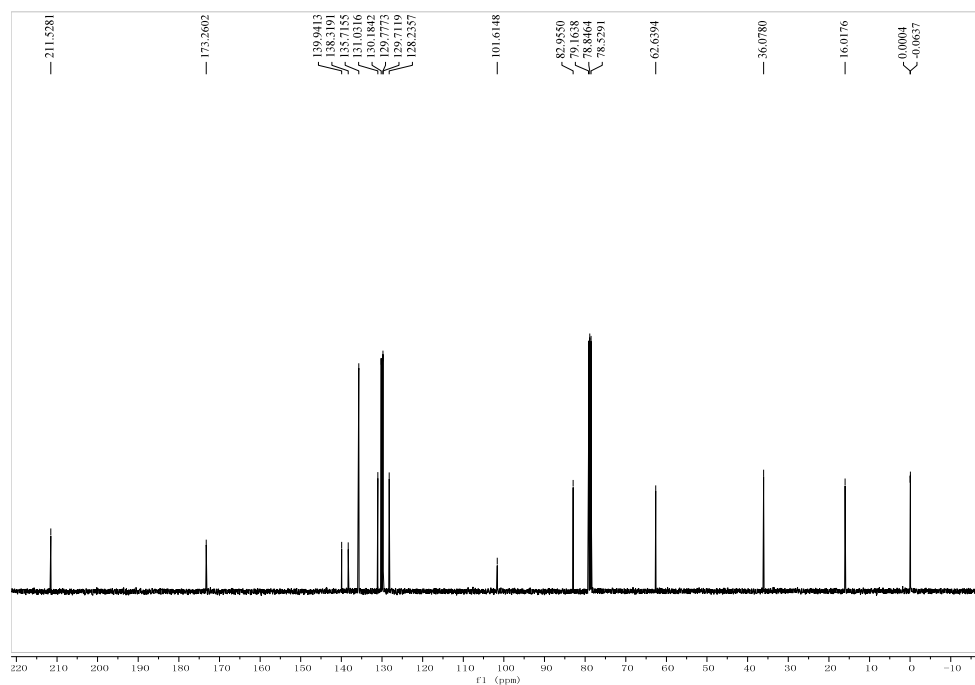



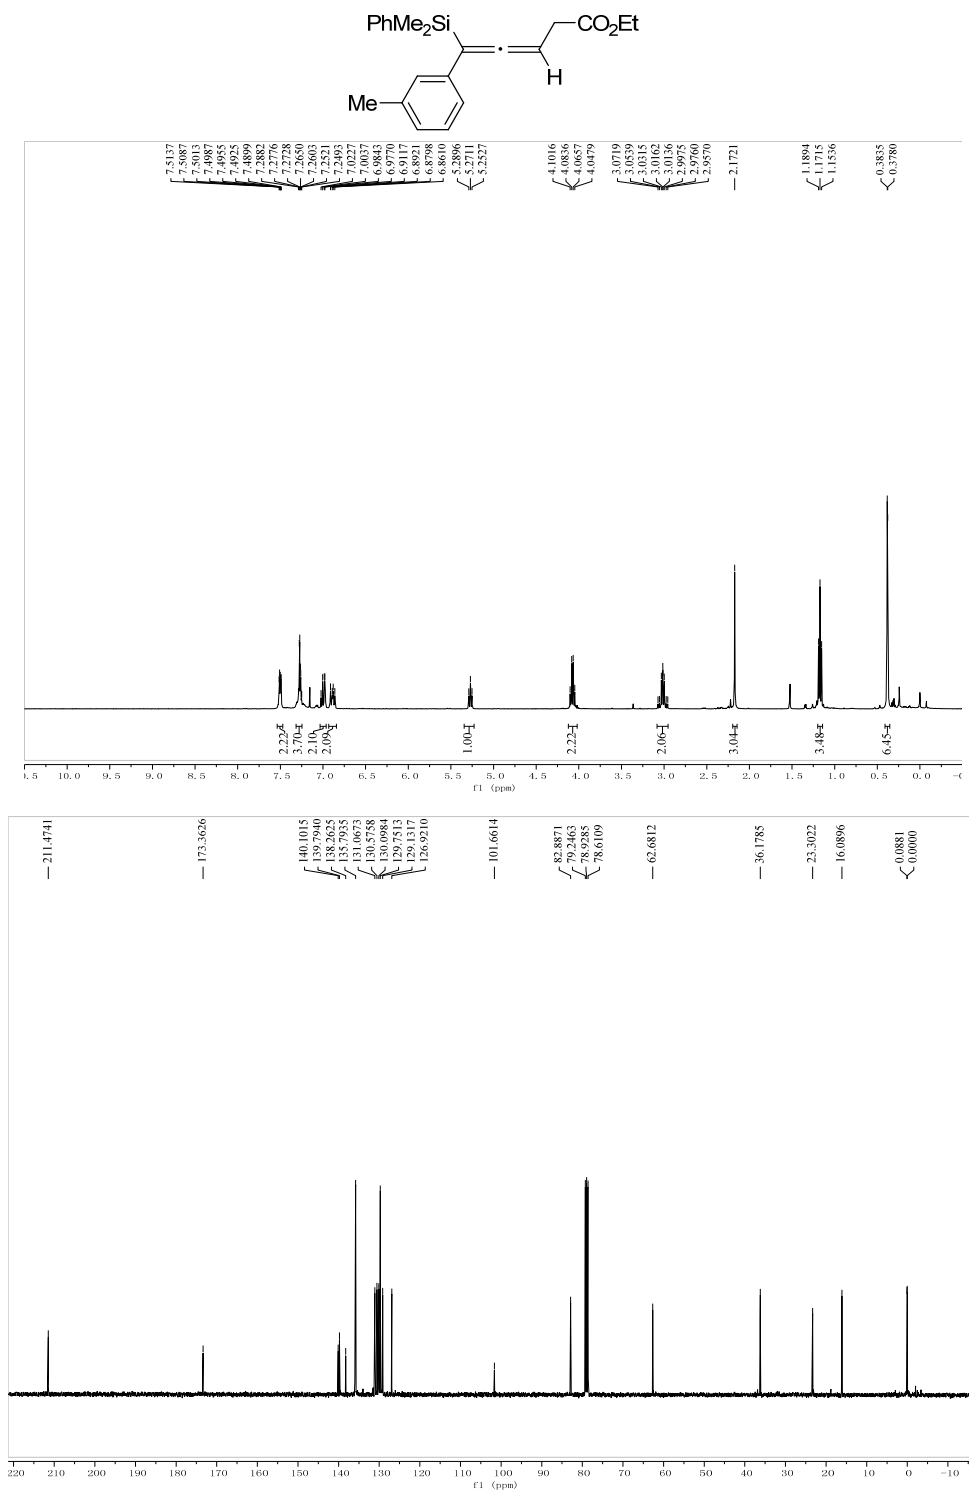

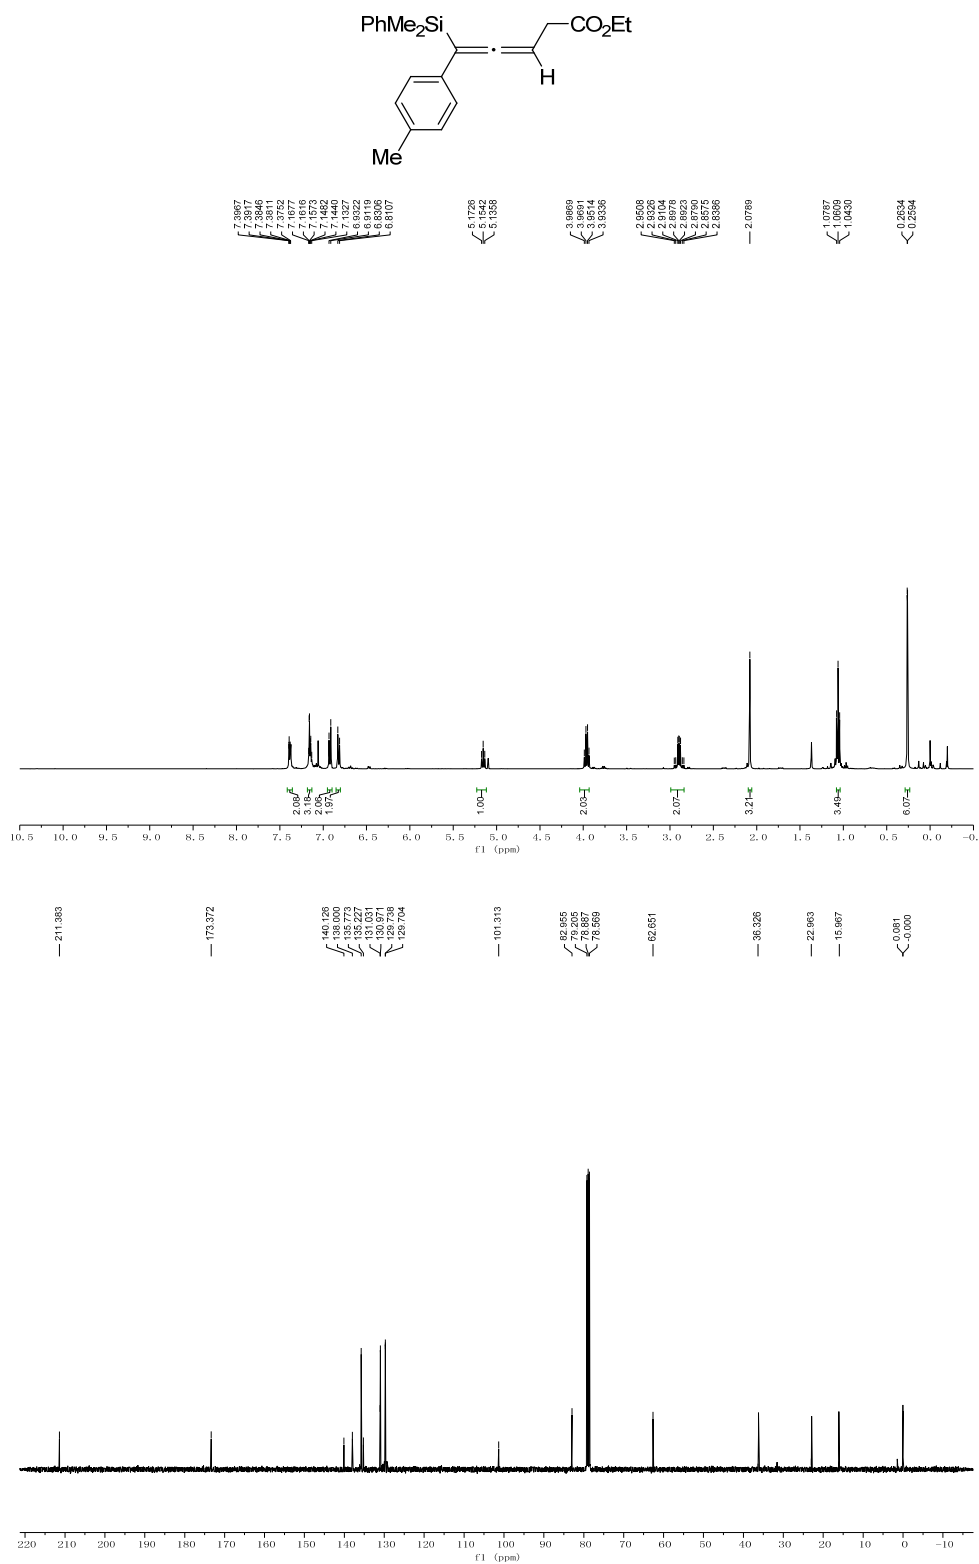

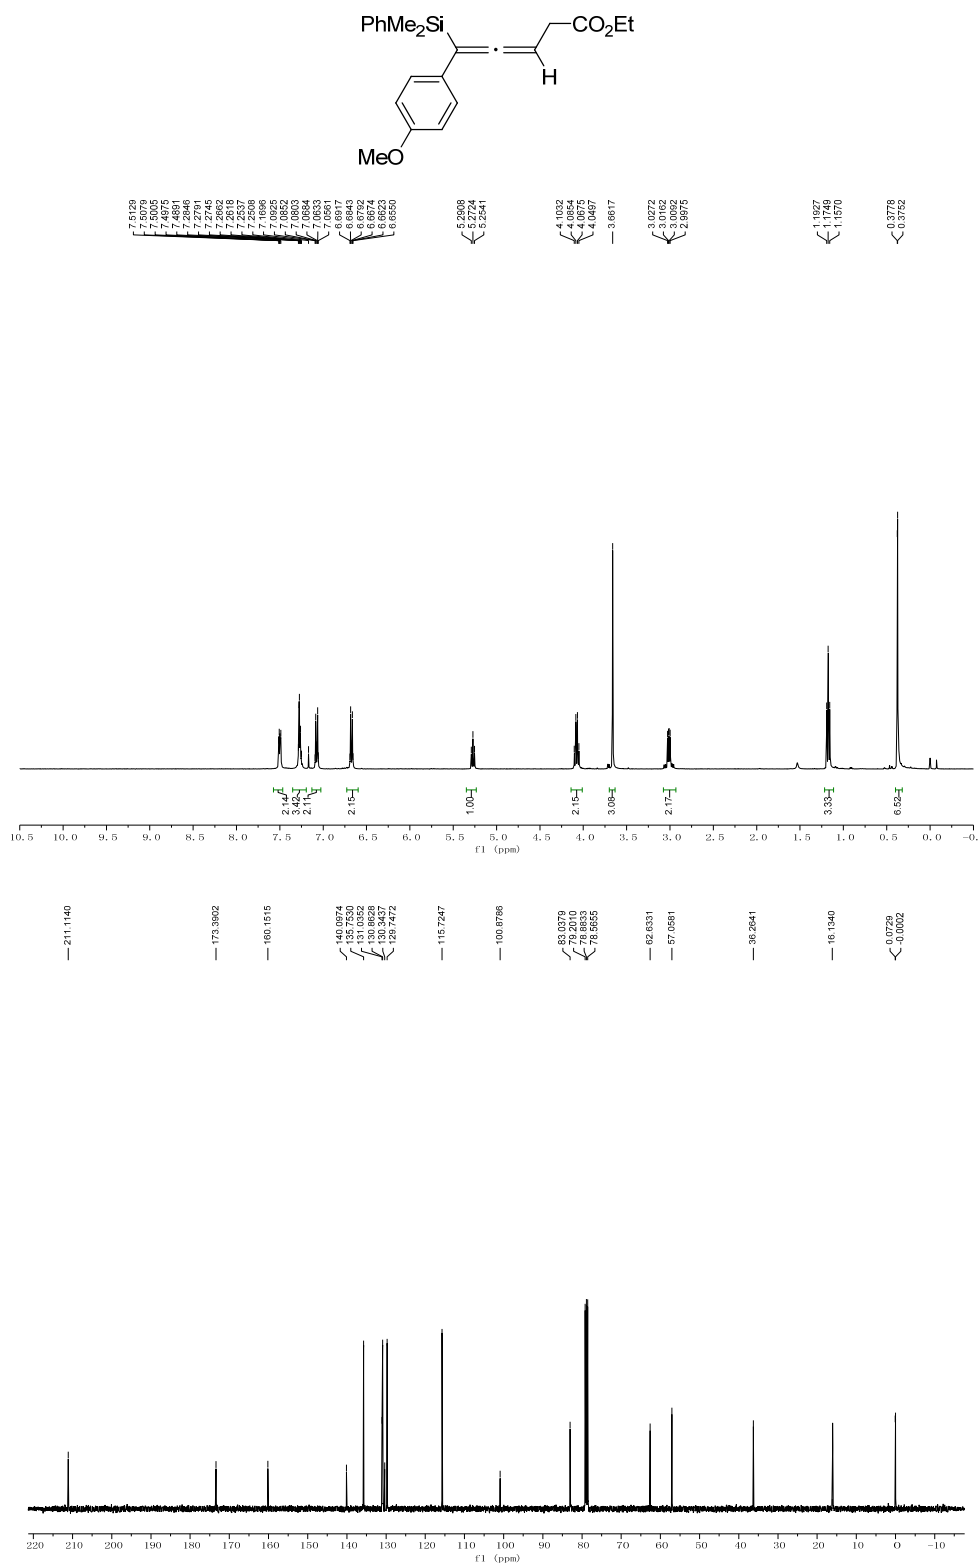

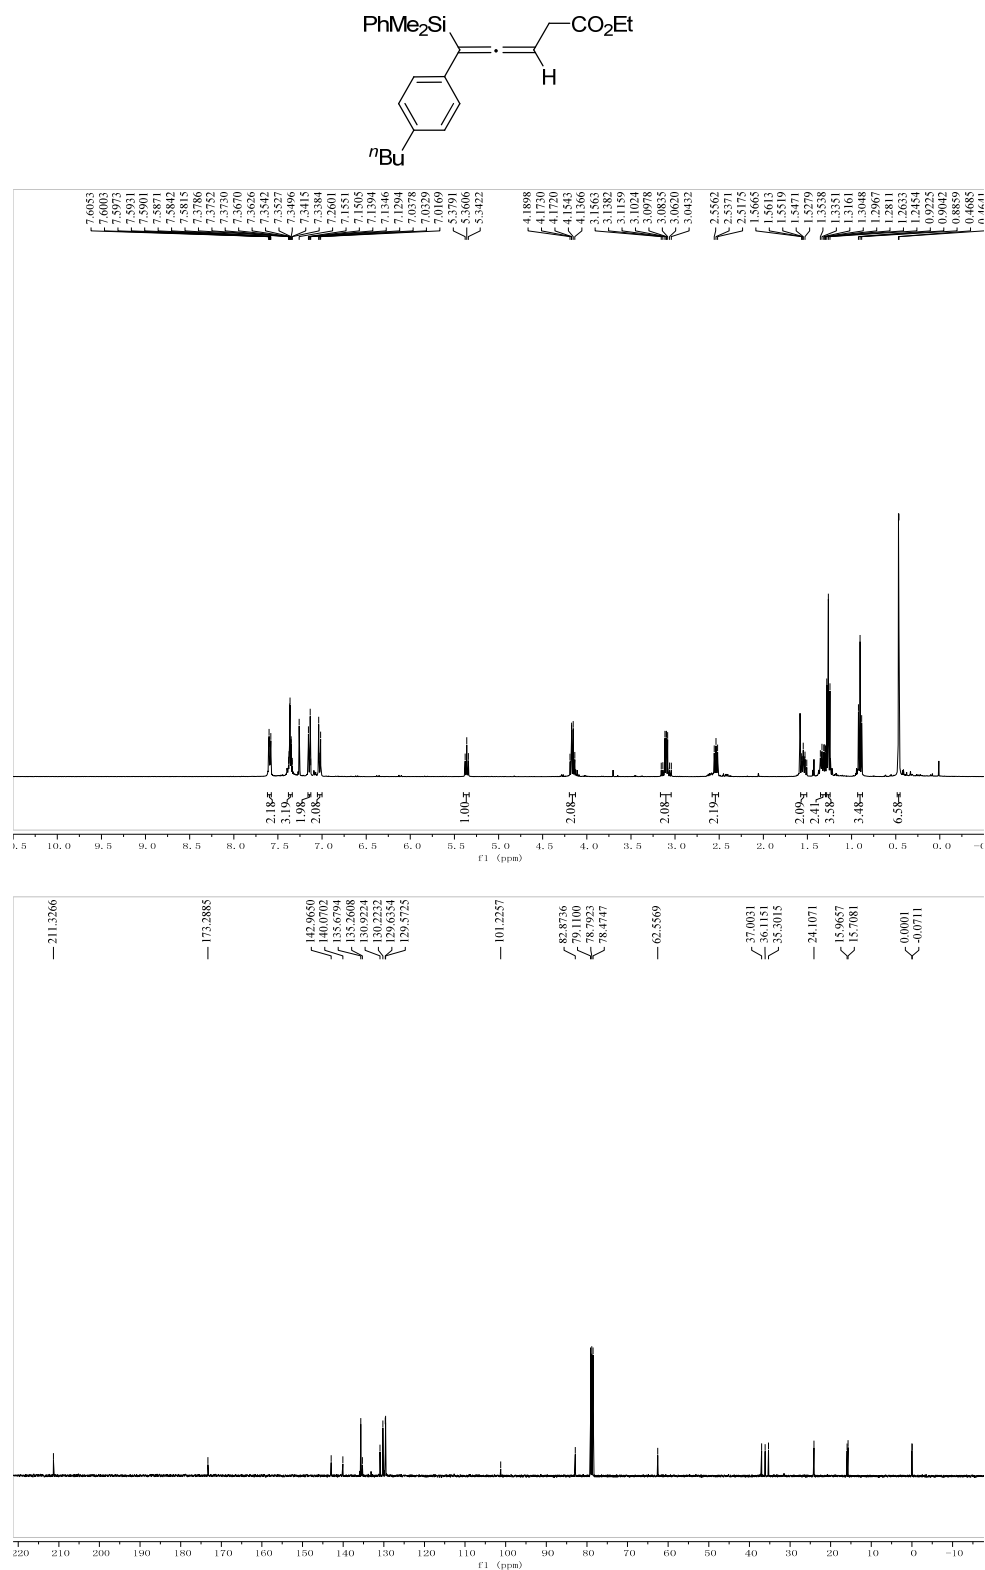

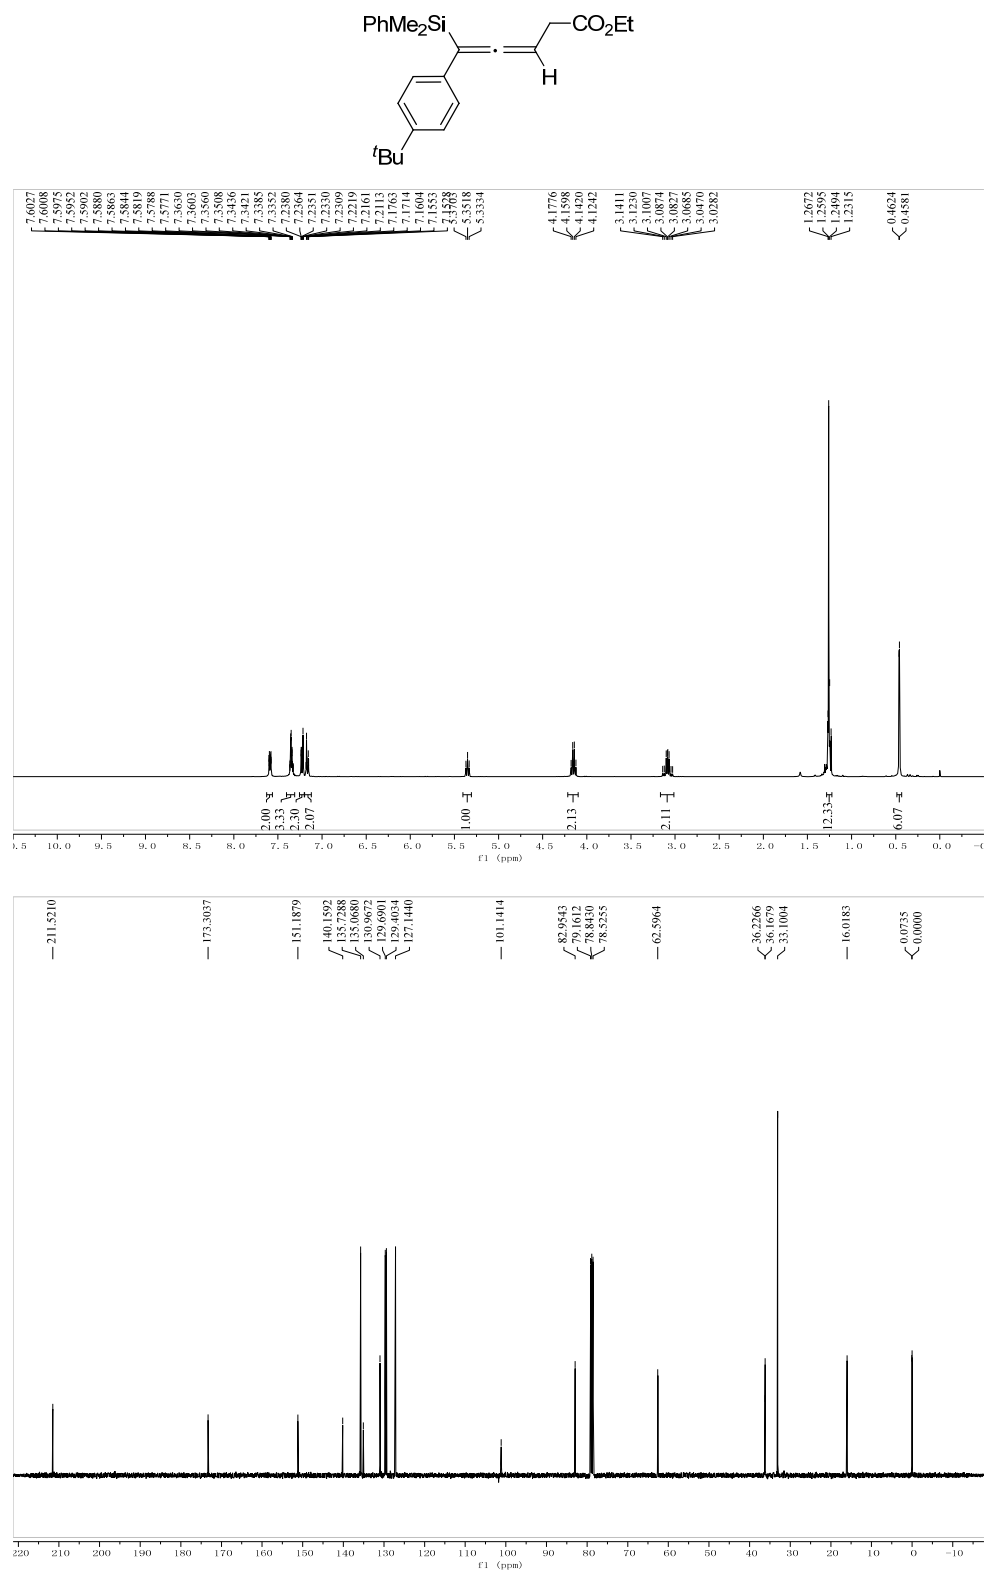

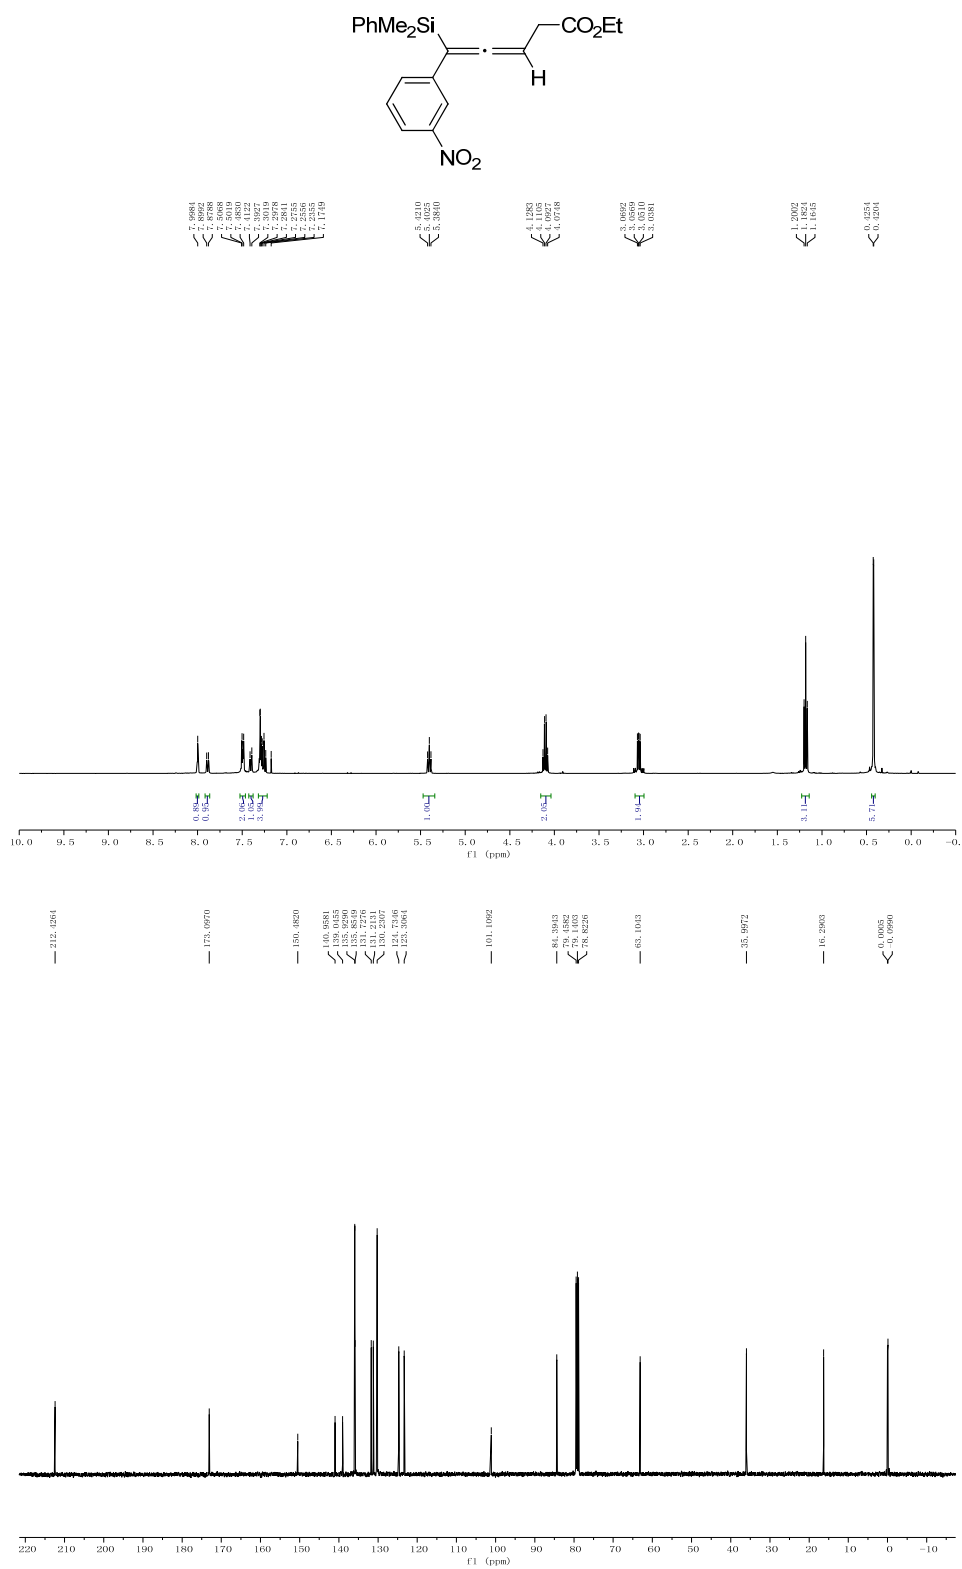

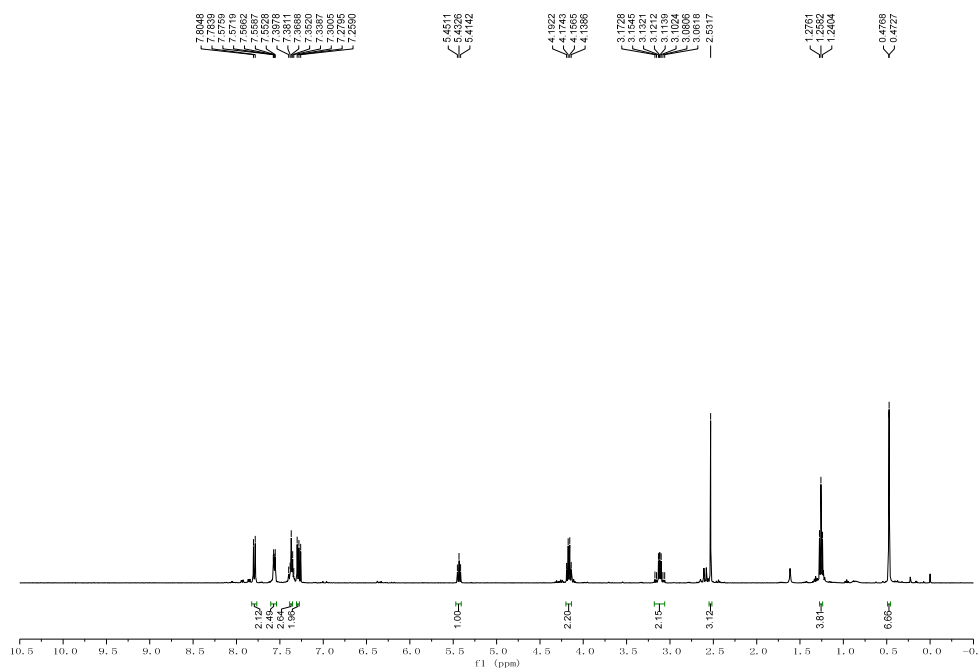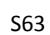

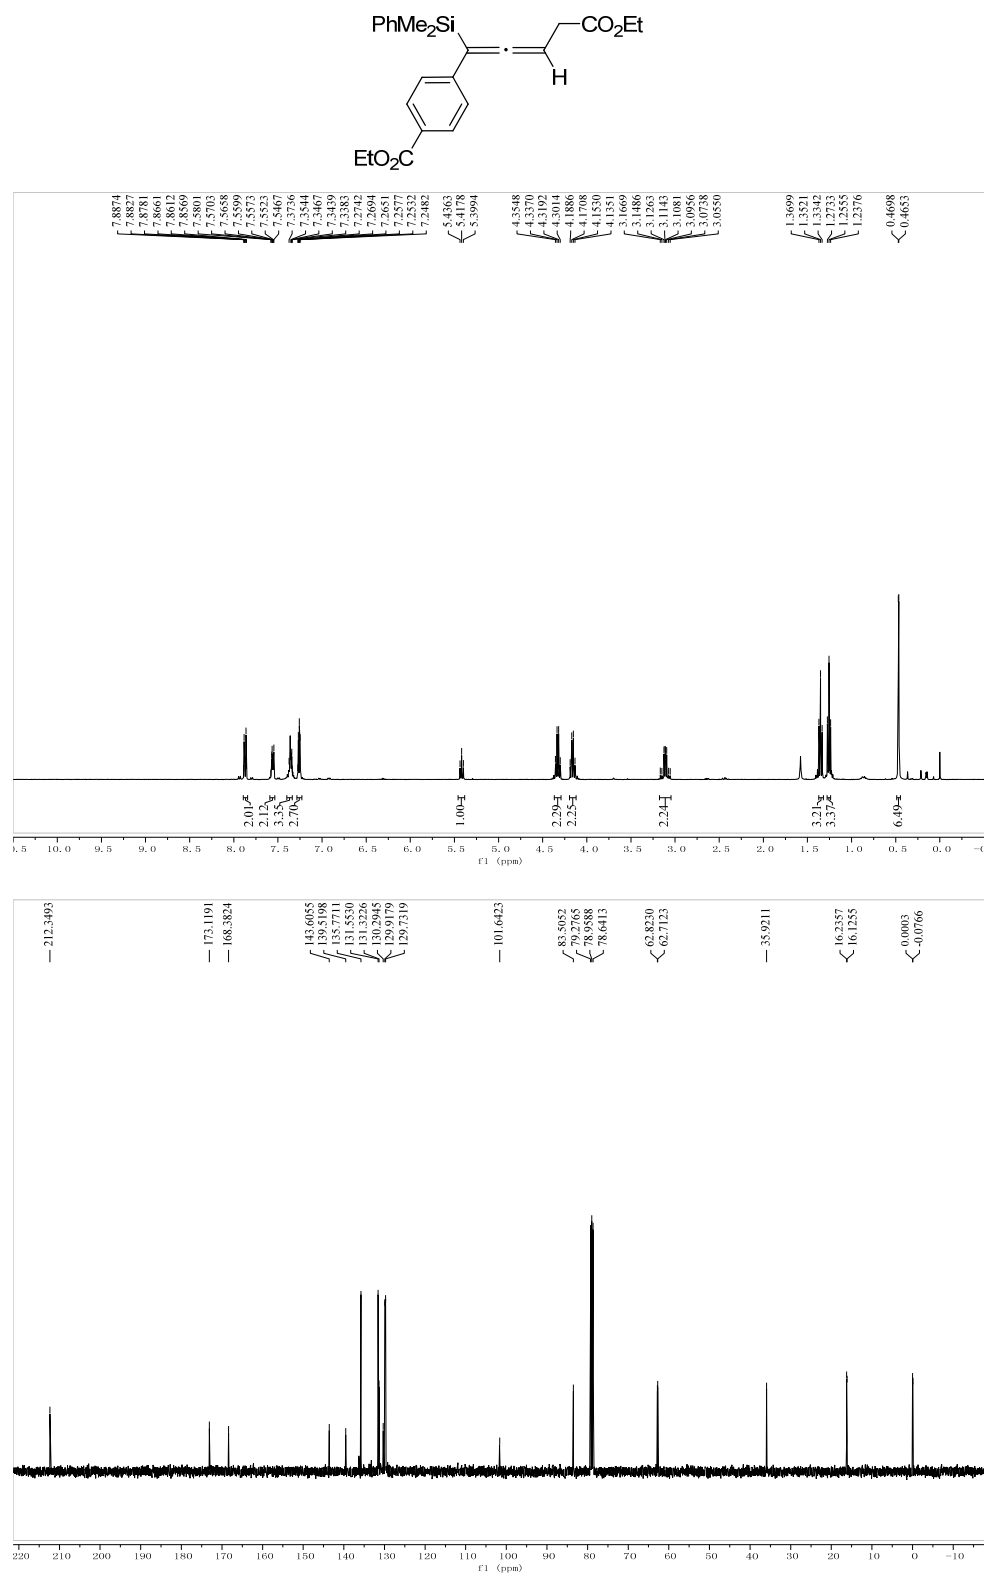



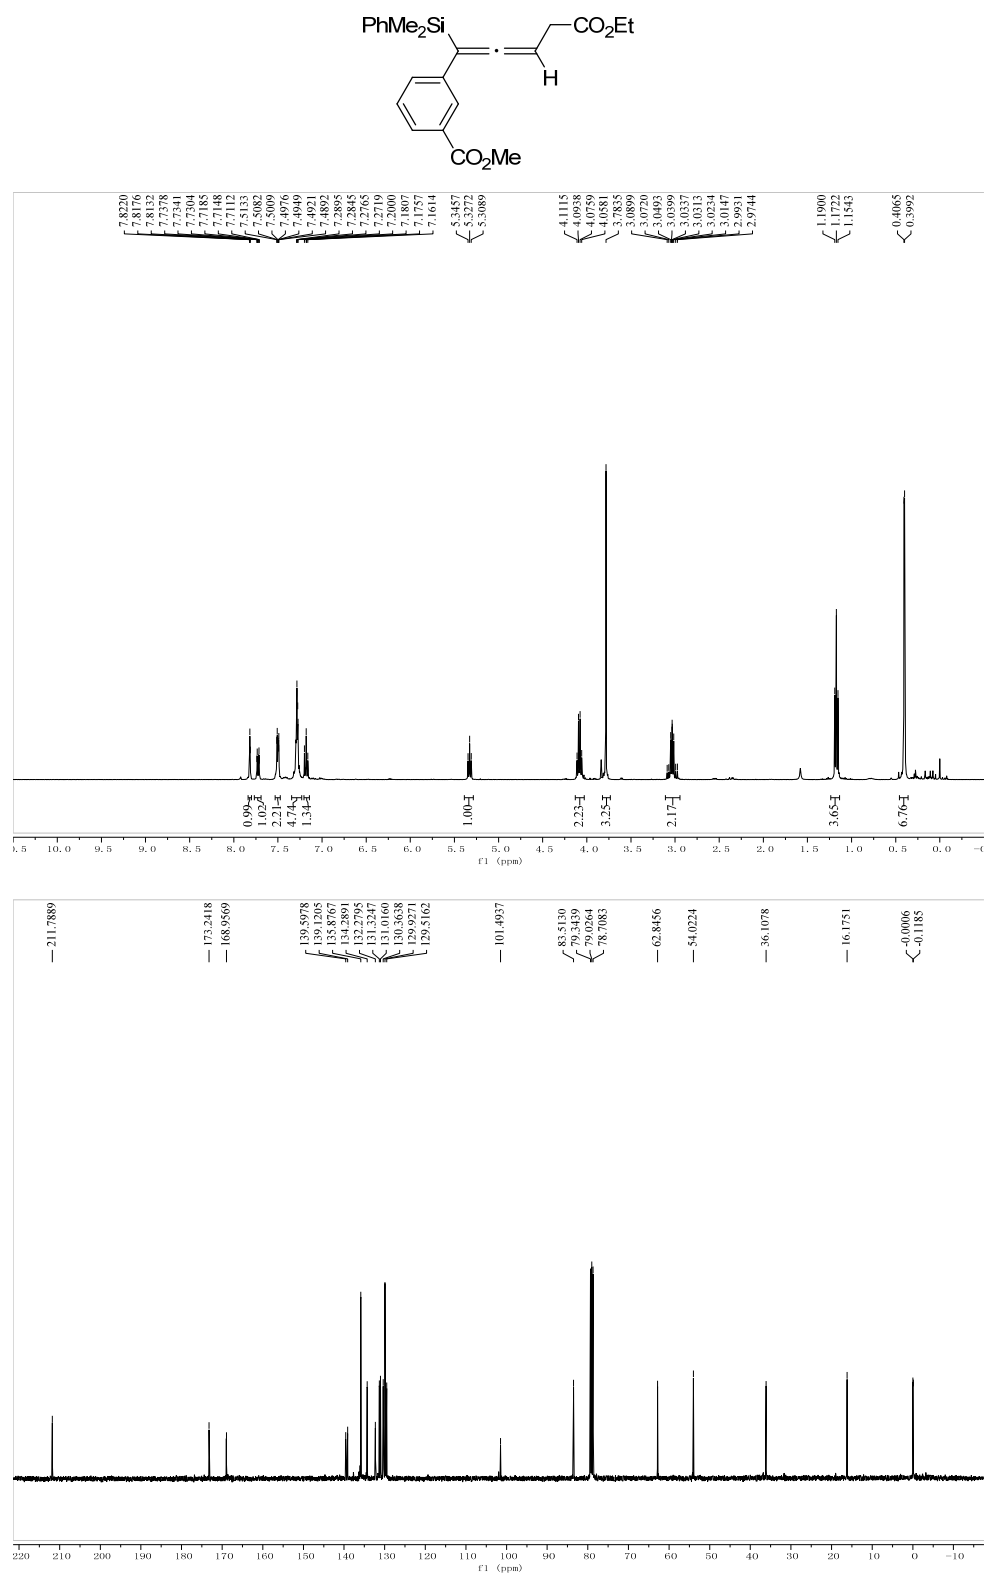

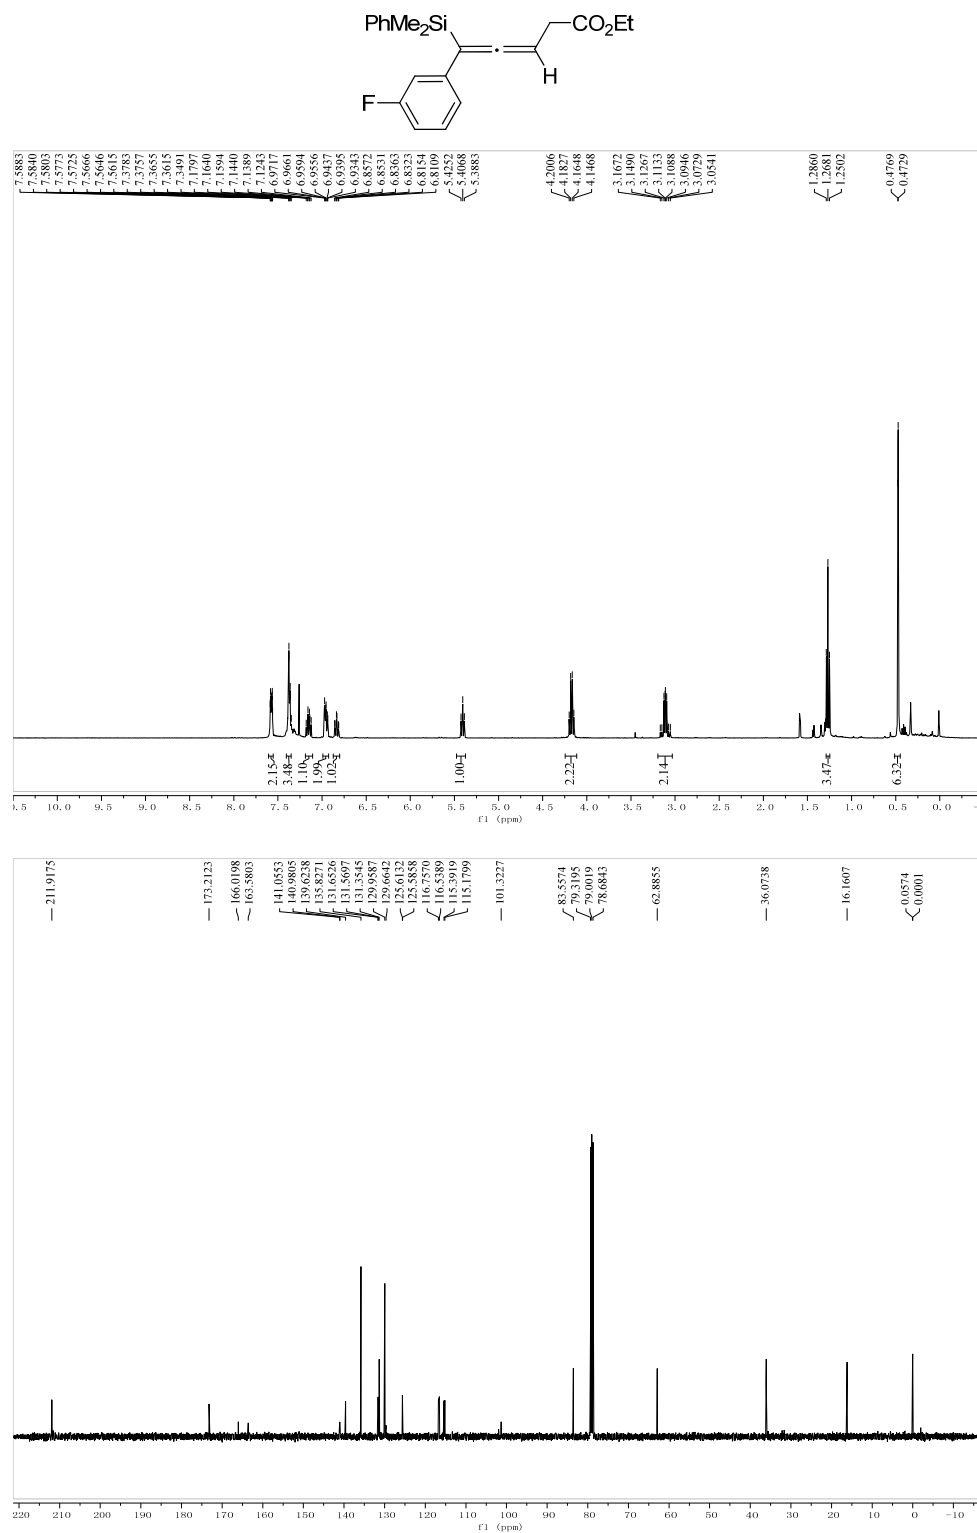

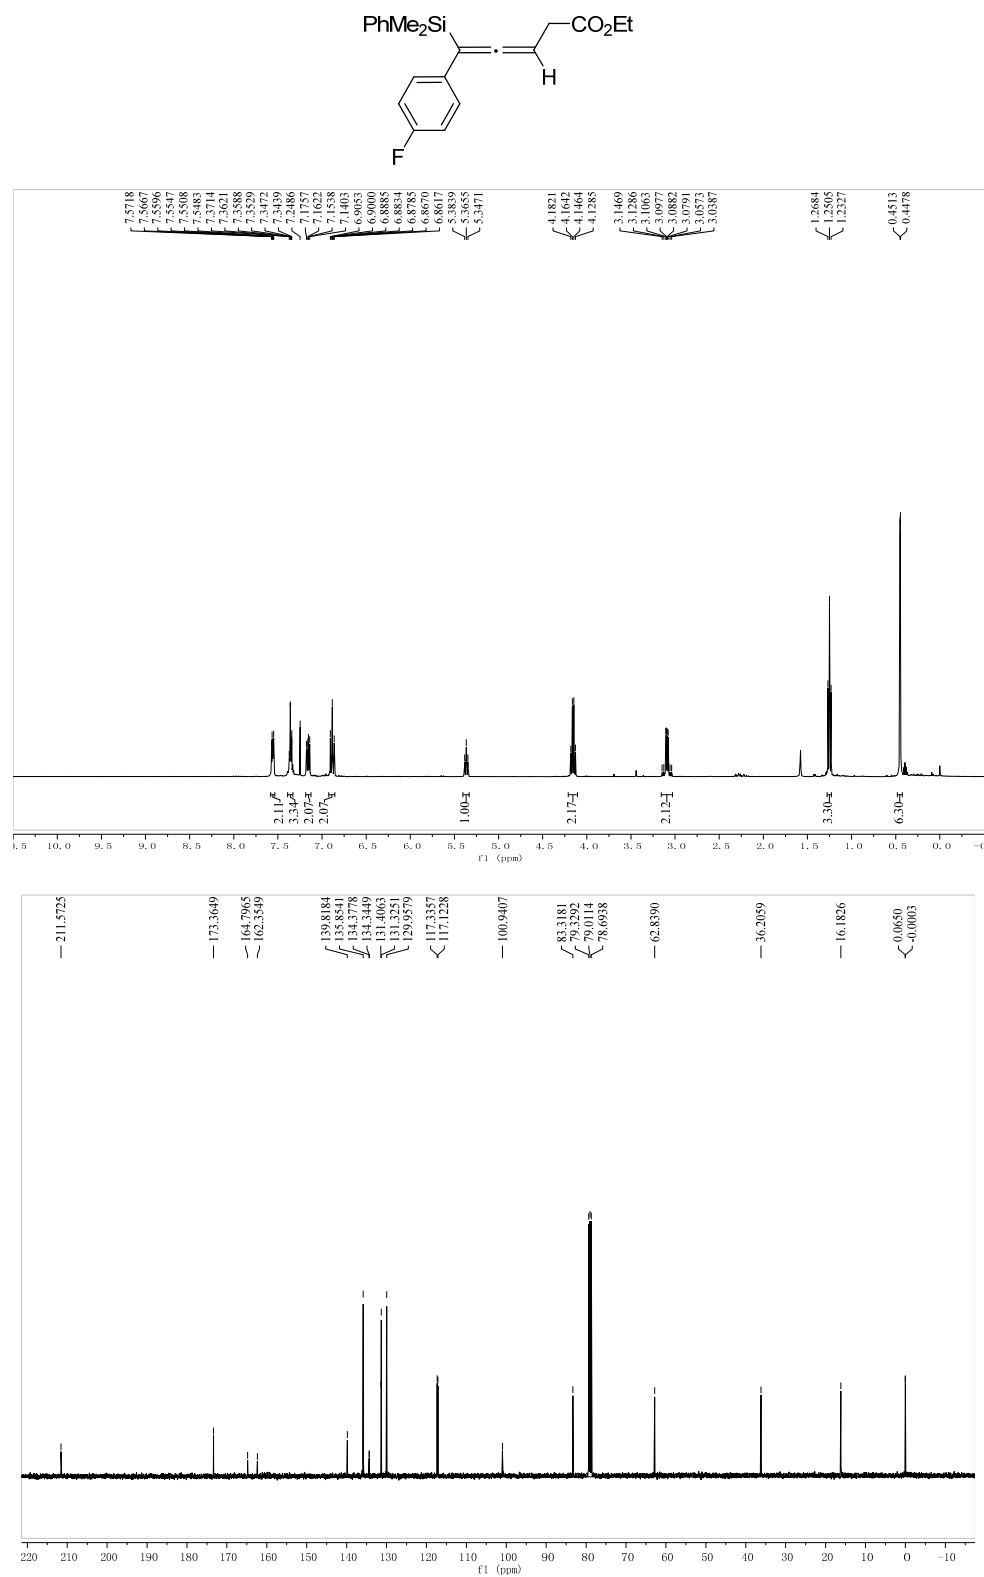

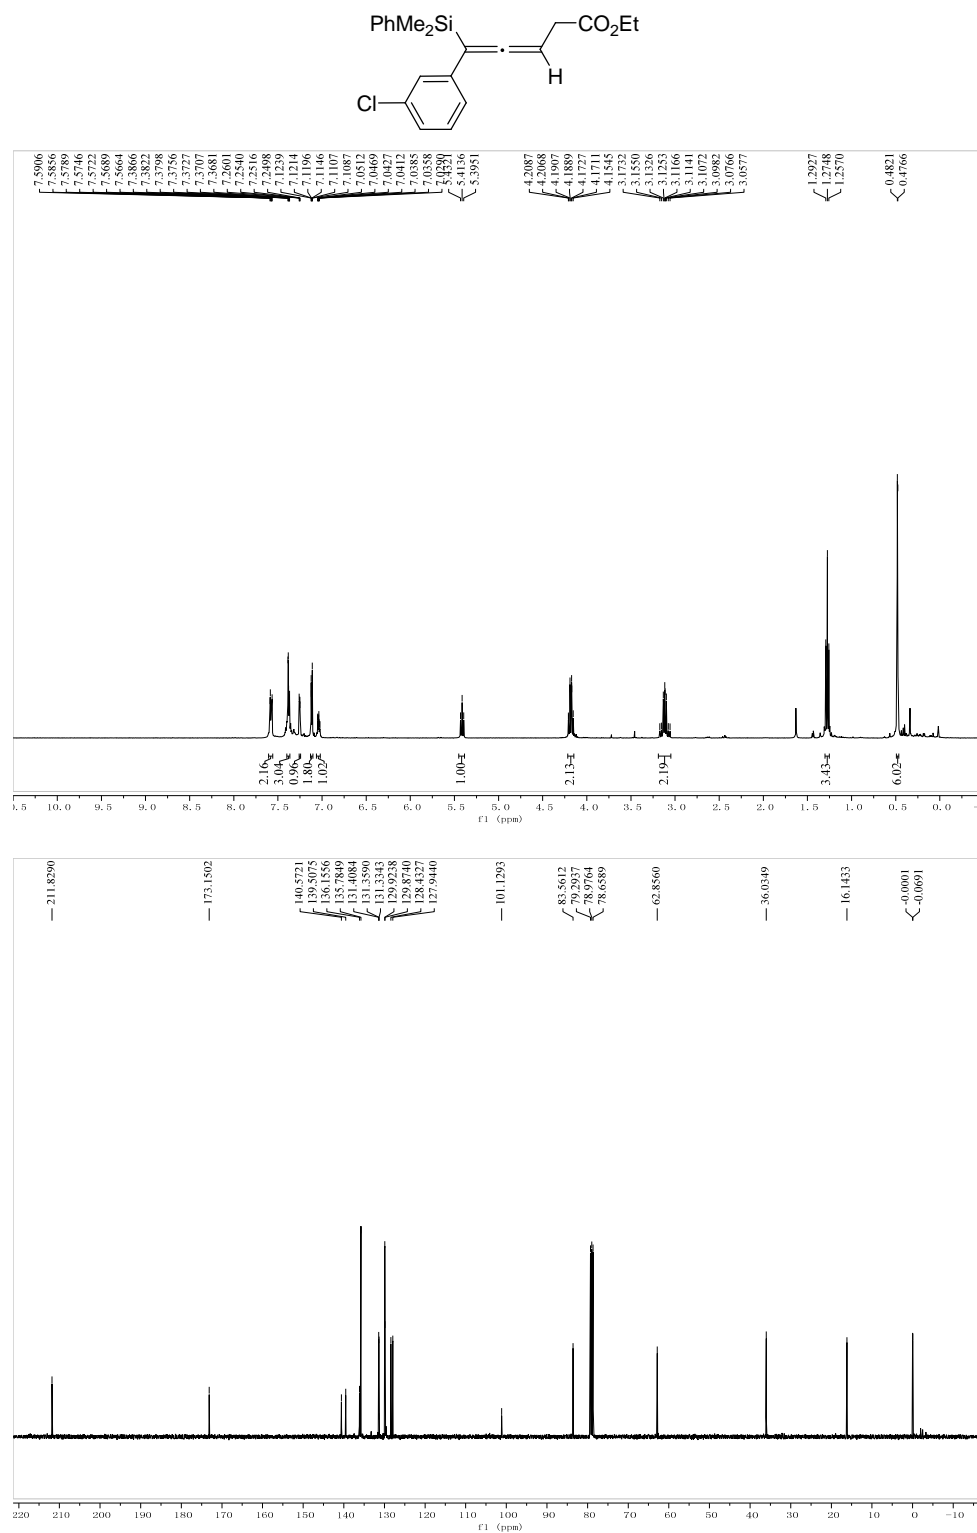

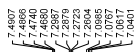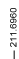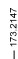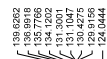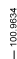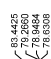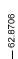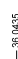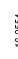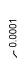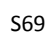

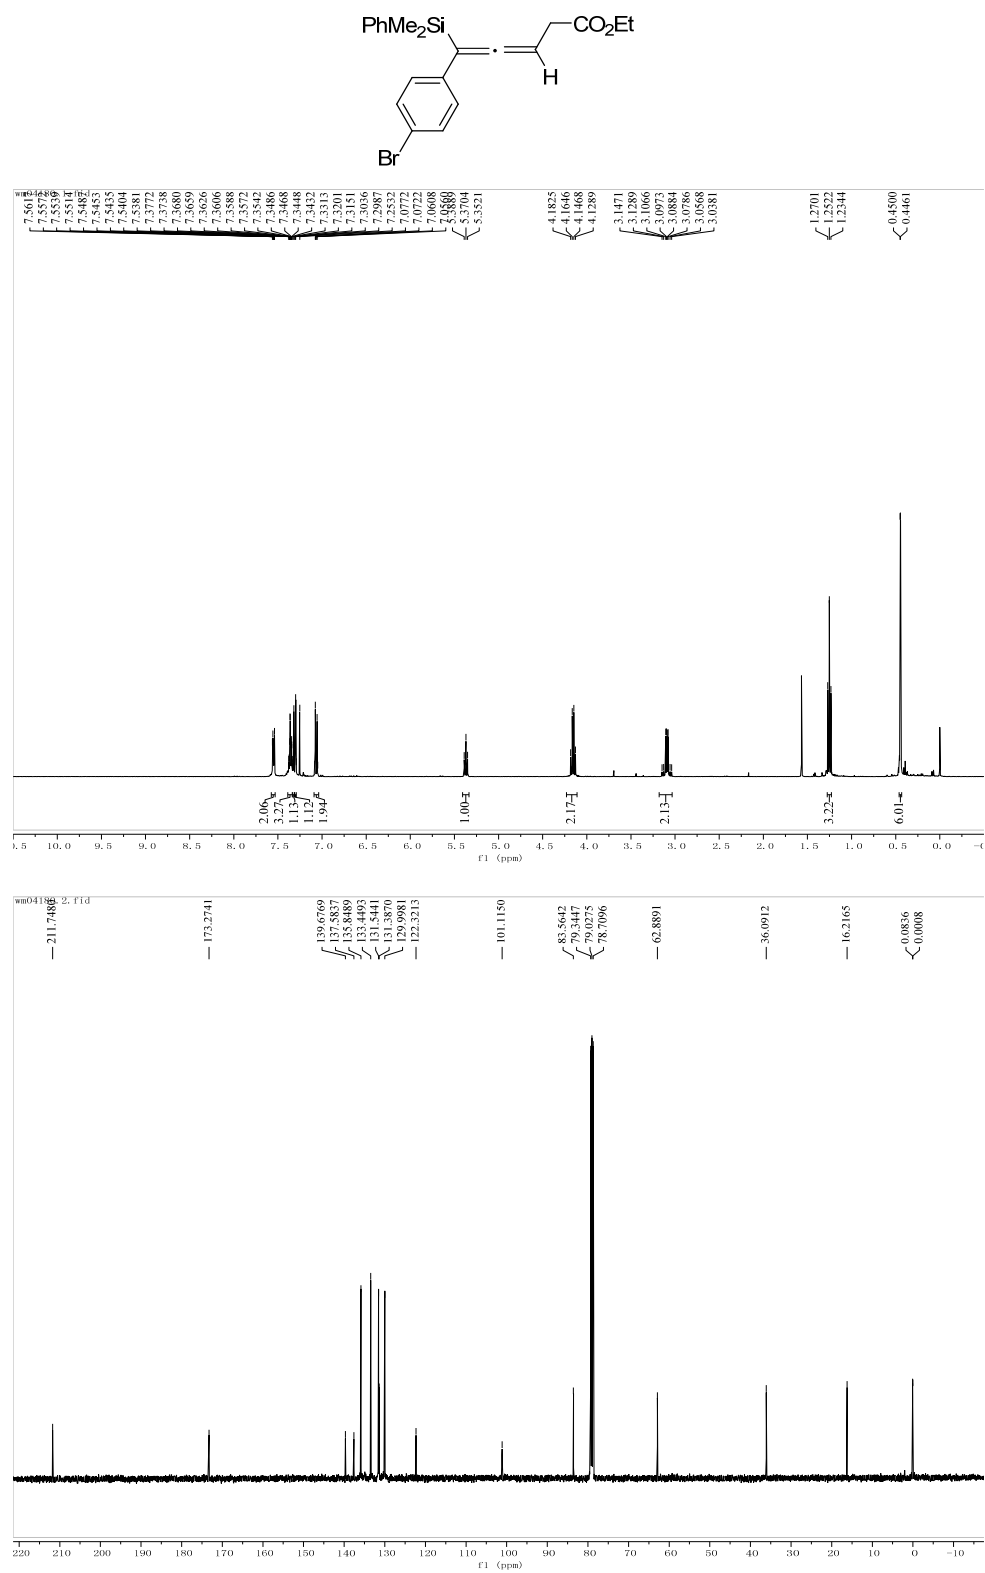

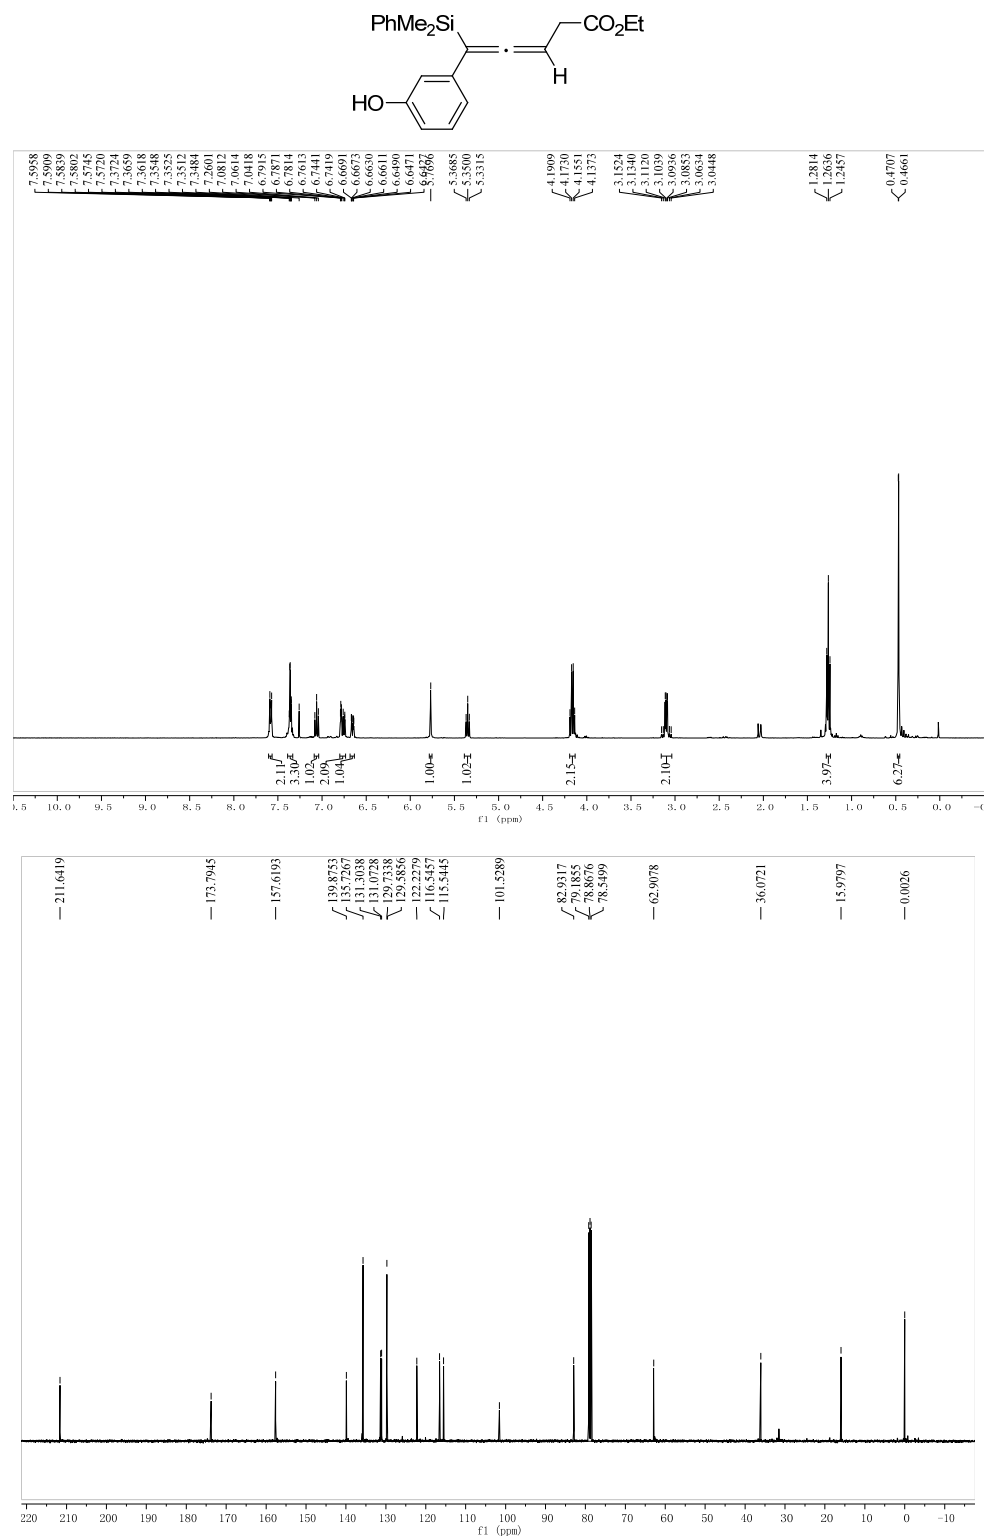

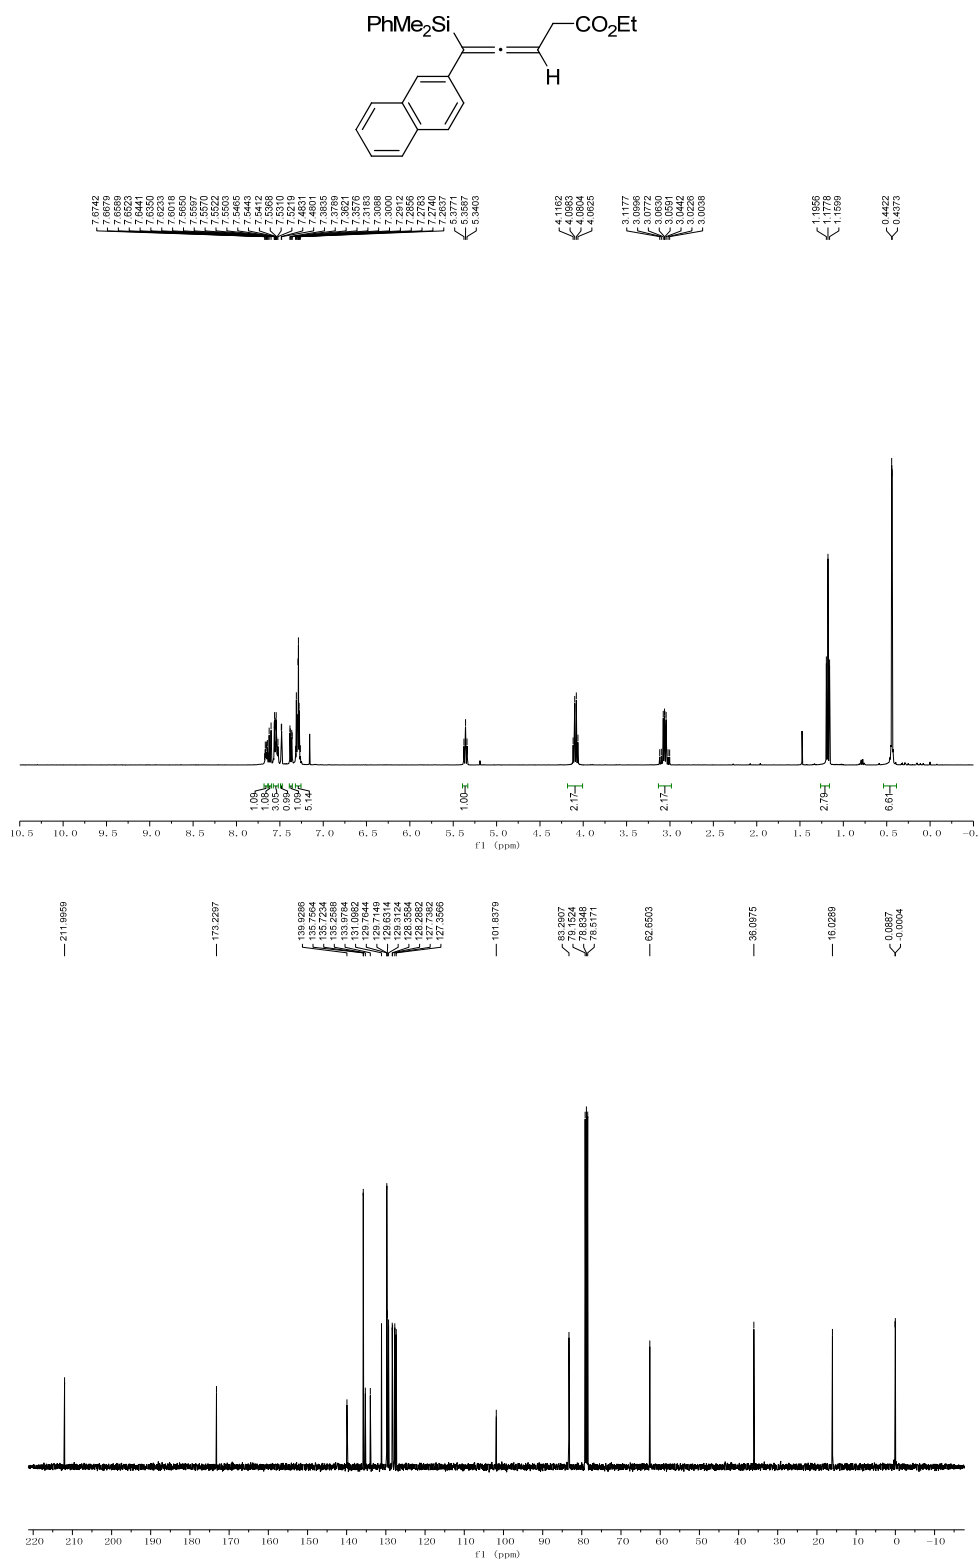



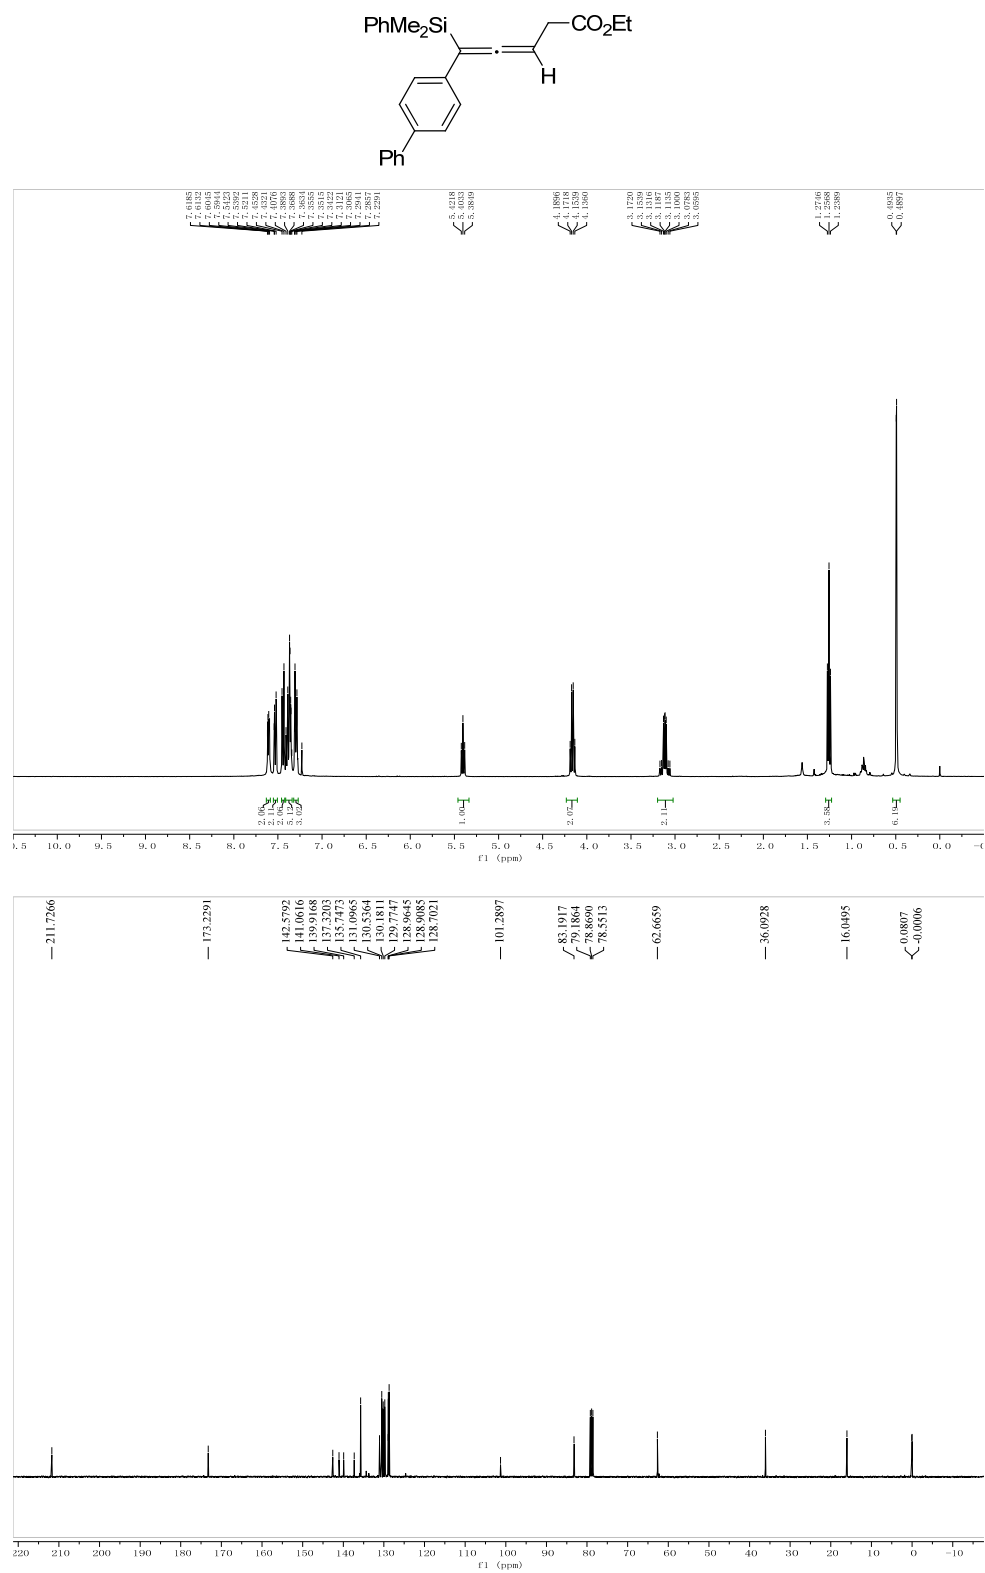

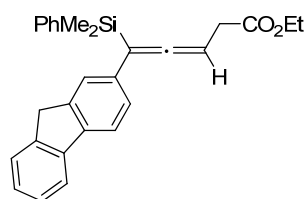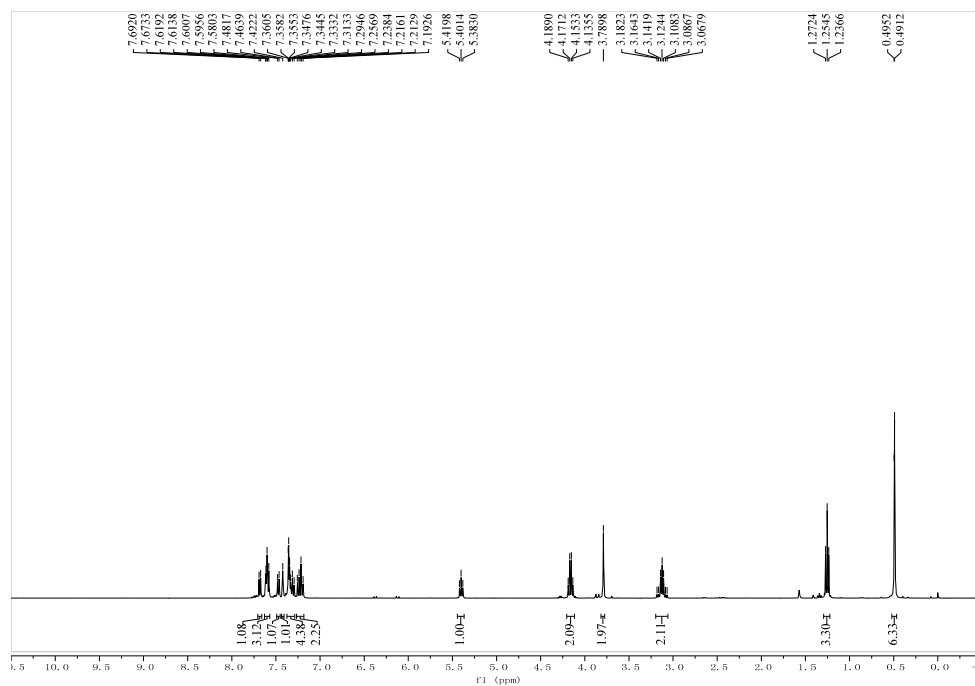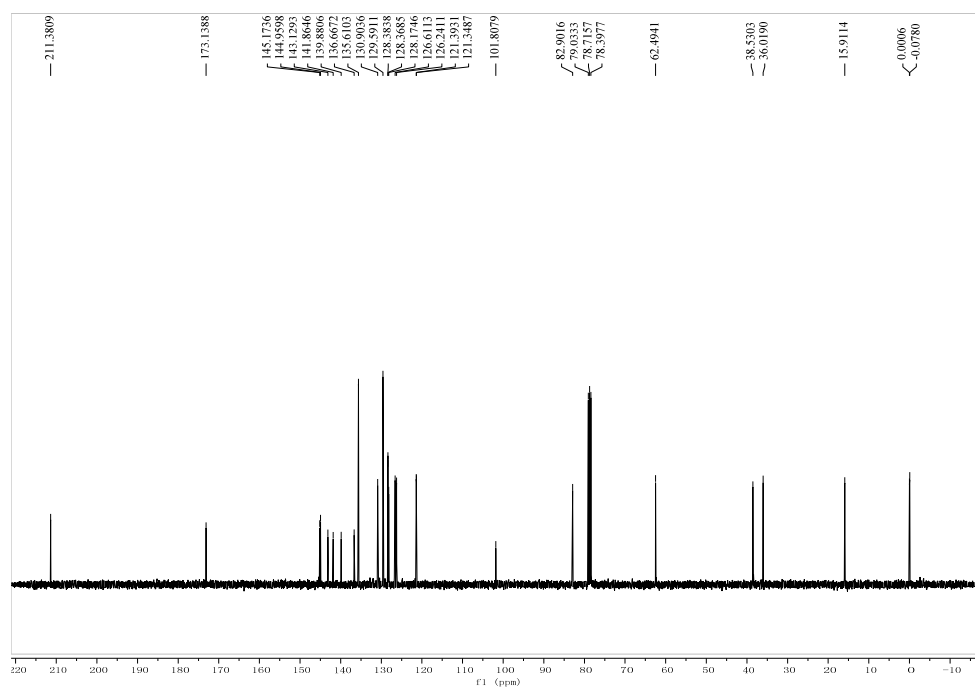

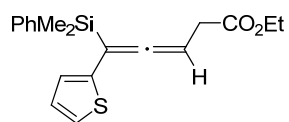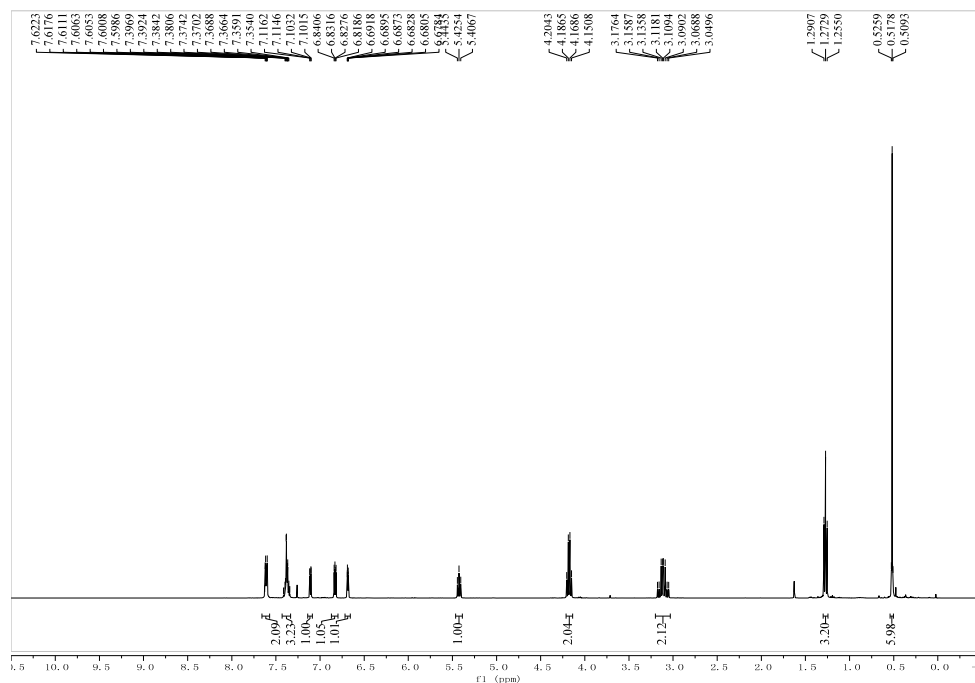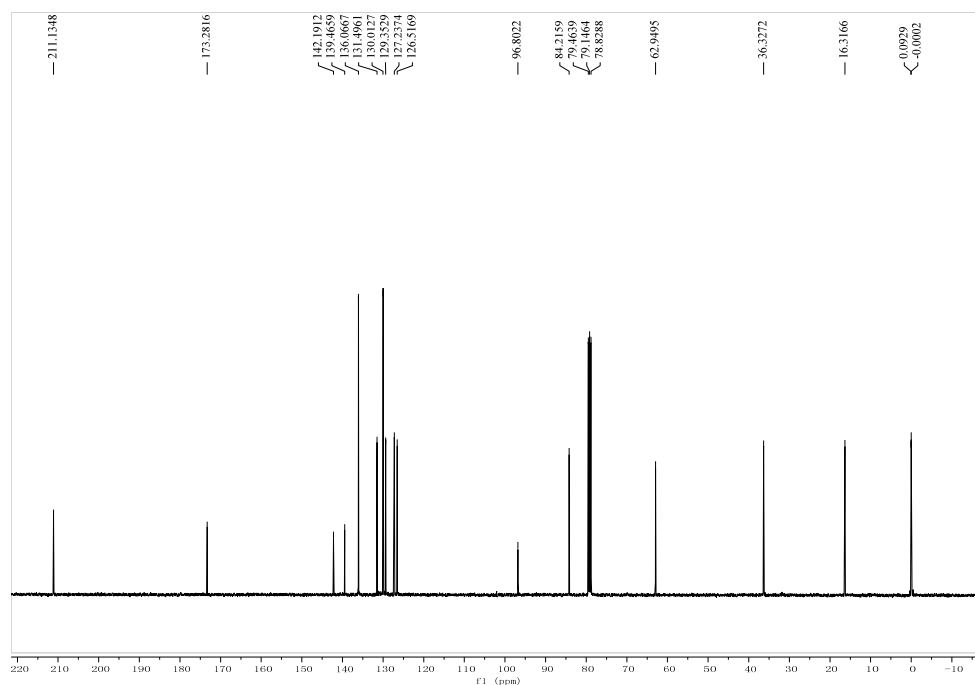

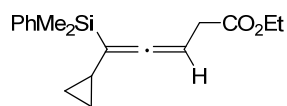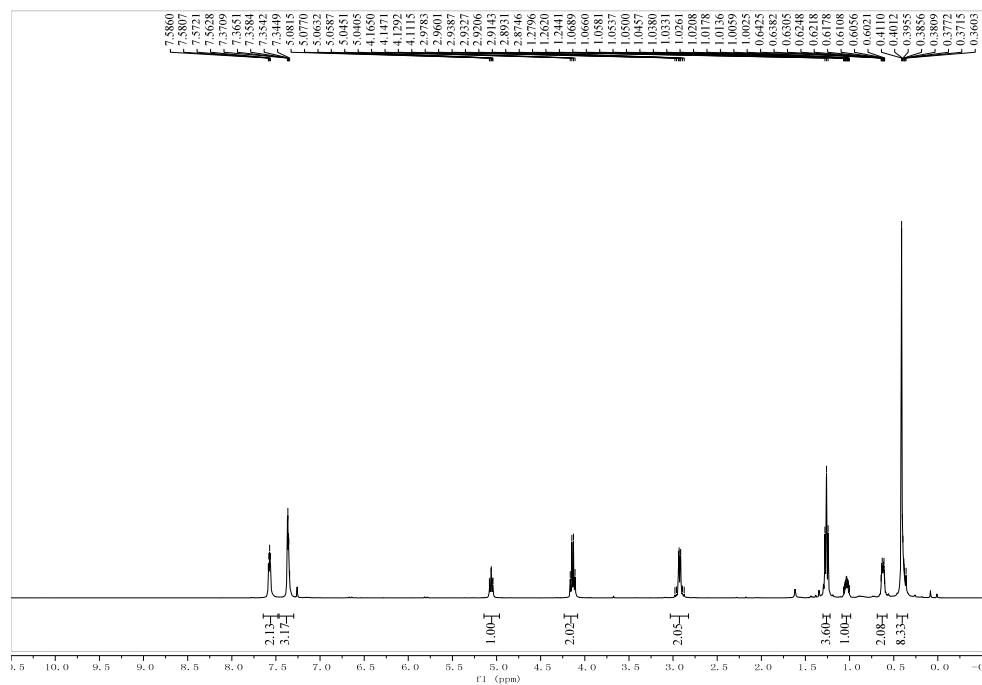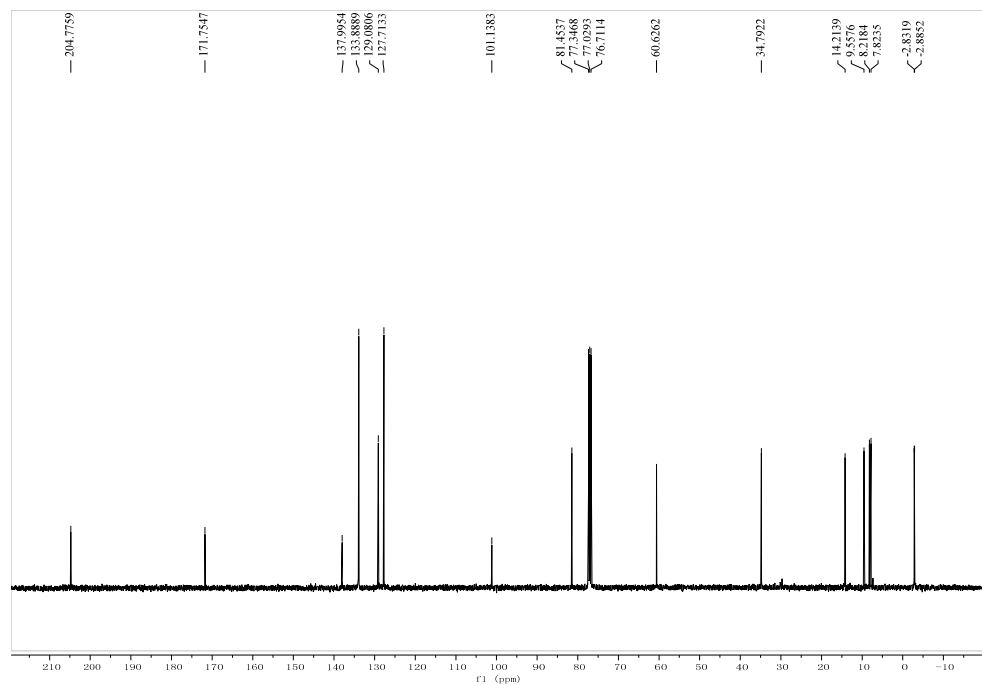

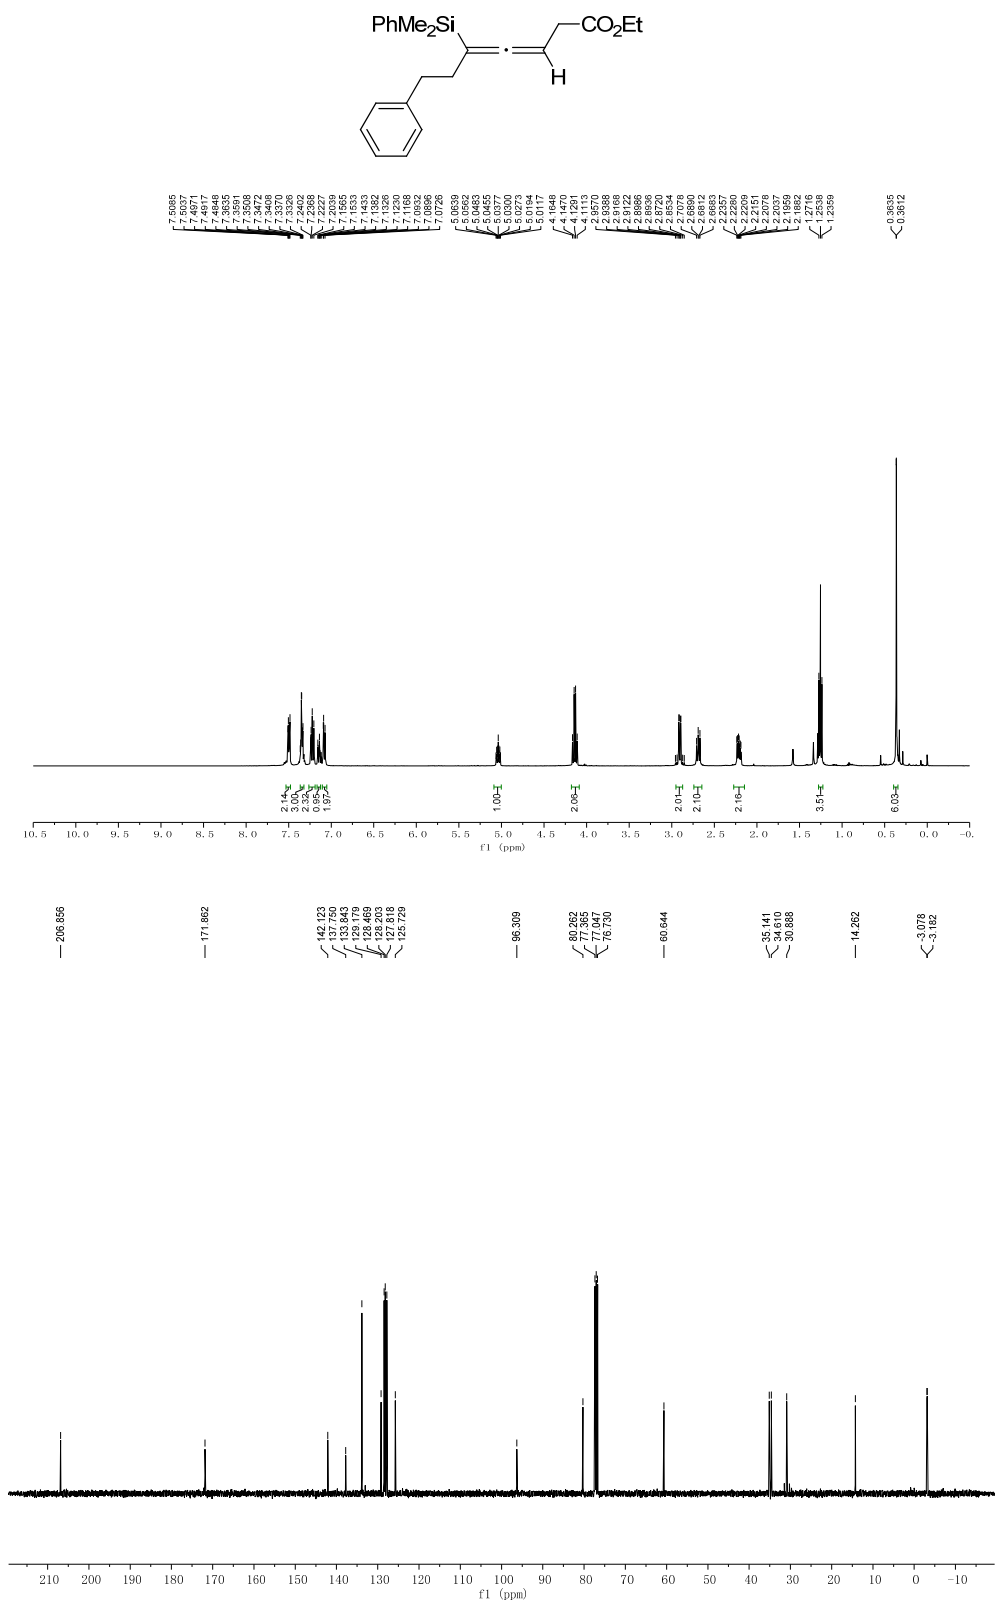

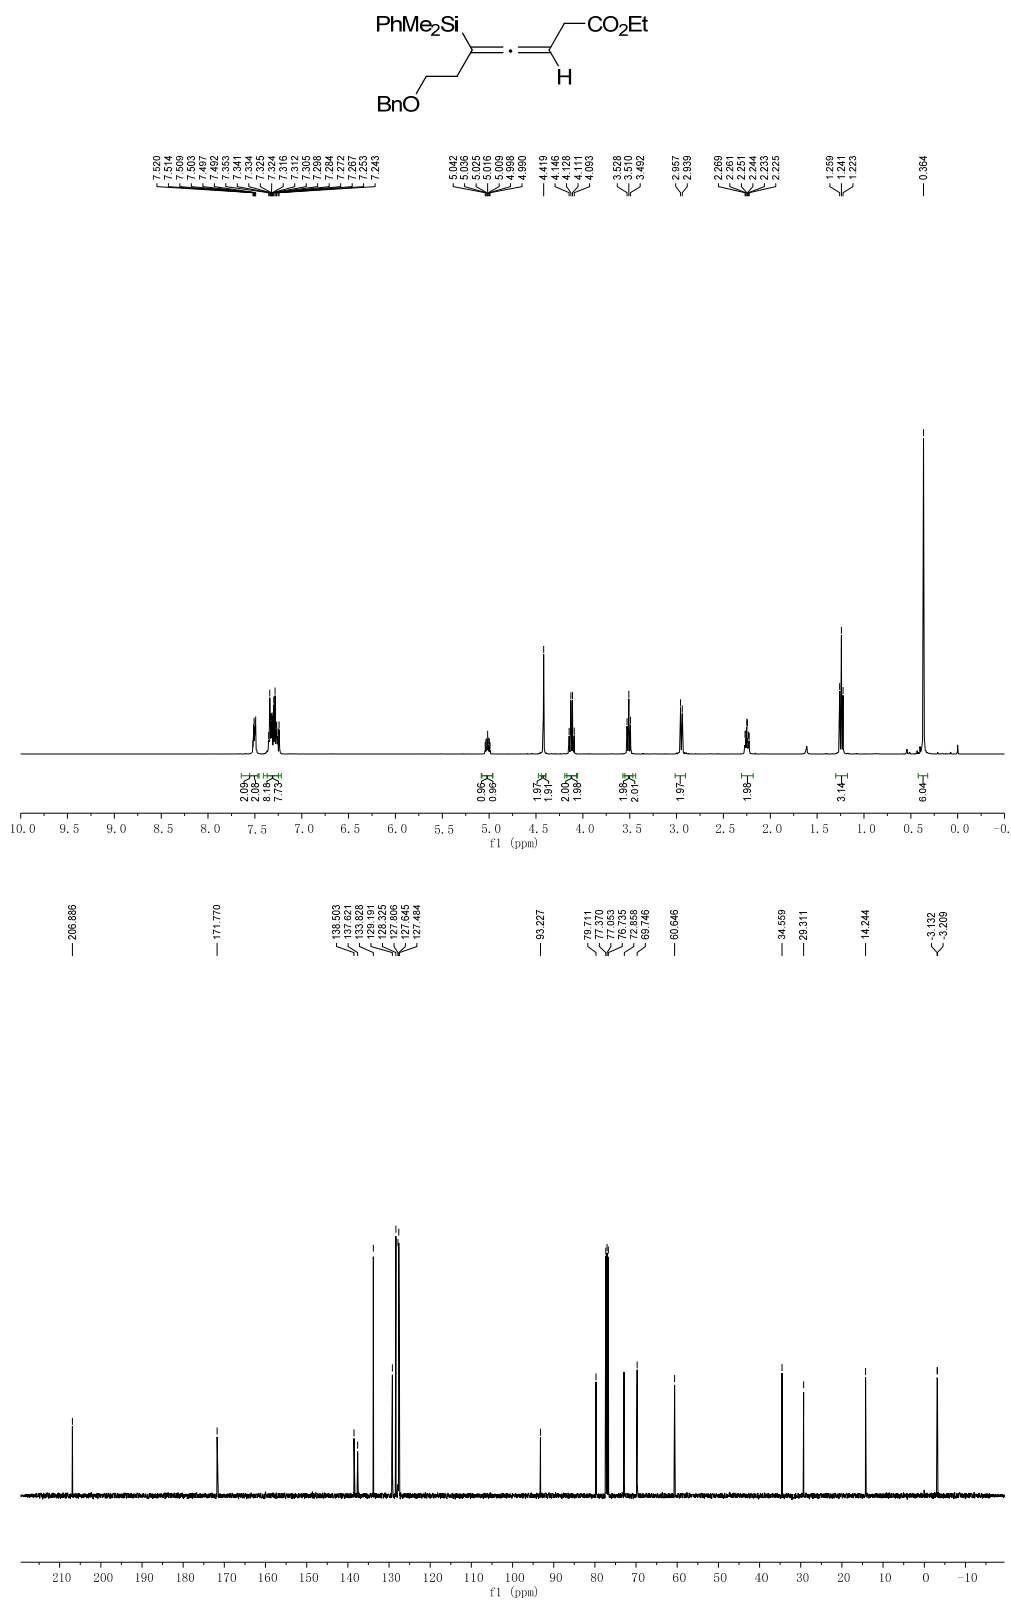

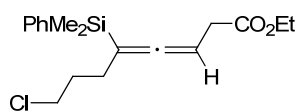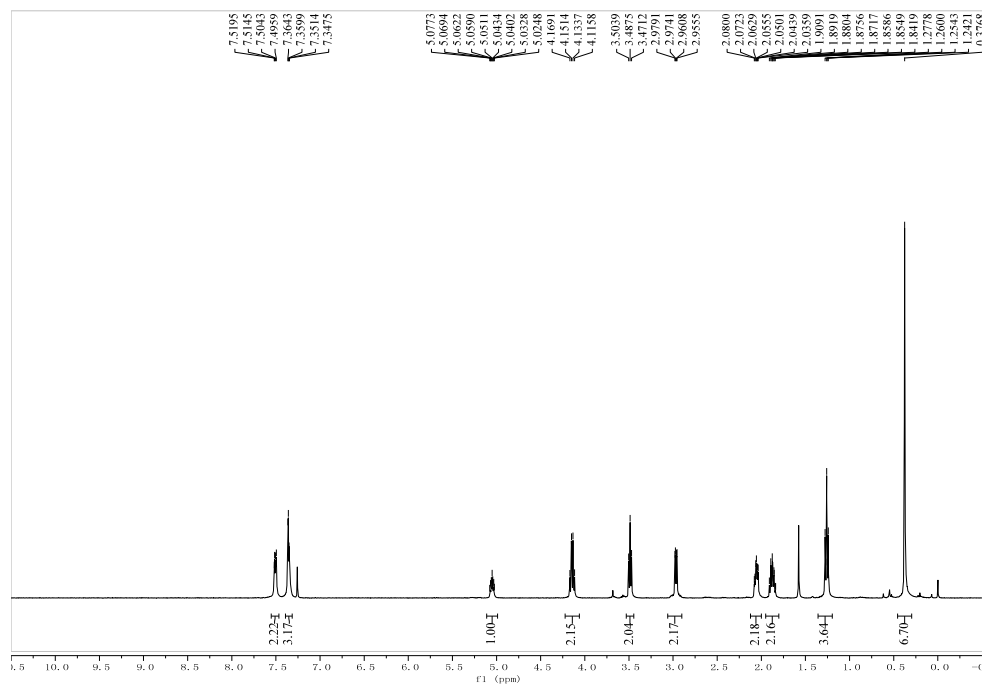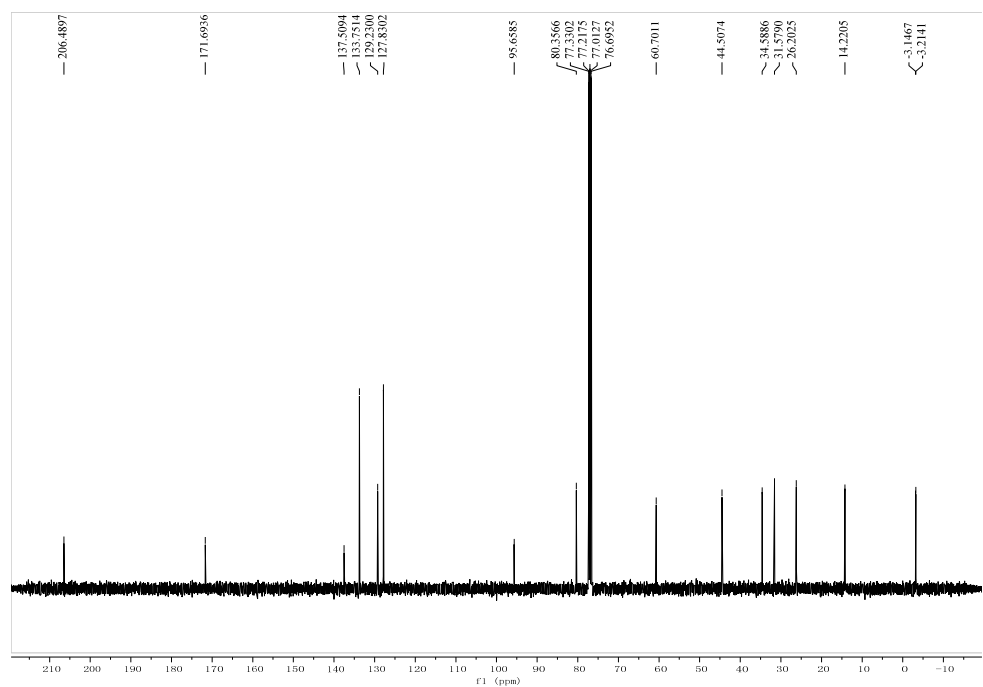

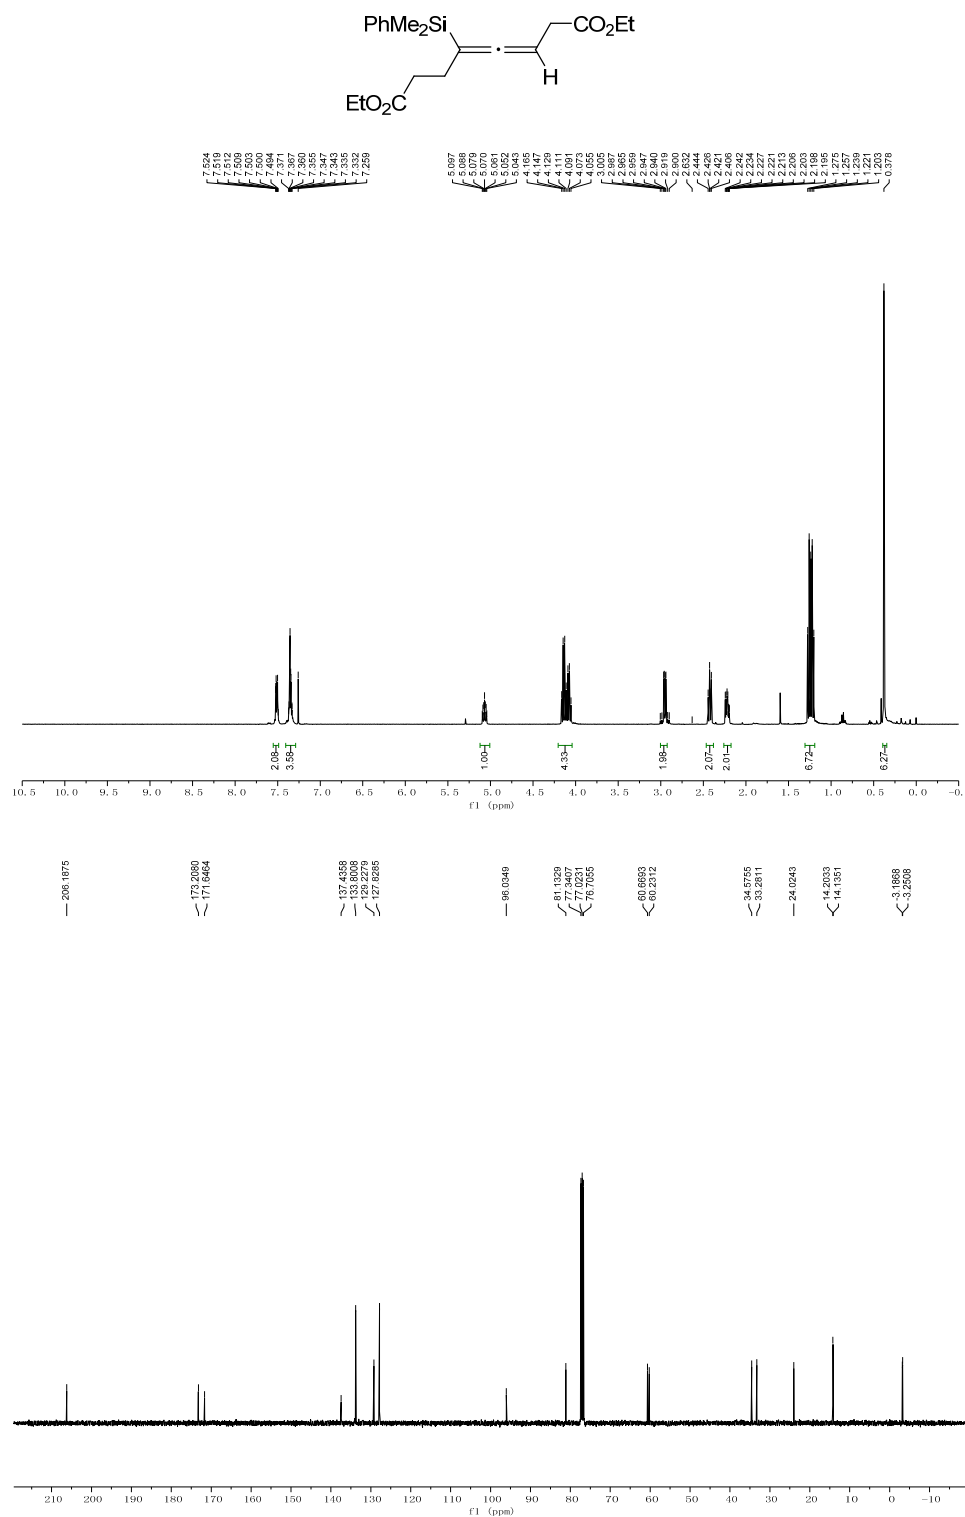



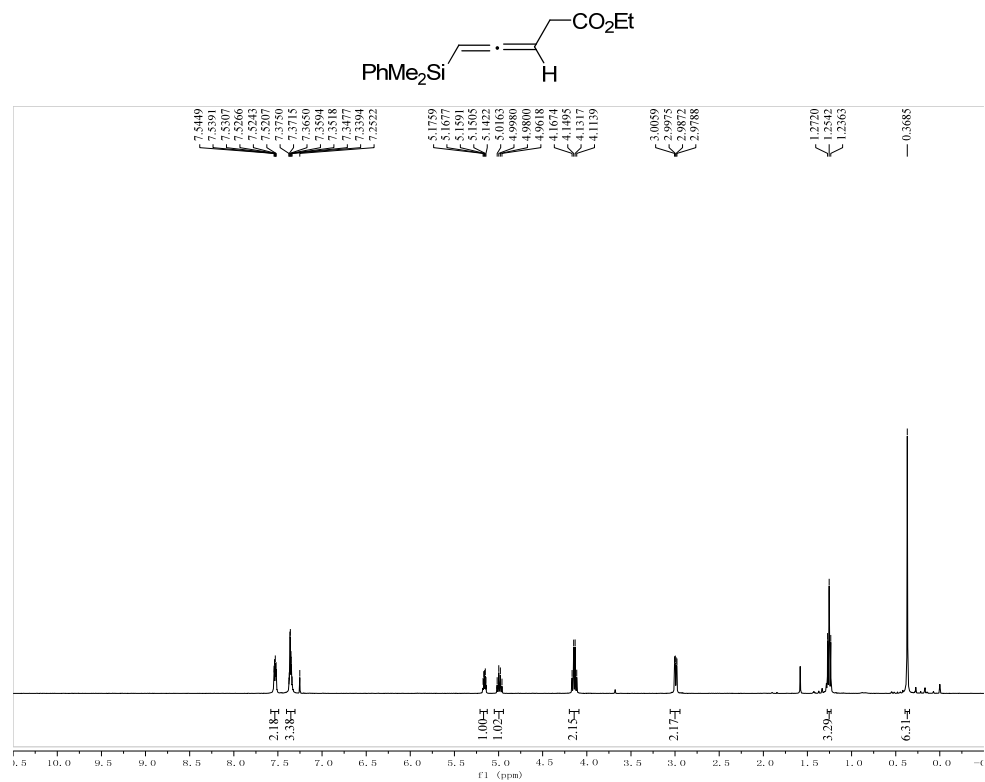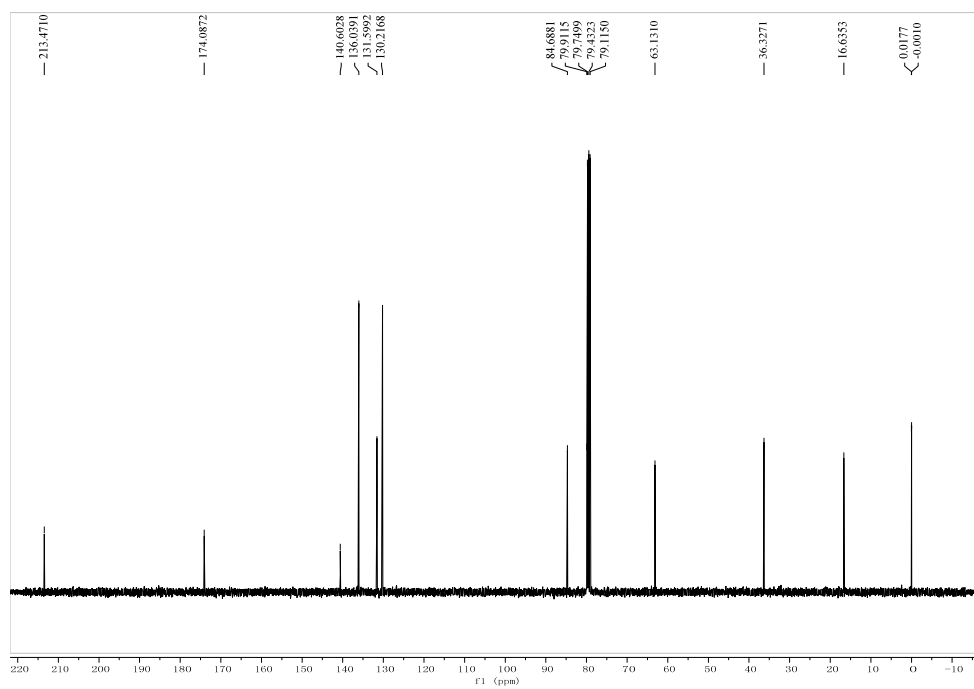

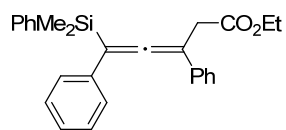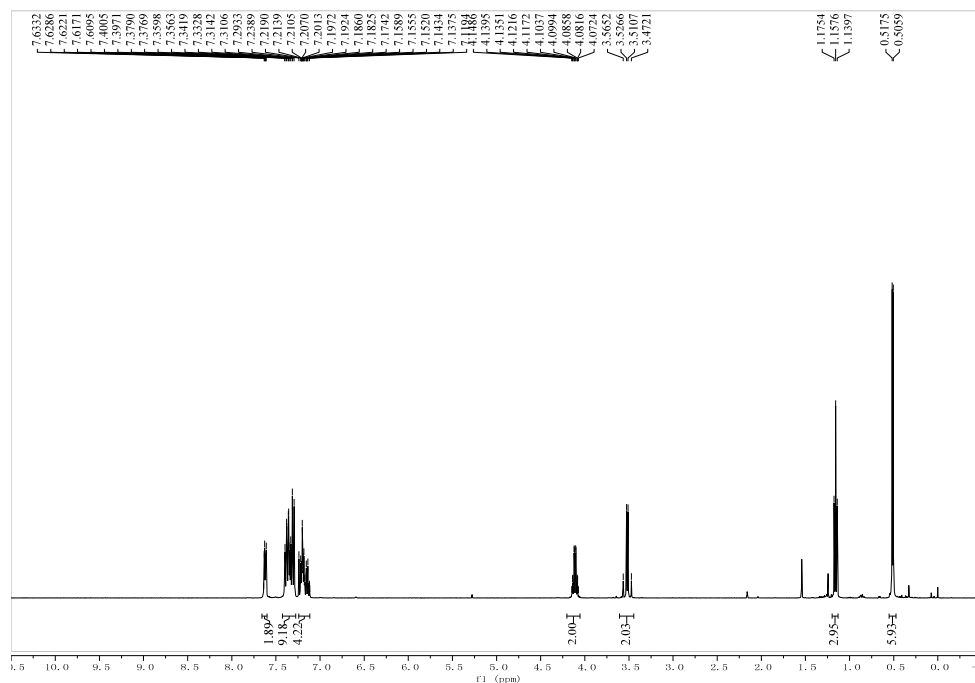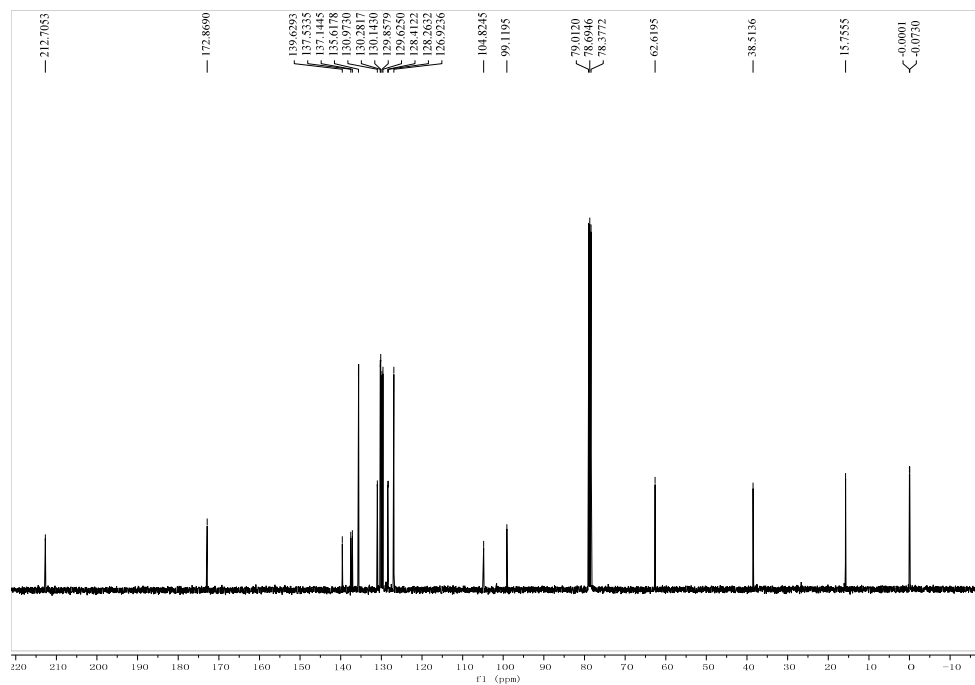

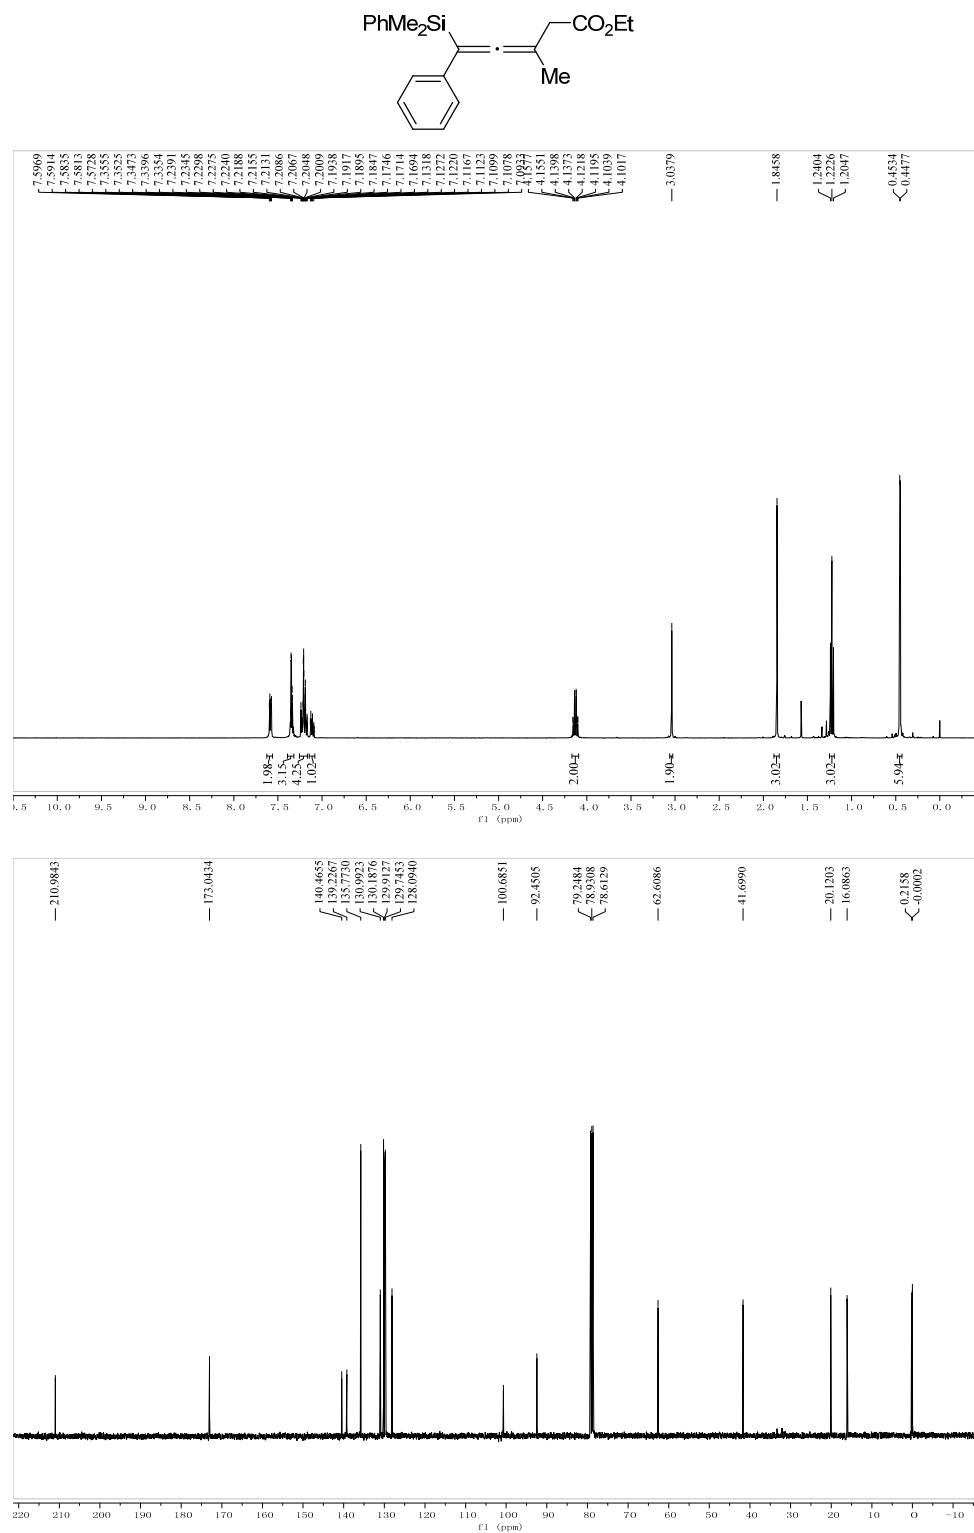

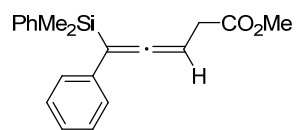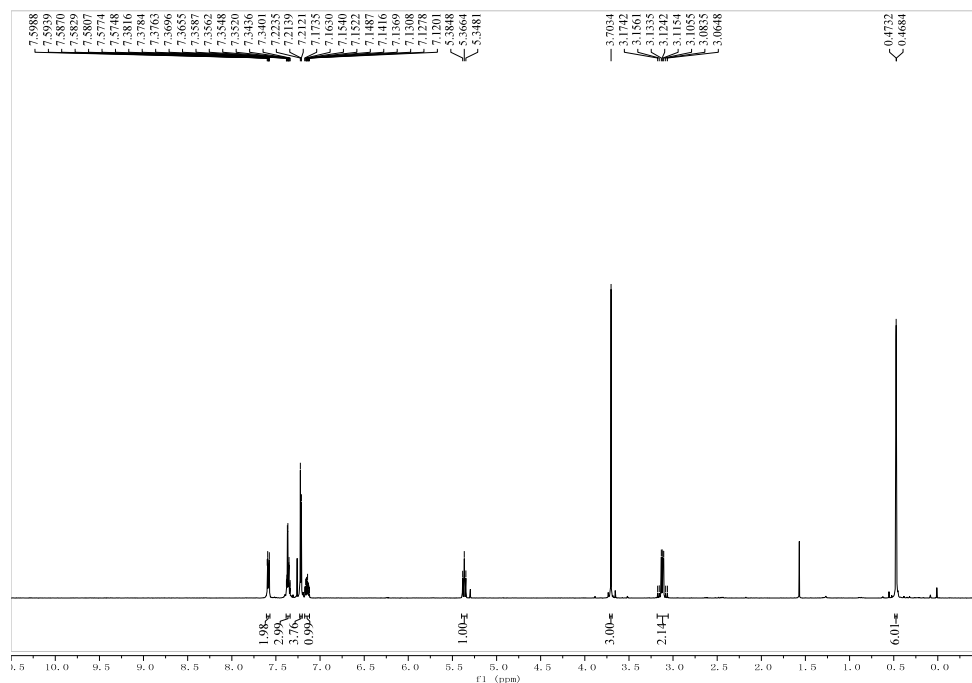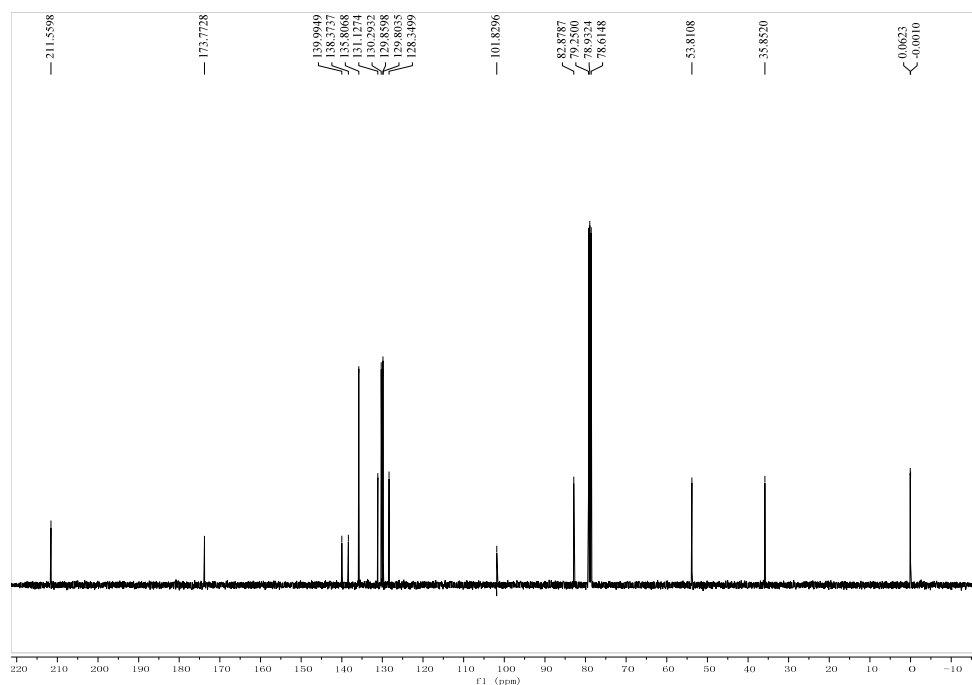

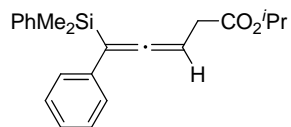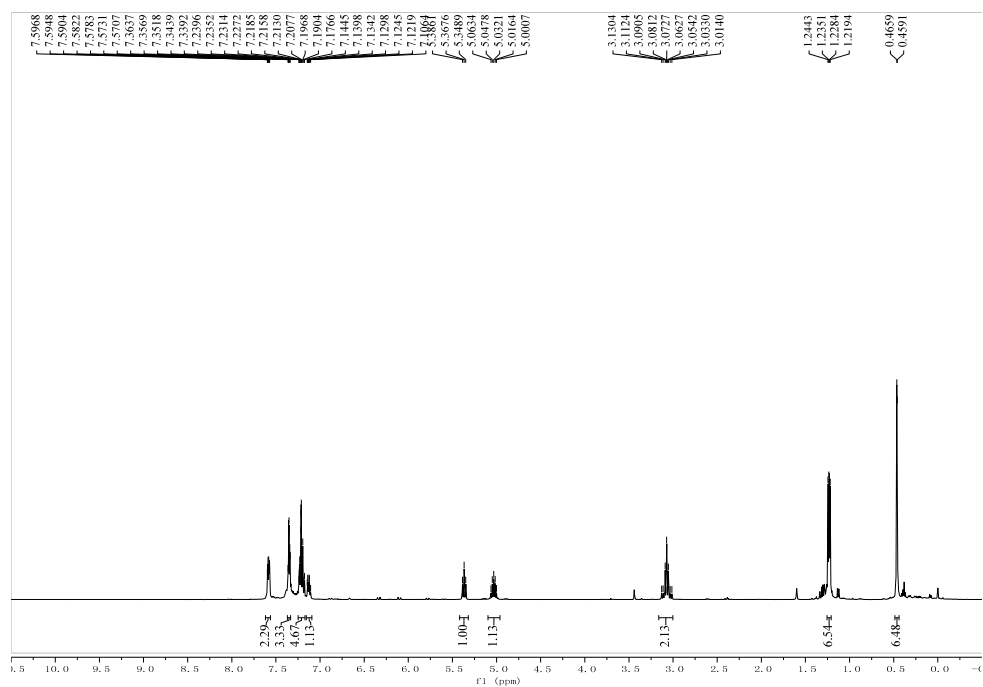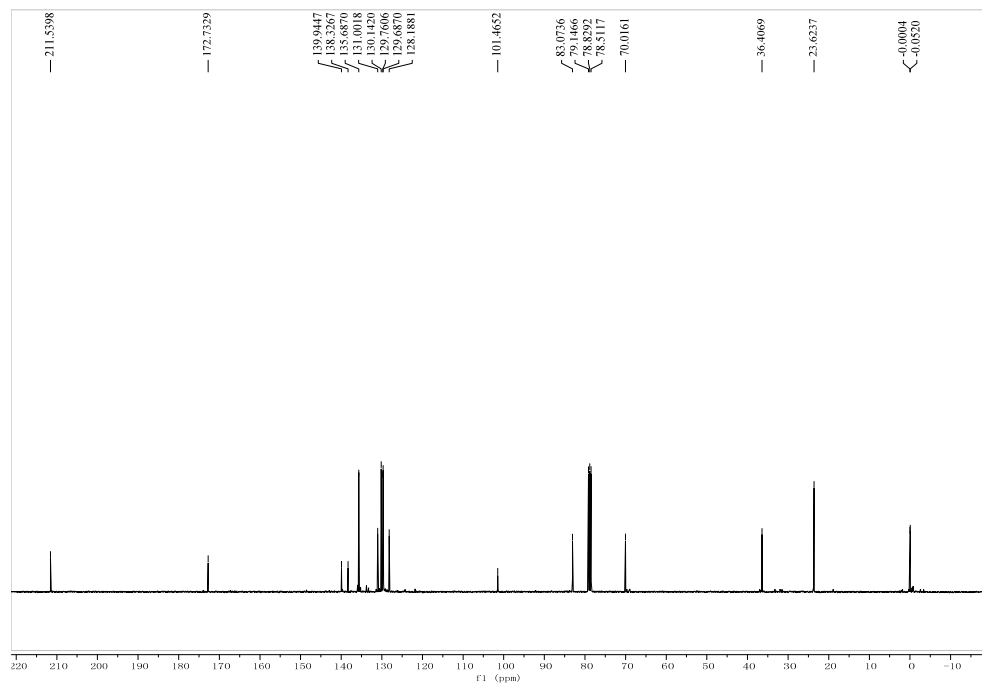

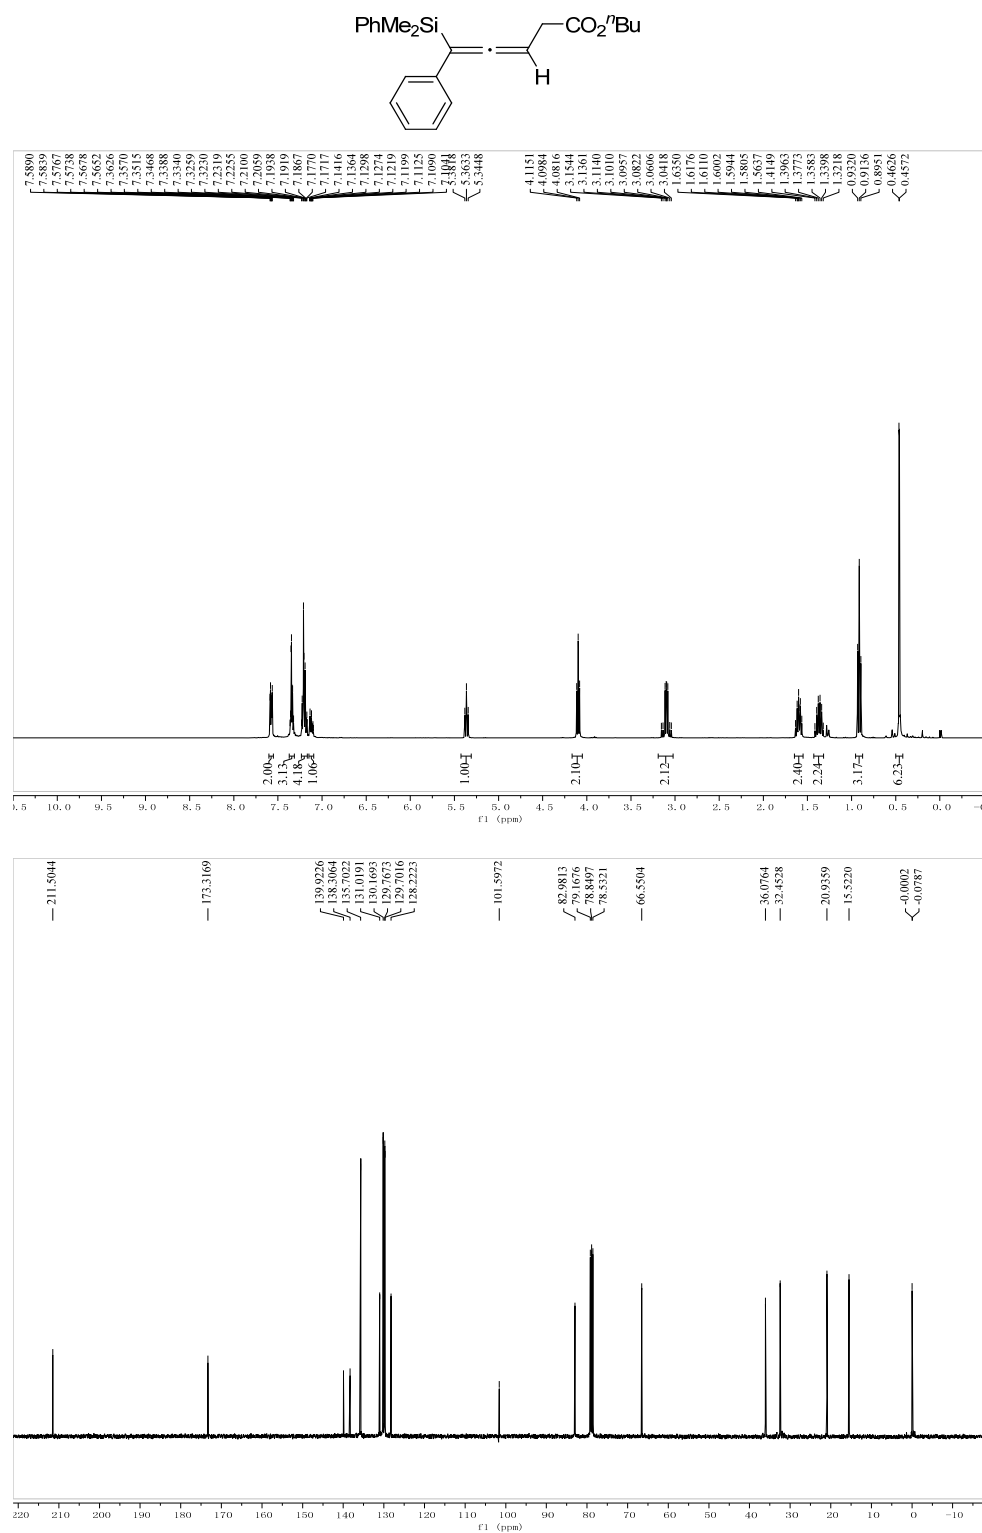

HPLC for chiral allenylsilane

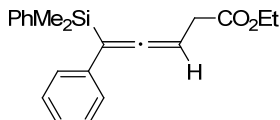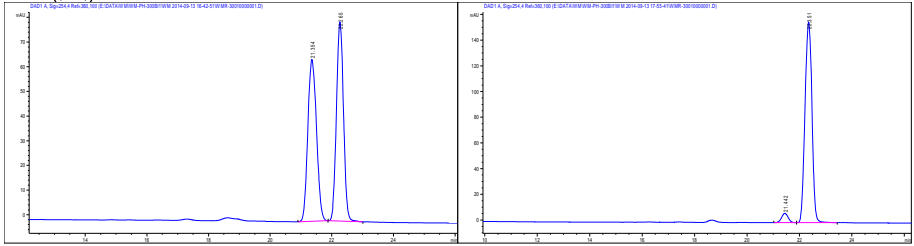

Signal 1: DAD1 A, Sig=254,4 Ref=360,100

Signal 1: DAD1 A, Sig=254,4 Ref=360,100

| Peak #   | RetTime [min] | Type | Width [min] | Area [mAU*s] | Height [mAU] | Area %  | Peak #   | RetTime [min] | Type | Width [min] | Area [mAU*s] | Height [mAU] | Area %  |
|----------|---------------|------|-------------|--------------|--------------|---------|----------|---------------|------|-------------|--------------|--------------|---------|
| 1        | 21.354        | BB   | 0.3129      | 1286.00977   | 65.55194     | 50.0475 | 1        | 21.442        | BB   | 0.2760      | 127.03123    | 7.26643      | 4.2104  |
| 2        | 22.265        | BB   | 0.2515      | 1283.56885   | 80.70587     | 49.9525 | 2        | 22.351        | BB   | 0.2980      | 2890.07813   | 156.09740    | 95.7896 |
| Totals : |               |      |             | 2569.57861   | 146.25781    |         | Totals : |               |      |             | 3017.10936   | 163.36383    |         |

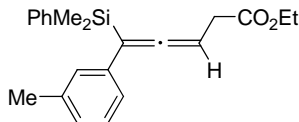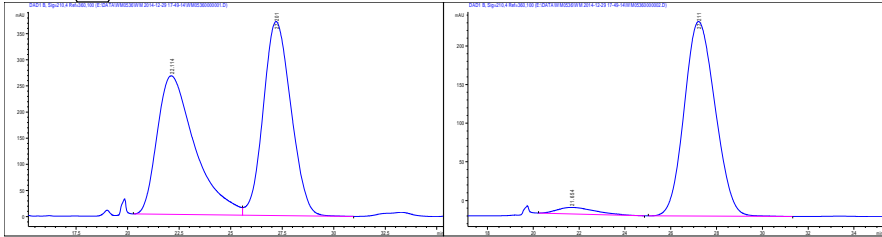

Signal 2: DAD1 B, Sig=210,4 Ref=360,100

Signal 2: DAD1 B, Sig=210,4 Ref=360,100

| Peak #   | RetTime [min] | Type | Width [min] | Area [mAU*s] | Height [mAU] | Area %  | Peak #   | RetTime [min] | Type | Width [min] | Area [mAU*s] | Height [mAU] | Area %  |
|----------|---------------|------|-------------|--------------|--------------|---------|----------|---------------|------|-------------|--------------|--------------|---------|
| 1        | 22.114        | BV   | 1.8886      | 3.37817e4    | 265.12143    | 49.3282 | 1        | 21.654        | BB   | 1.3490      | 959.69135    | 8.33680      | 3.9124  |
| 2        | 27.201        | VB   | 1.4509      | 3.47018e4    | 371.13174    | 50.6718 | 2        | 27.211        | BB   | 1.4685      | 2.35699e4    | 251.68980    | 96.0876 |
| Totals : |               |      |             | 6.84834e4    | 636.25317    |         | Totals : |               |      |             | 2.45296e4    | 260.02660    |         |

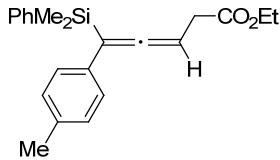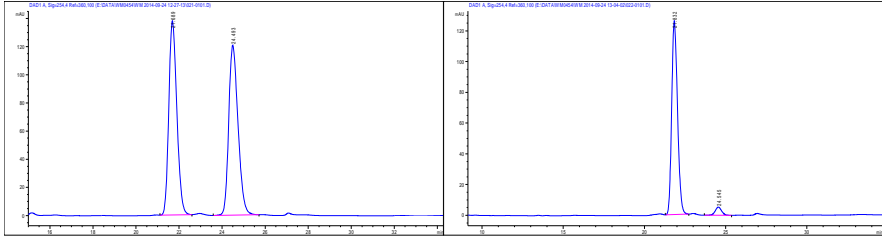

Signal 1: DAD1 A, Sig=254,4 Ref=360,100

| Peak # | RetTime [min] | Type | Width [min] | Area [mAU*s] | Height [mAU] | Area %  |
|--------|---------------|------|-------------|--------------|--------------|---------|
| 1      | 21.689        | BB   | 0.3996      | 3566.28784   | 137.97507    | 49.5867 |
| 2      | 24.493        | BB   | 0.4663      | 3625.74023   | 120.75926    | 50.4133 |

Totals : 7192.02808 258.73433

Signal 1: DAD1 A, Sig=254,4 Ref=360,100

| Peak # | RetTime [min] | Type | Width [min] | Area [mAU*s] | Height [mAU] | Area %  |
|--------|---------------|------|-------------|--------------|--------------|---------|
| 1      | 21.832        | BB   | 0.3874      | 3148.87622   | 126.07990    | 95.6191 |
| 2      | 24.545        | BB   | 0.4182      | 144.26875    | 5.28990      | 4.3809  |

Totals : 3293.14497 131.36980

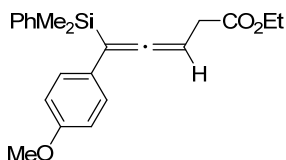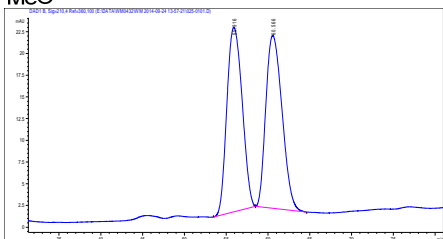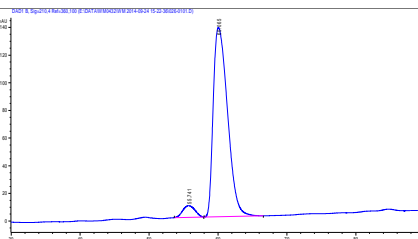

Signal 2: DAD1 B, Sig=210,4 Ref=360,100

| Peak # | RetTime [min] | Type | Width [min] | Area [mAU*s] | Height [mAU] | Area %  |
|--------|---------------|------|-------------|--------------|--------------|---------|
| 1      | 55.916        | BB   | 1.9766      | 2697.56128   | 21.22772     | 50.1588 |
| 2      | 60.566        | BB   | 1.9772      | 2680.48242   | 19.87842     | 49.8412 |

Totals : 5378.04370 41.10614

Signal 2: DAD1 B, Sig=210,4 Ref=360,100

| Peak # | RetTime [min] | Type | Width [min] | Area [mAU*s] | Height [mAU] | Area %  |
|--------|---------------|------|-------------|--------------|--------------|---------|
| 1      | 55.741        | MM R | 1.5056      | 1051.19055   | 8.46832      | 5.0606  |
| 2      | 60.065        | BB   | 2.2519      | 1.97209e4    | 136.95995    | 94.9394 |

Totals : 2.07721e4 145.42826

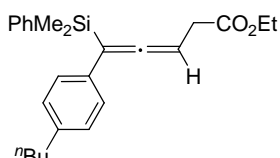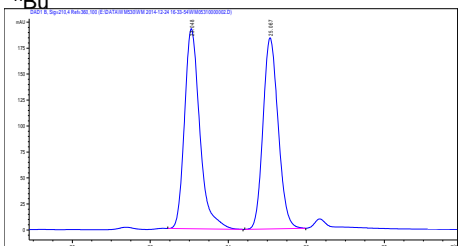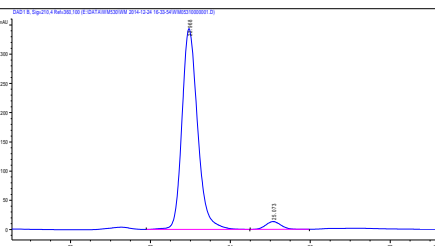

Signal 2: DAD1 B, Sig=210,4 Ref=360,100

| Peak # | RetTime [min] | Type | Width [min] | Area [mAU*s] | Height [mAU] | Area %  |
|--------|---------------|------|-------------|--------------|--------------|---------|
| 1      | 23.048        | BB   | 0.4161      | 5250.86572   | 192.60344    | 51.4024 |
| 2      | 25.067        | BB   | 0.4207      | 4964.34912   | 184.04930    | 48.5976 |

Totals : 1.02152e4 376.65274

Signal 2: DAD1 B, Sig=210,4 Ref=360,100

| Peak # | RetTime [min] | Type | Width [min] | Area [mAU*s] | Height [mAU] | Area %  |
|--------|---------------|------|-------------|--------------|--------------|---------|
| 1      | 22.968        | BB   | 0.4173      | 9341.26270   | 343.43756    | 96.3814 |
| 2      | 25.073        | BB   | 0.4135      | 350.71884    | 13.22050     | 3.6186  |

Totals : 9691.98154 356.65807

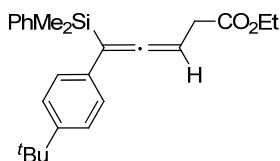



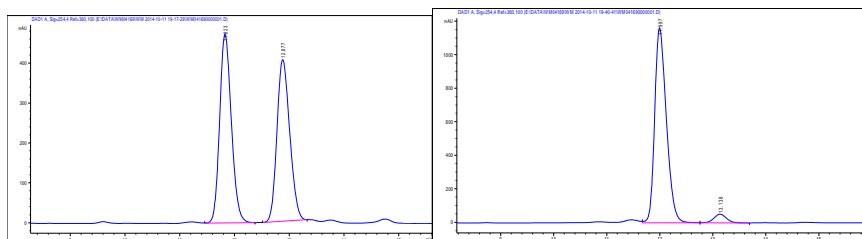

Signal 1: DAD1 A, Sig=254,4 Ref=360,100

| Peak # | RetTime [min] | Type | Width [min] | Area [mAU*s] | Height [mAU] | Area %  | Peak # | RetTime [min] | Type | Width [min] | Area [mAU*s] | Height [mAU] | Area %  |
|--------|---------------|------|-------------|--------------|--------------|---------|--------|---------------|------|-------------|--------------|--------------|---------|
| 1      | 11.823        | VB   | 0.2313      | 7018.46631   | 472.40195    | 51.6914 | 1      | 11.997        | VV   | 0.2352      | 1.78847e4    | 1164.22034   | 95.3726 |
| 2      | 12.877        | BB   | 0.2531      | 6559.15430   | 404.71805    | 48.3086 | 2      | 13.138        | VB   | 0.2570      | 867.75684    | 51.91274     | 4.6274  |

Totals : 1.35776e4 877.12000

Totals : 1.87525e4 1216.13308

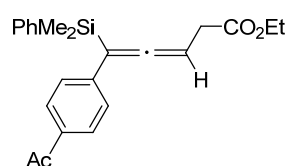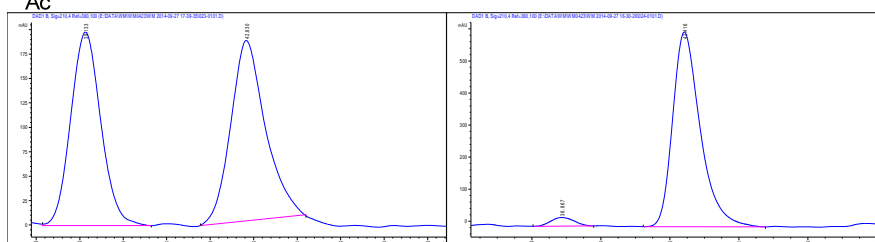

Signal 2: DAD1 B, Sig=210,4 Ref=360,100

| Peak # | RetTime [min] | Type | Width [min] | Area [mAU*s] | Height [mAU] | Area %  | Peak # | RetTime [min] | Type | Width [min] | Area [mAU*s] | Height [mAU] | Area %  |
|--------|---------------|------|-------------|--------------|--------------|---------|--------|---------------|------|-------------|--------------|--------------|---------|
| 1      | 39.133        | VB   | 0.7493      | 9528.21289   | 198.05148    | 48.4283 | 1      | 38.867        | BB   | 0.7589      | 1245.06531   | 26.65984     | 3.5559  |
| 2      | 42.830        | MM R | 0.9181      | 1.01467e4    | 184.19614    | 51.5717 | 2      | 42.416        | BB   | 0.8448      | 3.37687e4    | 607.19452    | 96.4441 |

Totals : 1.96749e4 382.24762

Totals : 3.50138e4 633.85436

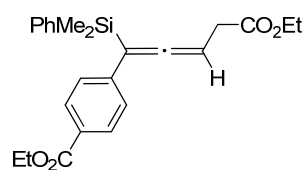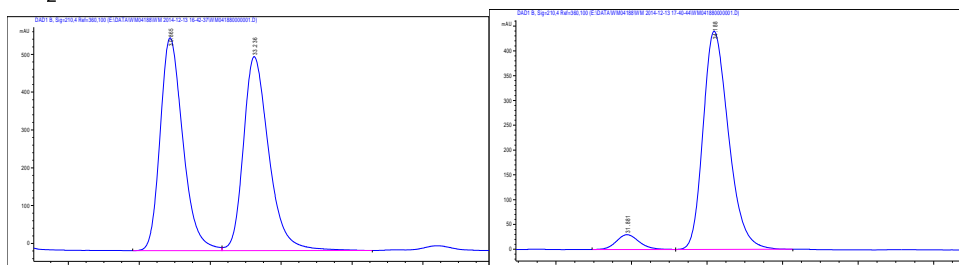

Signal 2: DAD1 B, Sig=210,4 Ref=360,100

| Peak # | RetTime [min] | Type | Width [min] | Area [mAU*s] | Height [mAU] | Area %  |
|--------|---------------|------|-------------|--------------|--------------|---------|
| 1      | 30.865        | BV   | 0.6837      | 2.50661e4    | 562.67657    | 49.5443 |
| 2      | 33.236        | VB   | 0.7610      | 2.55272e4    | 512.62451    | 50.4557 |

Totals : 5.05933e4 1075.30109

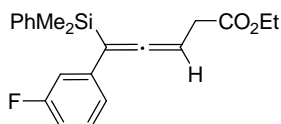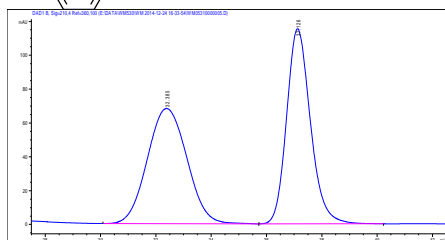

Signal 2: DAD1 B, Sig=210,4 Ref=360,100

| Peak # | RetTime [min] | Type | Width [min] | Area [mAU*s] | Height [mAU] | Area %  |
|--------|---------------|------|-------------|--------------|--------------|---------|
| 1      | 31.881        | MM   | 0.6324      | 1084.56628   | 28.58165     | 5.0982  |
| 2      | 34.188        | MM   | 0.7684      | 2.01888e4    | 437.90866    | 94.9018 |

Totals : 2.12734e4 466.49031

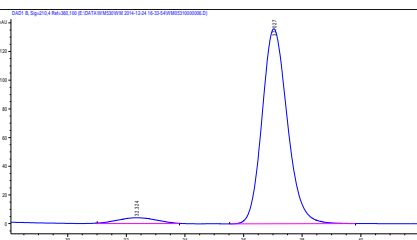

Signal 2: DAD1 B, Sig=210,4 Ref=360,100

| Peak # | RetTime [min] | Type | Width [min] | Area [mAU*s] | Height [mAU] | Area %  |
|--------|---------------|------|-------------|--------------|--------------|---------|
| 1      | 32.385        | BB   | 1.5615      | 6779.71533   | 68.09615     | 49.5457 |
| 2      | 37.126        | BB   | 0.9229      | 6904.03955   | 115.25564    | 50.4543 |

Totals : 1.36838e4 183.35178

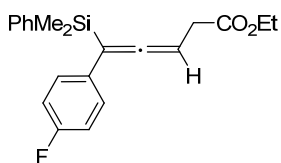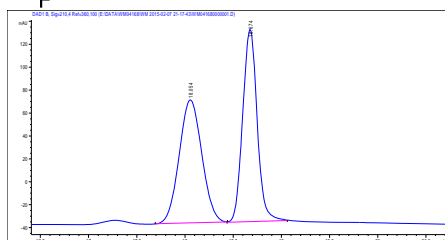

| Peak # | RetTime [min] | Type | Width [min] | Area [mAU*s] | Height [mAU] | Area %  |
|--------|---------------|------|-------------|--------------|--------------|---------|
| 1      | 32.324        | MM R | 1.5606      | 376.04007    | 4.01595      | 4.4190  |
| 2      | 37.027        | BB   | 0.9282      | 8133.50684   | 135.90018    | 95.5810 |

Totals : 8509.54691 139.91613

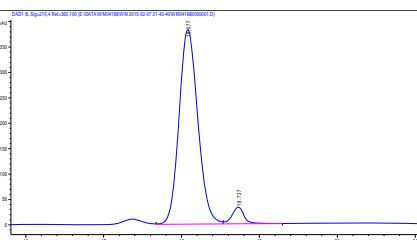

Signal 2: DAD1 B, Sig=210,4 Ref=360,100

| Peak # | RetTime [min] | Type | Width [min] | Area [mAU*s] | Height [mAU] | Area %  |
|--------|---------------|------|-------------|--------------|--------------|---------|
| 1      | 18.054        | MM R | 0.2714      | 1747.65857   | 107.30874    | 49.9679 |
| 2      | 18.674        | MM R | 0.1738      | 1749.90588   | 167.82521    | 50.0321 |

Totals : 3497.56445 275.13395

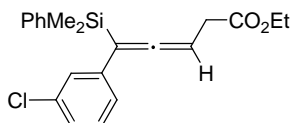

Signal 2: DAD1 B, Sig=210,4 Ref=360,100

| Peak # | RetTime [min] | Type | Width [min] | Area [mAU*s] | Height [mAU] | Area %  |
|--------|---------------|------|-------------|--------------|--------------|---------|
| 1      | 18.077        | VV   | 0.2616      | 6420.84766   | 382.96121    | 94.7884 |
| 2      | 18.727        | VB   | 0.1662      | 353.02951    | 32.64647     | 5.2116  |

Totals : 6773.87717 415.60769

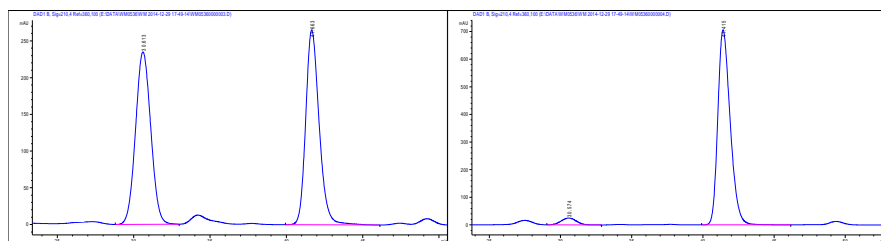

Signal 2: DAD1 B, Sig=210,4 Ref=360,100

Signal 2: DAD1 B, Sig=210,4 Ref=360,100

| Peak # | RetTime [min] | Type | Width [min] | Area [mAU*s] | Height [mAU] | Area %  | Peak # | RetTime [min] | Type | Width [min] | Area [mAU*s] | Height [mAU] | Area %  |
|--------|---------------|------|-------------|--------------|--------------|---------|--------|---------------|------|-------------|--------------|--------------|---------|
| 1      | 30.613        | BB   | 1.0859      | 1.62941e4    | 234.71832    | 50.0661 | 1      | 30.574        | BB   | 1.1348      | 1838.88354   | 24.80824     | 4.1294  |
| 2      | 41.663        | BB   | 0.9388      | 1.62511e4    | 265.22906    | 49.9339 | 2      | 41.415        | BB   | 0.9318      | 4.26925e4    | 705.71790    | 95.8706 |

Totals : 3.25453e4 499.94739

Totals : 4.45314e4 730.52613

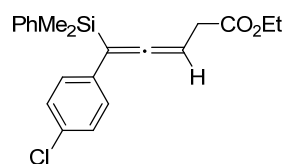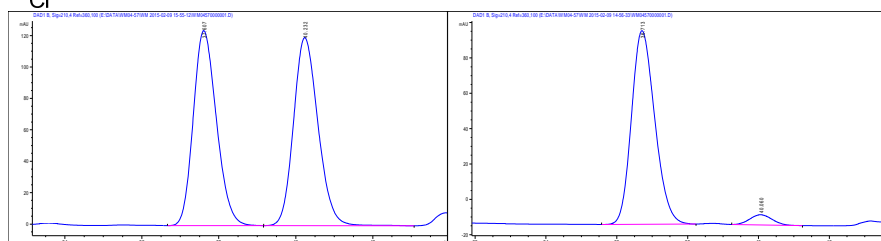

Signal 2: DAD1 B, Sig=210,4 Ref=360,100

Signal 2: DAD1 B, Sig=210,4 Ref=360,100

| Peak # | RetTime [min] | Type | Width [min] | Area [mAU*s] | Height [mAU] | Area %  |
|--------|---------------|------|-------------|--------------|--------------|---------|
| 1      | 37.607        | BB   | 0.6453      | 5181.97363   | 124.06824    | 49.4344 |
| 2      | 40.232        | BB   | 0.6888      | 5300.54492   | 119.66532    | 50.5656 |

Totals : 1.04825e4 243.73356

| Peak # | RetTime [min] | Type | Width [min] | Area [mAU*s] | Height [mAU] | Area %  |
|--------|---------------|------|-------------|--------------|--------------|---------|
| 1      | 36.713        | BB   | 0.7094      | 5003.88184   | 109.43909    | 95.1983 |
| 2      | 40.060        | BB   | 0.6742      | 252.38898    | 5.74917      | 4.8017  |

Totals : 5256.27081 115.18826

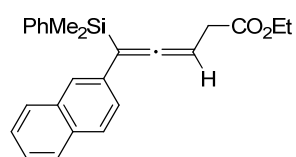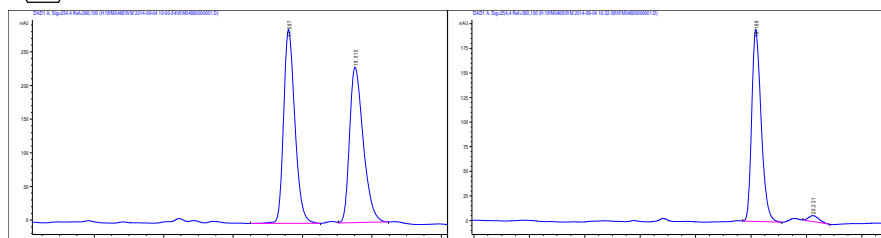

Signal 1: DAD1 A, Sig=254,4 Ref=360,100

Signal 1: DAD1 A, Sig=254,4 Ref=360,100

| Peak #   | RetTime [min] | Type | Width [min] | Area [mAU*s] | Height [mAU] | Area %  | Peak #   | RetTime [min] | Type | Width [min] | Area [mAU*s] | Height [mAU] | Area %  |
|----------|---------------|------|-------------|--------------|--------------|---------|----------|---------------|------|-------------|--------------|--------------|---------|
| 1        | 17.597        | BB   | 0.3498      | 6513.97119   | 288.04388    | 50.7785 | 1        | 18.169        | BB   | 0.3641      | 4617.32471   | 195.09680    | 96.7236 |
| 2        | 19.515        | VB   | 0.4190      | 6314.22412   | 230.92447    | 49.2215 | 2        | 20.231        | BB   | 0.4146      | 156.40437    | 5.99048      | 3.2764  |
| Totals : |               |      |             | 1.28282e4    | 518.96835    |         | Totals : |               |      |             | 4773.72908   | 201.08729    |         |

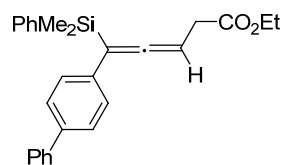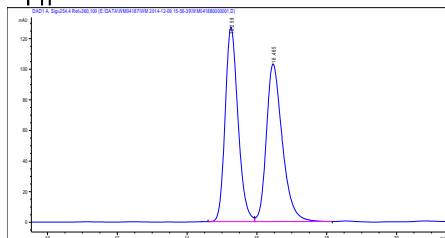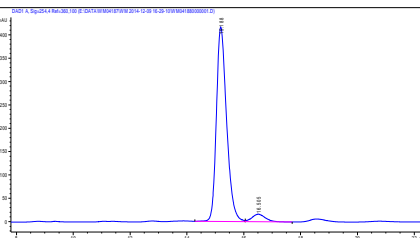

Signal 1: DAD1 A, Sig=254,4 Ref=360,100

Signal 1: DAD1 A, Sig=254,4 Ref=360,100

| Peak #   | RetTime [min] | Type | Width [min] | Area [mAU*s] | Height [mAU] | Area %  | Peak #   | RetTime [min] | Type | Width [min] | Area [mAU*s] | Height [mAU] | Area %  |
|----------|---------------|------|-------------|--------------|--------------|---------|----------|---------------|------|-------------|--------------|--------------|---------|
| 1        | 15.259        | BV   | 0.3916      | 3243.51953   | 127.16936    | 49.7793 | 1        | 15.188        | BV   | 0.3838      | 1.04129e4    | 416.37518    | 95.1790 |
| 2        | 16.465        | VB   | 0.4824      | 3272.27466   | 103.05710    | 50.2207 | 2        | 16.505        | VB   | 0.4990      | 527.43781    | 16.15190     | 4.8210  |
| Totals : |               |      |             | 6515.79419   | 230.22646    |         | Totals : |               |      |             | 1.09403e4    | 432.52708    |         |

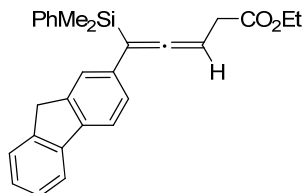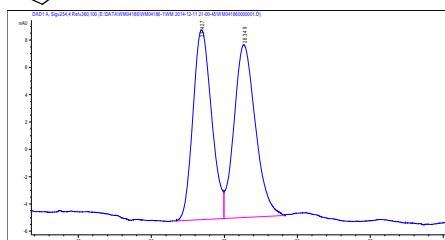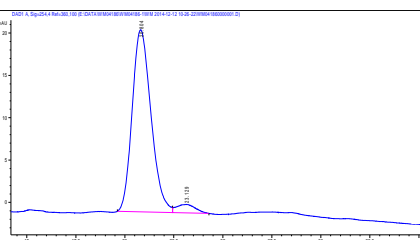

Signal 1: DAD1 A, Sig=254,4 Ref=360,100

Signal 1: DAD1 A, Sig=254,4 Ref=360,100

| Peak #   | RetTime [min] | Type | Width [min] | Area [mAU*s] | Height [mAU] | Area %  | Peak #   | RetTime [min] | Type | Width [min] | Area [mAU*s] | Height [mAU] | Area %  |
|----------|---------------|------|-------------|--------------|--------------|---------|----------|---------------|------|-------------|--------------|--------------|---------|
| 1        | 23.427        | MF R | 1.4750      | 1229.45691   | 13.89245     | 48.8172 | 1        | 20.804        | MF R | 1.1117      | 1432.39026   | 21.47523     | 95.5894 |
| 2        | 26.349        | FM R | 1.6993      | 1289.03662   | 12.64289     | 51.1828 | 2        | 23.129        | FM R | 1.1199      | 66.09176     | 9.83630e-1   | 4.4106  |
| Totals : |               |      |             | 2518.49353   | 26.53534     |         | Totals : |               |      |             | 1498.48202   | 22.45886     |         |

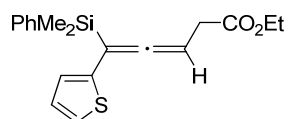

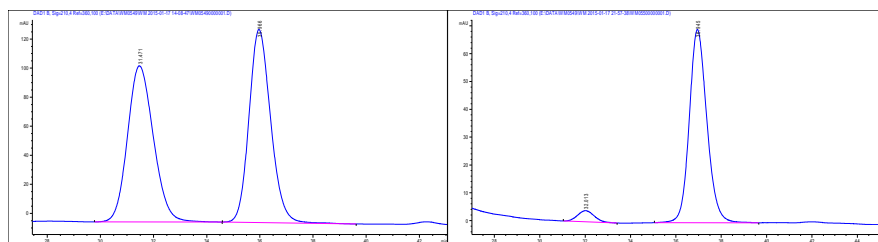

Signal 2: DAD1 B, Sig=210,4 Ref=360,100

Signal 2: DAD1 B, Sig=210,4 Ref=360,100

| Peak # | RetTime [min] | Type | Width [min] | Area [mAU*s] | Height [mAU] | Area %  | Peak # | RetTime [min] | Type | Width [min] | Area [mAU*s] | Height [mAU] | Area %  |
|--------|---------------|------|-------------|--------------|--------------|---------|--------|---------------|------|-------------|--------------|--------------|---------|
| 1      | 31.471        | BB   | 1.0533      | 7275.27393   | 107.53164    | 49.0921 | 1      | 32.013        | BB   | 0.7401      | 203.99904    | 3.99288      | 5.1631  |
| 2      | 35.966        | BB   | 0.8722      | 7544.35840   | 132.92227    | 50.9079 | 2      | 36.945        | BB   | 0.8276      | 3747.11523   | 69.43748     | 94.8369 |

Totals : 1.48196e4 240.45391

Totals : 3951.11427 73.43035

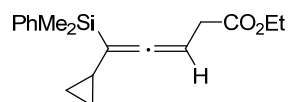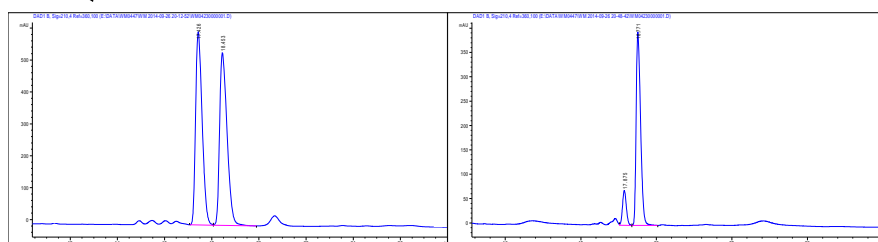

Signal 2: DAD1 B, Sig=210,4 Ref=360,100

Signal 2: DAD1 B, Sig=210,4 Ref=360,100

| Peak # | RetTime [min] | Type | Width [min] | Area [mAU*s] | Height [mAU] | Area %  | Peak # | RetTime [min] | Type | Width [min] | Area [mAU*s] | Height [mAU] | Area %  |
|--------|---------------|------|-------------|--------------|--------------|---------|--------|---------------|------|-------------|--------------|--------------|---------|
| 1      | 17.426        | BV   | 0.3050      | 1.17653e4    | 604.57373    | 49.6154 | 1      | 17.875        | VB   | 0.2717      | 1245.76013   | 71.36281     | 13.3103 |
| 2      | 18.453        | VB   | 0.3460      | 1.19477e4    | 540.25183    | 50.3846 | 2      | 18.771        | BB   | 0.3186      | 8113.60693   | 396.76343    | 86.6897 |

Totals : 2.37130e4 1144.82556

Totals : 9359.36707 468.12624

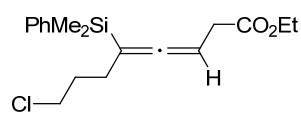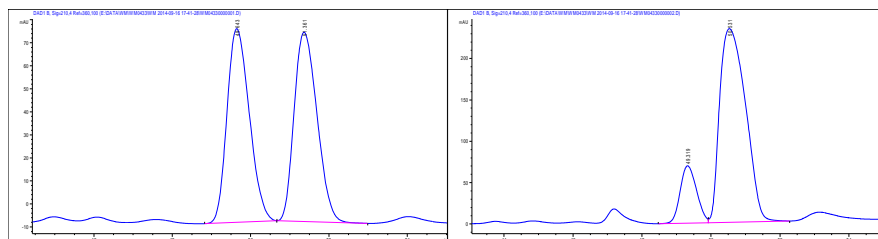

Signal 2: DAD1 B, Sig=210,4 Ref=360,100

Signal 2: DAD1 B, Sig=210,4 Ref=360,100

| Peak #   | RetTime [min] | Type | Width [min] | Area [mAU*s] | Height [mAU] | Area %  | Peak #   | RetTime [min] | Type | Width [min] | Area [mAU*s] | Height [mAU] | Area %  |
|----------|---------------|------|-------------|--------------|--------------|---------|----------|---------------|------|-------------|--------------|--------------|---------|
| 1        | 49.319        | BV   | 0.5236      | 2288.06104   | 69.23113     | 15.8424 | 1        | 49.319        | BV   | 0.5236      | 2288.06104   | 69.23113     | 15.8424 |
| 2        | 50.531        | VB   | 0.8941      | 1.21546e4    | 233.96143    | 84.1576 | 2        | 50.531        | VB   | 0.8941      | 1.21546e4    | 233.96143    | 84.1576 |
| Totals : |               |      |             | 1.44427e4    | 303.19256    |         | Totals : |               |      |             | 1.44427e4    | 303.19256    |         |

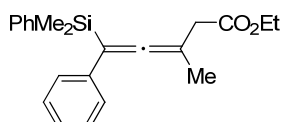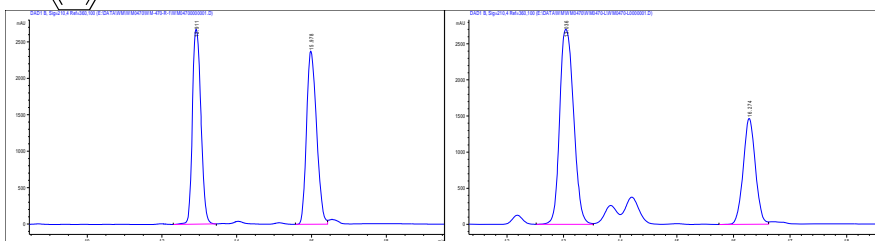

Signal 2: DAD1 B, Sig=210,4 Ref=360,100

Signal 2: DAD1 B, Sig=210,4 Ref=360,100

| Peak #   | RetTime [min] | Type | Width [min] | Area [mAU*s] | Height [mAU] | Area %  | Peak #   | RetTime [min] | Type | Width [min] | Area [mAU*s] | Height [mAU] | Area %  |
|----------|---------------|------|-------------|--------------|--------------|---------|----------|---------------|------|-------------|--------------|--------------|---------|
| 1        | 12.911        | BB   | 0.2488      | 4.23571e4    | 2674.21411   | 48.8188 | 1        | 13.036        | BV   | 0.2692      | 4.61007e4    | 2700.50464   | 67.7912 |
| 2        | 15.978        | BV   | 0.2899      | 4.44068e4    | 2377.54517   | 51.1812 | 2        | 16.274        | BV   | 0.2281      | 2.19033e4    | 1467.94019   | 32.2088 |
| Totals : |               |      |             | 8.67639e4    | 5051.75928   |         | Totals : |               |      |             | 6.80040e4    | 4168.44482   |         |

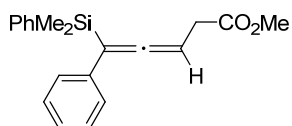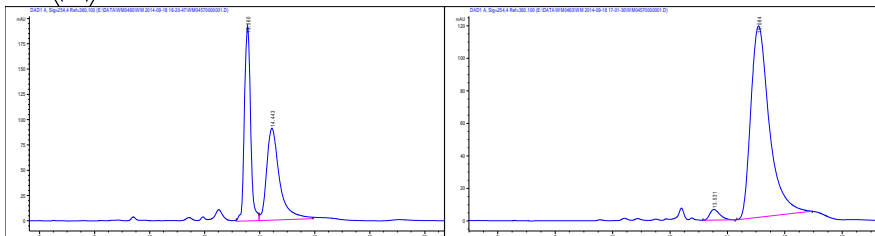

Signal 1: DAD1 A, Sig=254,4 Ref=360,100

Signal 1: DAD1 A, Sig=254,4 Ref=360,100

| Peak #   | RetTime [min] | Type | Width [min] | Area [mAU*s] | Height [mAU] | Area %  | Peak #   | RetTime [min] | Type | Width [min] | Area [mAU*s] | Height [mAU] | Area %  |
|----------|---------------|------|-------------|--------------|--------------|---------|----------|---------------|------|-------------|--------------|--------------|---------|
| 1        | 13.560        | BV   | 0.2503      | 3006.10669   | 192.39133    | 50.6007 | 1        | 13.531        | BB   | 0.3761      | 160.93994    | 6.56205      | 2.9567  |
| 2        | 14.443        | MM R | 0.5393      | 2934.72852   | 90.69703     | 49.3993 | 2        | 15.084        | MM R | 0.7455      | 5282.23047   | 118.09123    | 97.0433 |
| Totals : |               |      |             | 5940.83521   | 283.08836    |         | Totals : |               |      |             | 5443.17041   | 124.65328    |         |

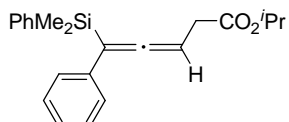

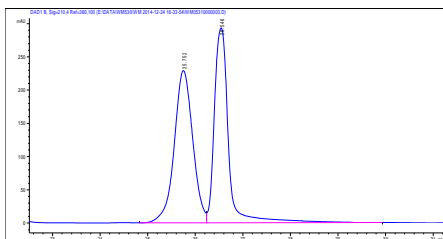

Signal 2: DAD1 B, Sig=210,4 Ref=360,100

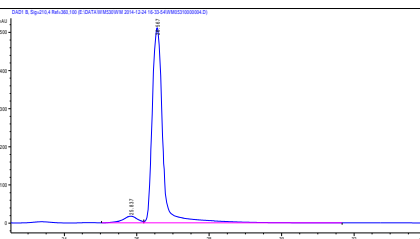

Signal 2: DAD1 B, Sig=210,4 Ref=360,100

| Peak # | RetTime [min] | Type | Width [min] | Area [mAU*s] | Height [mAU] | Area %  | Peak # | RetTime [min] | Type | Width [min] | Area [mAU*s] | Height [mAU] | Area %  |
|--------|---------------|------|-------------|--------------|--------------|---------|--------|---------------|------|-------------|--------------|--------------|---------|
| 1      | 25.752        | BV   | 0.4149      | 6183.56494   | 229.09872    | 50.6115 | 1      | 25.837        | BV   | 0.4212      | 489.96878    | 17.46968     | 4.4787  |
| 2      | 26.546        | VB   | 0.3241      | 6034.14160   | 293.16403    | 49.3885 | 2      | 26.567        | VB   | 0.3226      | 1.04500e4    | 510.96277    | 95.5213 |

Totals :

1.22177e4 522.26276

Totals :

1.09400e4 528.43245

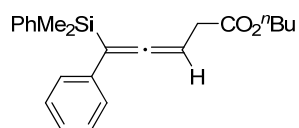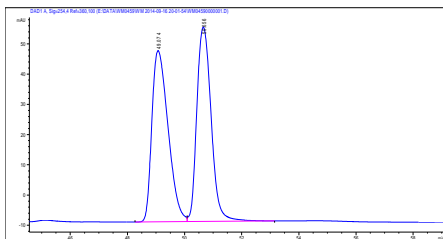

Signal 1: DAD1 A, Sig=254,4 Ref=360,100

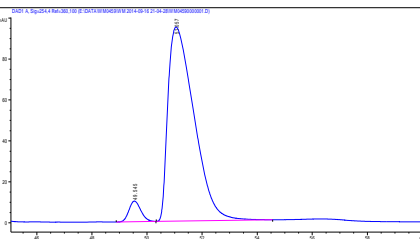

Signal 1: DAD1 A, Sig=254,4 Ref=360,100

| Peak # | RetTime [min] | Type | Width [min] | Area [mAU*s] | Height [mAU] | Area %  | Peak # | RetTime [min] | Type | Width [min] | Area [mAU*s] | Height [mAU] | Area %  |
|--------|---------------|------|-------------|--------------|--------------|---------|--------|---------------|------|-------------|--------------|--------------|---------|
| 1      | 49.074        | BV   | 0.6235      | 2229.79028   | 56.62008     | 49.9018 | 1      | 49.545        | BB   | 0.4655      | 302.33047    | 10.09297     | 4.6291  |
| 2      | 50.656        | VB   | 0.5562      | 2238.56616   | 64.28928     | 50.0982 | 2      | 51.057        | BB   | 1.0367      | 6228.77637   | 94.78144     | 95.3709 |

Totals :

4468.35645 120.90936

Totals :

6531.10684 104.87441



#### 4. Determination of the Absolute Configuration of Compound 3s\*.

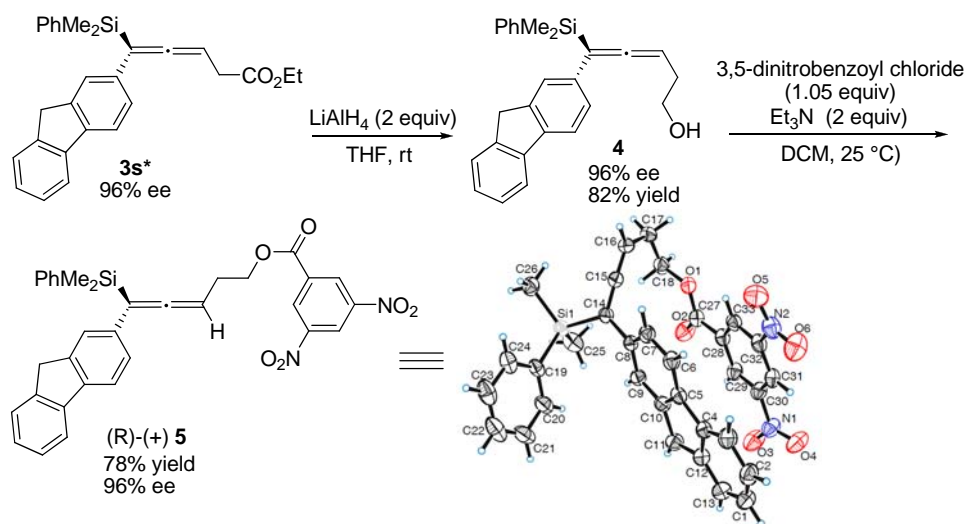

In an oven dried 10 mL round bottom flask equipped with a stirring bar, 0.4 mmol (175.8 mg, 1 equiv) was dissolved in 4 mL of dry THF under argon atmosphere. The solution was added  $\text{LiAlH}_4$  (30.4 mg, 2 equiv) in four batches at 0 °C. The final solution was continued to stir for 5 hours at room temperature. Then the reaction was quenched with water and excess amount of saturated potassium sodium tartrate was introduced, and the solution was stirred for 30 minutes at room temperature. The final solution was extracted with ethyl acetate (10 mL $\times$ 2), and the combined organic layer was washed with saturated brine (5 mL) and dried over anhydrous  $\text{Na}_2\text{SO}_4$ . The final filtrate was concentrated under vacuum to afford the crude product which was isolated through flash column chromatography (Eluent: PE/EA = 80:20) to furnish the related product **4** (130.5 mg, 82% yield) as yellow oil.

To a solution of 3,5-dinitrobenzoyl chloride (79.5 mg, 1.05 equiv) and alcohol **4** (130.5 mg, 1 equiv) with trace amount of DMAP in dichloromethane (2 mL) was added  $\text{Et}_3\text{N}$  (66.5 mg, 2 equiv) dropwise. The resulting mixture was stirred for 1 hour at room temperature, the final solution was directly subjected to column chromatography on silica gel (elution with PE:EA = 90:10) for purification of the crude product. The compound **5** was isolated (151.4 mg, 78% yield) as a bright yellow solide.  $^1\text{H}$ NMR (400 MHz,  $\text{CDCl}_3$ ):  $\delta$  8.66 (d,  $J$  = 2.2 Hz, 2H), 8.47 (t,  $J$  = 2.2 Hz, 1H), 7.60-7.57 (m, 2H), 7.48-7.45 (m, 1H), 7.40-7.31 (m, 5H), 7.27 (dd,  $J$  = 7.4, 1.3 Hz, 1H), 7.19 (d,  $J$  = 7.9 Hz, 1H), 7.15 (s, 1H), 7.01 (dd,  $J$  = 7.9, 1.6 Hz, 1H),



5.27 (t,  $J = 6.2$  Hz, 1H), 4.60-4.46 (m, 2H), 3.50 (d,  $J = 22$  Hz, 1H), 3.41 (d,  $J = 22$  Hz, 1H), 2.60 (q,  $J = 6.1$  Hz, 2H), 0.53 (s, 3H), 0.46 (s, 3H).  $^{13}\text{C}$  NMR (100 MHz,  $\text{CDCl}_3$ ):  $\delta$  210.3, 162.4, 147.7, 143.1, 142.6, 140.8, 139.7, 138.0, 135.6, 134.0, 133.1, 129.4, 128.6, 128.0, 127.2, 127.0, 126.6, 125.1, 124.2, 121.6, 119.4, 119.2, 100.8, 82.9, 65.0, 36.6, 27.6, -1.0, -1.7..

$[\alpha]_{\text{D}}^{25} +1.63^\circ$  ( $c = 1.00$ ,  $\text{CHCl}_3$ ).

96% ee, HPLC, IC, Hexane:PrOH = 94:6, 0.6 mL/min, 32.0 min (major), 34.6 min (minor).

HRMS (ESI):  $m/z$  calculated for  $\text{C}_{33}\text{H}_{28}\text{O}_6\text{N}_2\text{SiNa}$   $[\text{M}+\text{Na}]^+$ : 599.1614 found: 599.1606.

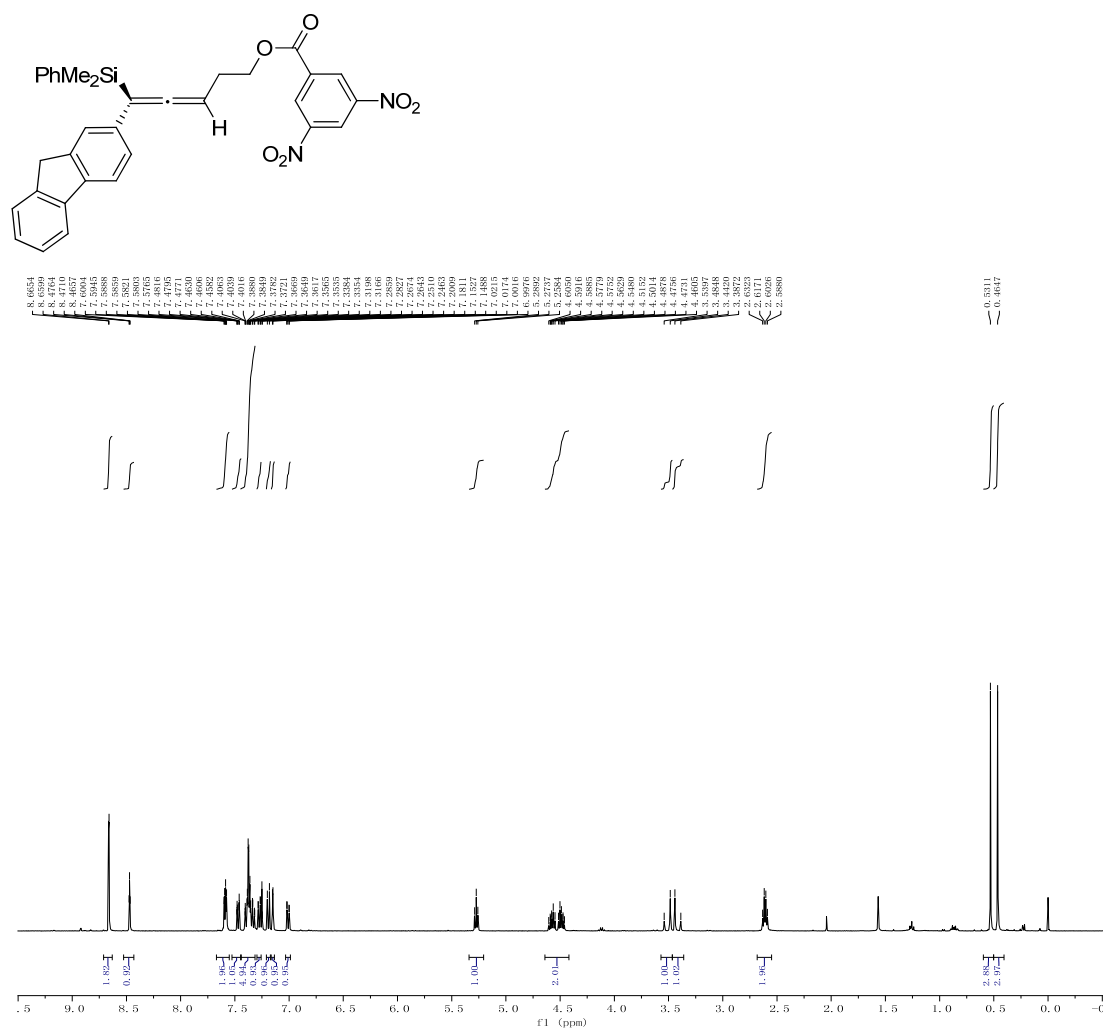

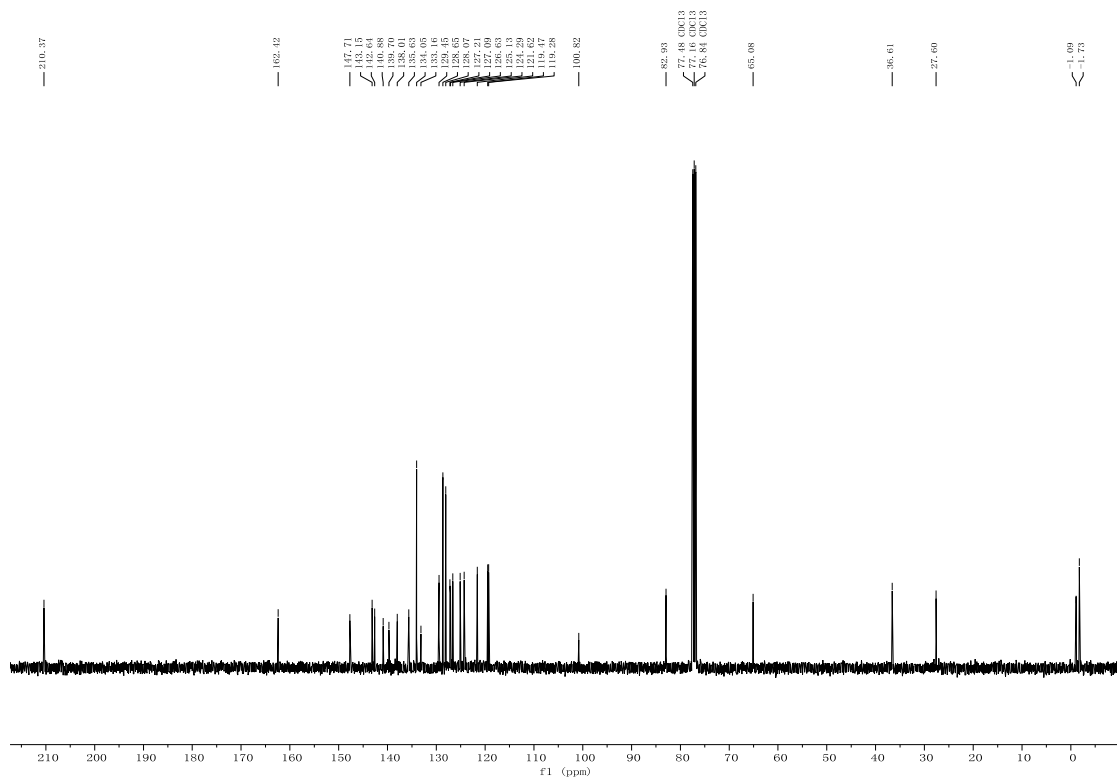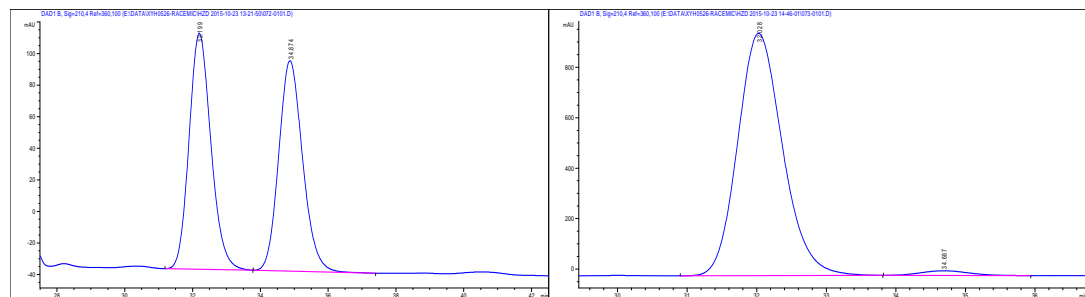

| Signal 2: DAD1 B, Sig=210,4 Ref=360,100 |               |      |             |              |              |         | Signal 2: DAD1 B, Sig=210,4 Ref=360,100 |               |      |             |              |              |         |
|-----------------------------------------|---------------|------|-------------|--------------|--------------|---------|-----------------------------------------|---------------|------|-------------|--------------|--------------|---------|
| Peak #                                  | RetTime [min] | Type | Width [min] | Area [mAU*s] | Height [mAU] | Area %  | Peak #                                  | RetTime [min] | Type | Width [min] | Area [mAU*s] | Height [mAU] | Area %  |
| 1                                       | 32.199        | BB   | 0.6874      | 6706.54883   | 149.48610    | 50.6045 | 1                                       | 32.028        | BB   | 0.6904      | 4.29782e4    | 959.82495    | 97.9911 |
| 2                                       | 34.874        | BB   | 0.7529      | 6546.32178   | 133.30595    | 49.3955 | 2                                       | 34.687        | BB   | 0.7160      | 881.06775    | 18.48867     | 2.0089  |
| Totals :                                |               |      |             | 1.32529e4    | 282.79205    |         | Totals :                                |               |      |             | 4.38593e4    | 978.31362    |         |
